# Supplementary material
Source: publisher figshare collection journal article supplement (https://acs.figshare.com/ndownloader/files/4417933)
Supplement: Supplementary file 1 [file 4417933]

 
data_ls096_0m
 
_audit_creation_method            SHELXL-97
_chemical_name_systematic
;
 ?
;
_chemical_name_common             ?
_chemical_melting_point           ?
_chemical_formula_moiety          'C40 H50 N2 O2 Zr'
_chemical_formula_sum
 'C40 H50 N2 O2 Zr'
_chemical_formula_weight          682.04
 
loop_
 _atom_type_symbol
 _atom_type_description
 _atom_type_scat_dispersion_real
 _atom_type_scat_dispersion_imag
 _atom_type_scat_source
 'C'  'C'   0.0033   0.0016
 'International Tables Vol C Tables 4.2.6.8 and 6.1.1.4'
 'H'  'H'   0.0000   0.0000
 'International Tables Vol C Tables 4.2.6.8 and 6.1.1.4'
 'N'  'N'   0.0061   0.0033
 'International Tables Vol C Tables 4.2.6.8 and 6.1.1.4'
 'O'  'O'   0.0106   0.0060
 'International Tables Vol C Tables 4.2.6.8 and 6.1.1.4'
 'Zr'  'Zr'  -2.9673   0.5597
 'International Tables Vol C Tables 4.2.6.8 and 6.1.1.4'
 
_symmetry_cell_setting            Triclinic
_symmetry_space_group_name_H-M    P-1
 
loop_
 _symmetry_equiv_pos_as_xyz
 'x, y, z'
 '-x, -y, -z'
 
_cell_length_a                    9.719(2)
_cell_length_b                    12.169(3)
_cell_length_c                    16.612(4)
_cell_angle_alpha                 72.624(10)
_cell_angle_beta                  85.866(11)
_cell_angle_gamma                 76.118(10)
_cell_volume                      1820.3(7)
_cell_formula_units_Z             2
_cell_measurement_temperature     173(2)
_cell_measurement_reflns_used     ?
_cell_measurement_theta_min       2.27
_cell_measurement_theta_max       36.55
 
_exptl_crystal_description        Needle
_exptl_crystal_colour             Yellow
_exptl_crystal_size_max           0.30
_exptl_crystal_size_mid           0.25
_exptl_crystal_size_min           0.20
_exptl_crystal_density_meas       ?
_exptl_crystal_density_diffrn     1.244
_exptl_crystal_density_method     'not measured'
_exptl_crystal_F_000              720
_exptl_absorpt_coefficient_mu     0.337
_exptl_absorpt_correction_type    'Multi-scan'
_exptl_absorpt_correction_T_min   ?
_exptl_absorpt_correction_T_max   ?
_exptl_absorpt_process_details    ?
 
_exptl_special_details
;
 ?
;
 
_diffrn_ambient_temperature       173(2)
_diffrn_radiation_wavelength      0.71073
_diffrn_radiation_type            MoK\a
_diffrn_radiation_source          'fine-focus sealed tube'
_diffrn_radiation_monochromator   graphite
_diffrn_measurement_device_type   ?
_diffrn_measurement_method        ?
_diffrn_detector_area_resol_mean  ?
_diffrn_standards_number          ?
_diffrn_standards_interval_count  ?
_diffrn_standards_interval_time   ?
_diffrn_standards_decay_%         ?
_diffrn_reflns_number             52902
_diffrn_reflns_av_R_equivalents   0.0339
_diffrn_reflns_av_sigmaI/netI     0.0458
_diffrn_reflns_limit_h_min        -16
_diffrn_reflns_limit_h_max        14
_diffrn_reflns_limit_k_min        -19
_diffrn_reflns_limit_k_max        17
_diffrn_reflns_limit_l_min        -26
_diffrn_reflns_limit_l_max        24
_diffrn_reflns_theta_min          1.28
_diffrn_reflns_theta_max          36.55
_reflns_number_total              15411
_reflns_number_gt                 11233
_reflns_threshold_expression      >2sigma(I)
 
_computing_data_collection        ?
_computing_cell_refinement        CrystalClear
_computing_data_reduction         CrystalClear
_computing_structure_solution     SIR-97
_computing_structure_refinement   'SHELXL-97 (Sheldrick, 1997)'
_computing_molecular_graphics     'ORTEP-3 (Farrugia, 1997)'
_computing_publication_material   'PLATON (Spek, 1990)'
 
_refine_special_details
;
 Refinement of F^2^ against ALL reflections.  The weighted R-factor wR and
 goodness of fit S are based on F^2^, conventional R-factors R are based
 on F, with F set to zero for negative F^2^. The threshold expression of
 F^2^ > 2sigma(F^2^) is used only for calculating R-factors(gt) etc. and is
 not relevant to the choice of reflections for refinement.  R-factors based
 on F^2^ are statistically about twice as large as those based on F, and R-
 factors based on ALL data will be even larger.
;
 
_refine_ls_structure_factor_coef  Fsqd
_refine_ls_matrix_type            full
_refine_ls_weighting_scheme       calc
_refine_ls_weighting_details
 'calc w=1/[\s^2^(Fo^2^)+(0.0764P)^2^+0.1306P] where P=(Fo^2^+2Fc^2^)/3'
_atom_sites_solution_primary      direct
_atom_sites_solution_secondary    difmap
_atom_sites_solution_hydrogens    geom
_refine_ls_hydrogen_treatment     mixed
_refine_ls_extinction_method      none
_refine_ls_extinction_coef        ?
_refine_ls_number_reflns          15411
_refine_ls_number_parameters      406
_refine_ls_number_restraints      0
_refine_ls_R_factor_all           0.0707
_refine_ls_R_factor_gt            0.0450
_refine_ls_wR_factor_ref          0.1359
_refine_ls_wR_factor_gt           0.1206
_refine_ls_goodness_of_fit_ref    1.044
_refine_ls_restrained_S_all       1.044
_refine_ls_shift/su_max           0.001
_refine_ls_shift/su_mean          0.000
 
loop_
 _atom_site_label
 _atom_site_type_symbol
 _atom_site_fract_x
 _atom_site_fract_y
 _atom_site_fract_z
 _atom_site_U_iso_or_equiv
 _atom_site_adp_type
 _atom_site_occupancy
 _atom_site_symmetry_multiplicity
 _atom_site_calc_flag
 _atom_site_refinement_flags
 _atom_site_disorder_assembly
 _atom_site_disorder_group
Zr1 Zr 0.713847(15) 0.275676(12) 0.239052(9) 0.02586(5) Uani 1 1 d . . .
O2 O 0.78309(14) 0.28459(10) 0.35383(7) 0.0349(3) Uani 1 1 d . . .
O1 O 0.89885(13) 0.15837(10) 0.21637(9) 0.0388(3) Uani 1 1 d . . .
N2 N 0.82587(14) 0.41892(11) 0.24369(8) 0.0272(2) Uani 1 1 d . . .
N1 N 0.73452(14) 0.07582(11) 0.28368(9) 0.0288(3) Uani 1 1 d . . .
C2 C 0.84782(17) 0.37067(14) 0.32306(10) 0.0297(3) Uani 1 1 d . . .
C16 C 0.79414(18) 0.62791(15) 0.17887(11) 0.0343(3) Uani 1 1 d . . .
C1 C 0.86317(17) 0.05932(14) 0.25694(12) 0.0343(3) Uani 1 1 d . . .
C20 C 0.99691(18) 0.49353(17) 0.14203(11) 0.0364(4) Uani 1 1 d . . .
C15 C 0.87591(17) 0.51442(14) 0.18942(10) 0.0288(3) Uani 1 1 d . . .
C4 C 0.57258(18) -0.04833(14) 0.29024(12) 0.0347(3) Uani 1 1 d . . .
C17 C 0.8392(2) 0.72131(17) 0.12313(13) 0.0433(4) Uani 1 1 d . . .
H17 H 0.7866 0.7981 0.1166 0.052 Uiso 1 1 calc R . .
C8 C 0.6694(2) -0.04274(16) 0.41869(13) 0.0415(4) Uani 1 1 d . . .
C28 C 0.42942(17) 0.39771(15) 0.28372(12) 0.0352(4) Uani 1 1 d . . .
C34 C 0.6831(2) 0.38503(18) 0.10405(11) 0.0424(4) Uani 1 1 d . . .
H34A H 0.6112 0.4574 0.0992 0.051 Uiso 1 1 calc R . .
H34B H 0.7708 0.4053 0.0800 0.051 Uiso 1 1 calc R . .
C3 C 0.66121(17) -0.00859(13) 0.33166(11) 0.0312(3) Uani 1 1 d . . .
C22 C 0.6610(2) 0.64929(17) 0.22723(15) 0.0476(5) Uani 1 1 d . . .
H22A H 0.6452 0.5752 0.2628 0.071 Uiso 1 1 calc R . .
H22B H 0.5831 0.6878 0.1888 0.071 Uiso 1 1 calc R . .
H22C H 0.6686 0.6988 0.2614 0.071 Uiso 1 1 calc R . .
C29 C 0.36102(19) 0.49347(16) 0.22047(15) 0.0445(4) Uani 1 1 d . . .
H29 H 0.3486 0.4846 0.1680 0.053 Uiso 1 1 calc R . .
C5 C 0.4982(2) -0.12945(17) 0.33794(15) 0.0459(5) Uani 1 1 d . . .
H5 H 0.4394 -0.1579 0.3113 0.055 Uiso 1 1 calc R . .
C27 C 0.48448(19) 0.28035(15) 0.27057(13) 0.0393(4) Uani 1 1 d . . .
H27A H 0.4354 0.2723 0.2246 0.047 Uiso 1 1 calc R . .
H27B H 0.4743 0.2177 0.3213 0.047 Uiso 1 1 calc R . .
C33 C 0.4488(2) 0.41790(19) 0.35964(14) 0.0470(4) Uani 1 1 d . . .
H33 H 0.4973 0.3559 0.4030 0.056 Uiso 1 1 calc R . .
C19 C 1.0373(2) 0.5896(2) 0.08611(13) 0.0472(5) Uani 1 1 d . . .
H19 H 1.1184 0.5775 0.0537 0.057 Uiso 1 1 calc R . .
C9 C 0.5572(2) -0.00559(17) 0.19728(13) 0.0442(4) Uani 1 1 d . . .
H9A H 0.6156 0.0498 0.1743 0.066 Uiso 1 1 calc R . .
H9B H 0.4600 0.0325 0.1829 0.066 Uiso 1 1 calc R . .
H9C H 0.5861 -0.0714 0.1745 0.066 Uiso 1 1 calc R . .
C11 C 0.9777(2) -0.05162(17) 0.26416(18) 0.0535(6) Uani 1 1 d . . .
C35 C 0.6377(2) 0.31007(19) 0.06110(11) 0.0450(4) Uani 1 1 d . . .
C7 C 0.5935(3) -0.1241(2) 0.46351(15) 0.0566(6) Uani 1 1 d . . .
H7 H 0.5989 -0.1499 0.5221 0.068 Uiso 1 1 calc R . .
C23 C 0.9374(2) 0.39243(19) 0.38501(12) 0.0455(4) Uani 1 1 d . . .
C32 C 0.3987(3) 0.5264(2) 0.37238(18) 0.0618(7) Uani 1 1 d . . .
H32 H 0.4125 0.5367 0.4242 0.074 Uiso 1 1 calc R . .
C30 C 0.3107(2) 0.60264(18) 0.23441(19) 0.0590(7) Uani 1 1 d . . .
H30 H 0.2637 0.6659 0.1912 0.071 Uiso 1 1 calc R . .
C36 C 0.4962(3) 0.3271(2) 0.04113(14) 0.0601(6) Uani 1 1 d . . .
H36 H 0.4296 0.3887 0.0537 0.072 Uiso 1 1 calc R . .
C10 C 0.7594(3) 0.0051(2) 0.46349(14) 0.0539(5) Uani 1 1 d . . .
H10A H 0.7514 -0.0283 0.5233 0.081 Uiso 1 1 calc R . .
H10B H 0.7278 0.0896 0.4491 0.081 Uiso 1 1 calc R . .
H10C H 0.8565 -0.0155 0.4467 0.081 Uiso 1 1 calc R . .
C21 C 1.0836(2) 0.37167(19) 0.15125(15) 0.0490(5) Uani 1 1 d . . .
H21A H 1.0407 0.3157 0.1923 0.074 Uiso 1 1 calc R . .
H21B H 1.1775 0.3656 0.1694 0.074 Uiso 1 1 calc R . .
H21C H 1.0887 0.3551 0.0980 0.074 Uiso 1 1 calc R . .
C40 C 0.7316(3) 0.2181(2) 0.04161(14) 0.0584(6) Uani 1 1 d . . .
H40 H 0.8270 0.2035 0.0547 0.070 Uiso 1 1 calc R . .
C18 C 0.9598(2) 0.7027(2) 0.07756(14) 0.0506(5) Uani 1 1 d . . .
H18 H 0.9898 0.7665 0.0406 0.061 Uiso 1 1 calc R . .
C31 C 0.3285(2) 0.6195(2) 0.3098(2) 0.0622(7) Uani 1 1 d . . .
H31 H 0.2935 0.6931 0.3186 0.075 Uiso 1 1 calc R . .
C38 C 0.5478(5) 0.1663(3) -0.01655(17) 0.0886(12) Uani 1 1 d . . .
H38 H 0.5177 0.1190 -0.0432 0.106 Uiso 1 1 calc R . .
C13 C 0.9323(2) -0.16483(17) 0.30501(19) 0.0584(6) Uani 1 1 d . . .
H13A H 1.0109 -0.2306 0.3067 0.088 Uiso 1 1 calc R . .
H13B H 0.8563 -0.1693 0.2731 0.088 Uiso 1 1 calc R . .
H13C H 0.9005 -0.1671 0.3614 0.088 Uiso 1 1 calc R . .
C6 C 0.5101(3) -0.1676(2) 0.42290(16) 0.0570(6) Uani 1 1 d . . .
H6 H 0.4616 -0.2237 0.4541 0.068 Uiso 1 1 calc R . .
C14 C 1.0975(3) -0.0420(2) 0.3162(3) 0.0925(12) Uani 1 1 d . . .
H14A H 1.1741 -0.1106 0.3226 0.139 Uiso 1 1 calc R . .
H14B H 1.0618 -0.0373 0.3708 0.139 Uiso 1 1 calc R . .
H14C H 1.1309 0.0277 0.2875 0.139 Uiso 1 1 calc R . .
C39 C 0.6873(4) 0.1457(3) 0.00245(17) 0.0835(10) Uani 1 1 d . . .
H39 H 0.7527 0.0838 -0.0106 0.100 Uiso 1 1 calc R . .
C26 C 1.0063(3) 0.4957(2) 0.34914(16) 0.0641(7) Uani 1 1 d . . .
H26A H 1.0604 0.5036 0.3924 0.096 Uiso 1 1 calc R . .
H26B H 0.9345 0.5669 0.3287 0.096 Uiso 1 1 calc R . .
H26C H 1.0679 0.4823 0.3035 0.096 Uiso 1 1 calc R . .
C12 C 1.0260(3) -0.0484(2) 0.1746(2) 0.0886(11) Uani 1 1 d . . .
H12A H 1.0992 -0.1176 0.1756 0.133 Uiso 1 1 calc R . .
H12B H 1.0621 0.0210 0.1494 0.133 Uiso 1 1 calc R . .
H12C H 0.9472 -0.0466 0.1421 0.133 Uiso 1 1 calc R . .
C37 C 0.4526(4) 0.2559(3) 0.00350(18) 0.0883(11) Uani 1 1 d . . .
H37 H 0.3571 0.2687 -0.0085 0.106 Uiso 1 1 calc R . .
C25 C 0.8436(4) 0.4094(4) 0.45805(19) 0.1087(15) Uani 1 1 d . . .
H25A H 0.8968 0.4240 0.4987 0.163 Uiso 1 1 calc R . .
H25B H 0.8089 0.3394 0.4838 0.163 Uiso 1 1 calc R . .
H25C H 0.7651 0.4756 0.4385 0.163 Uiso 1 1 calc R . .
C24 C 1.0508(4) 0.2799(3) 0.4155(3) 0.1044(14) Uani 1 1 d . . .
H24A H 1.1110 0.2890 0.4552 0.157 Uiso 1 1 calc R . .
H24B H 1.1063 0.2639 0.3683 0.157 Uiso 1 1 calc R . .
H24C H 1.0070 0.2152 0.4422 0.157 Uiso 1 1 calc R . .
 
loop_
 _atom_site_aniso_label
 _atom_site_aniso_U_11
 _atom_site_aniso_U_22
 _atom_site_aniso_U_33
 _atom_site_aniso_U_23
 _atom_site_aniso_U_13
 _atom_site_aniso_U_12
Zr1 0.02679(8) 0.02136(7) 0.03055(8) -0.00817(6) 0.00132(5) -0.00722(5)
O2 0.0451(7) 0.0311(6) 0.0300(6) -0.0056(5) 0.0000(5) -0.0158(5)
O1 0.0288(6) 0.0309(6) 0.0608(8) -0.0175(6) 0.0100(5) -0.0119(5)
N2 0.0277(6) 0.0252(6) 0.0302(6) -0.0083(5) 0.0014(5) -0.0089(5)
N1 0.0254(6) 0.0221(5) 0.0387(7) -0.0087(5) 0.0001(5) -0.0054(5)
C2 0.0316(7) 0.0288(7) 0.0310(7) -0.0108(6) 0.0010(6) -0.0089(6)
C16 0.0336(8) 0.0324(8) 0.0399(9) -0.0078(7) 0.0005(7) -0.0170(6)
C1 0.0281(7) 0.0282(7) 0.0503(10) -0.0168(7) 0.0015(7) -0.0071(6)
C20 0.0324(8) 0.0471(10) 0.0357(8) -0.0147(7) 0.0053(7) -0.0188(7)
C15 0.0292(7) 0.0322(7) 0.0290(7) -0.0090(6) 0.0009(6) -0.0146(6)
C4 0.0319(8) 0.0270(7) 0.0469(10) -0.0110(7) 0.0008(7) -0.0096(6)
C17 0.0463(10) 0.0333(9) 0.0500(11) -0.0023(8) -0.0027(8) -0.0203(8)
C8 0.0479(10) 0.0304(8) 0.0433(10) -0.0037(7) -0.0030(8) -0.0114(7)
C28 0.0243(7) 0.0296(7) 0.0505(10) -0.0097(7) 0.0086(7) -0.0088(6)
C34 0.0517(11) 0.0468(10) 0.0322(8) -0.0070(8) -0.0001(8) -0.0237(9)
C3 0.0289(7) 0.0206(6) 0.0420(9) -0.0055(6) 0.0002(6) -0.0064(5)
C22 0.0405(10) 0.0309(8) 0.0697(14) -0.0145(9) 0.0125(9) -0.0089(7)
C29 0.0296(8) 0.0347(9) 0.0662(13) -0.0108(9) -0.0056(8) -0.0047(7)
C5 0.0405(10) 0.0392(9) 0.0626(13) -0.0137(9) 0.0048(9) -0.0208(8)
C27 0.0338(8) 0.0281(8) 0.0533(11) -0.0098(8) 0.0085(8) -0.0072(6)
C33 0.0421(10) 0.0466(11) 0.0495(11) -0.0145(9) 0.0112(9) -0.0076(8)
C19 0.0417(10) 0.0658(13) 0.0404(10) -0.0142(9) 0.0137(8) -0.0295(10)
C9 0.0523(11) 0.0394(9) 0.0468(11) -0.0142(8) -0.0048(9) -0.0184(8)
C11 0.0287(8) 0.0317(9) 0.1021(19) -0.0267(11) 0.0062(10) -0.0033(7)
C35 0.0618(12) 0.0541(11) 0.0244(8) -0.0060(8) 0.0028(8) -0.0309(10)
C7 0.0743(16) 0.0469(11) 0.0446(11) 0.0013(9) 0.0031(11) -0.0258(11)
C23 0.0542(11) 0.0532(11) 0.0359(9) -0.0106(8) -0.0062(8) -0.0264(9)
C32 0.0467(12) 0.0723(16) 0.0815(17) -0.0470(15) 0.0211(12) -0.0173(11)
C30 0.0317(9) 0.0308(9) 0.106(2) -0.0090(11) -0.0029(11) -0.0032(7)
C36 0.0692(15) 0.0760(16) 0.0375(10) -0.0043(10) -0.0171(10) -0.0316(13)
C10 0.0715(15) 0.0469(11) 0.0430(11) -0.0033(9) -0.0138(10) -0.0208(11)
C21 0.0363(9) 0.0550(12) 0.0635(13) -0.0284(11) 0.0181(9) -0.0160(9)
C40 0.0829(17) 0.0684(15) 0.0366(10) -0.0211(10) 0.0172(10) -0.0389(13)
C18 0.0526(12) 0.0509(12) 0.0483(11) 0.0002(9) 0.0053(9) -0.0318(10)
C31 0.0336(10) 0.0429(11) 0.122(2) -0.0437(14) 0.0145(12) -0.0105(9)
C38 0.154(3) 0.102(2) 0.0415(13) -0.0232(15) -0.0065(17) -0.084(3)
C13 0.0391(10) 0.0279(9) 0.107(2) -0.0226(11) -0.0022(11) -0.0002(8)
C6 0.0629(14) 0.0468(12) 0.0612(14) -0.0027(10) 0.0104(11) -0.0318(11)
C14 0.0343(11) 0.0539(15) 0.190(4) -0.040(2) -0.0329(17) 0.0039(10)
C39 0.149(3) 0.082(2) 0.0435(13) -0.0336(14) 0.0250(16) -0.061(2)
C26 0.0754(16) 0.0826(17) 0.0528(13) -0.0181(12) -0.0103(12) -0.0518(14)
C12 0.085(2) 0.0515(14) 0.133(3) -0.0473(17) 0.061(2) -0.0149(14)
C37 0.113(3) 0.122(3) 0.0496(15) -0.0134(17) -0.0239(16) -0.071(2)
C25 0.133(3) 0.192(4) 0.0607(18) -0.076(2) 0.0376(19) -0.110(3)
C24 0.103(3) 0.082(2) 0.120(3) -0.007(2) -0.076(2) -0.0119(19)
 
_geom_special_details
;
 All esds (except the esd in the dihedral angle between two l.s. planes)
 are estimated using the full covariance matrix.  The cell esds are taken
 into account individually in the estimation of esds in distances, angles
 and torsion angles; correlations between esds in cell parameters are only
 used when they are defined by crystal symmetry.  An approximate (isotropic)
 treatment of cell esds is used for estimating esds involving l.s. planes.
;
 
loop_
 _geom_bond_atom_site_label_1
 _geom_bond_atom_site_label_2
 _geom_bond_distance
 _geom_bond_site_symmetry_2
 _geom_bond_publ_flag
Zr1 O1 2.0988(13) . ?
Zr1 O2 2.1080(13) . ?
Zr1 C34 2.2390(19) . ?
Zr1 C27 2.2440(18) . ?
Zr1 N1 2.2836(14) . ?
Zr1 N2 2.2875(13) . ?
Zr1 C1 2.6244(17) . ?
Zr1 C2 2.6320(16) . ?
O2 C2 1.3055(19) . ?
O1 C1 1.307(2) . ?
N2 C2 1.283(2) . ?
N2 C15 1.408(2) . ?
N1 C1 1.286(2) . ?
N1 C3 1.407(2) . ?
C2 C23 1.513(2) . ?
C16 C17 1.376(2) . ?
C16 C15 1.385(2) . ?
C16 C22 1.483(3) . ?
C1 C11 1.509(2) . ?
C20 C19 1.379(3) . ?
C20 C15 1.382(2) . ?
C20 C21 1.489(3) . ?
C4 C5 1.385(2) . ?
C4 C3 1.391(2) . ?
C4 C9 1.481(3) . ?
C17 C18 1.358(3) . ?
C8 C3 1.382(3) . ?
C8 C7 1.382(3) . ?
C8 C10 1.501(3) . ?
C28 C29 1.379(3) . ?
C28 C33 1.389(3) . ?
C28 C27 1.475(2) . ?
C34 C35 1.471(3) . ?
C29 C30 1.383(3) . ?
C5 C6 1.352(3) . ?
C33 C32 1.366(3) . ?
C19 C18 1.371(3) . ?
C11 C13 1.498(3) . ?
C11 C12 1.520(4) . ?
C11 C14 1.545(3) . ?
C35 C40 1.369(3) . ?
C35 C36 1.390(3) . ?
C7 C6 1.375(3) . ?
C23 C25 1.498(4) . ?
C23 C26 1.511(3) . ?
C23 C24 1.513(4) . ?
C32 C31 1.363(4) . ?
C30 C31 1.357(4) . ?
C36 C37 1.364(4) . ?
C40 C39 1.396(3) . ?
C38 C37 1.358(5) . ?
C38 C39 1.361(5) . ?
 
loop_
 _geom_angle_atom_site_label_1
 _geom_angle_atom_site_label_2
 _geom_angle_atom_site_label_3
 _geom_angle
 _geom_angle_site_symmetry_1
 _geom_angle_site_symmetry_3
 _geom_angle_publ_flag
O1 Zr1 O2 95.75(5) . . ?
O1 Zr1 C34 94.79(7) . . ?
O2 Zr1 C34 139.53(6) . . ?
O1 Zr1 C27 139.85(5) . . ?
O2 Zr1 C27 99.45(7) . . ?
C34 Zr1 C27 97.18(8) . . ?
O1 Zr1 N1 58.78(5) . . ?
O2 Zr1 N1 94.77(5) . . ?
C34 Zr1 N1 123.81(6) . . ?
C27 Zr1 N1 82.98(6) . . ?
O1 Zr1 N2 95.13(5) . . ?
O2 Zr1 N2 58.39(5) . . ?
C34 Zr1 N2 81.82(6) . . ?
C27 Zr1 N2 124.43(6) . . ?
N1 Zr1 N2 142.16(5) . . ?
O1 Zr1 C1 29.55(5) . . ?
O2 Zr1 C1 94.20(5) . . ?
C34 Zr1 C1 113.16(7) . . ?
C27 Zr1 C1 111.95(6) . . ?
N1 Zr1 C1 29.34(5) . . ?
N2 Zr1 C1 119.34(5) . . ?
O1 Zr1 C2 93.75(5) . . ?
O2 Zr1 C2 29.41(5) . . ?
C34 Zr1 C2 110.97(6) . . ?
C27 Zr1 C2 116.96(6) . . ?
N1 Zr1 C2 118.71(5) . . ?
N2 Zr1 C2 29.18(5) . . ?
C1 Zr1 C2 106.65(5) . . ?
C2 O2 Zr1 98.14(10) . . ?
C1 O1 Zr1 98.10(10) . . ?
C2 N2 C15 128.64(13) . . ?
C2 N2 Zr1 90.47(9) . . ?
C15 N2 Zr1 140.42(10) . . ?
C1 N1 C3 128.64(14) . . ?
C1 N1 Zr1 90.19(10) . . ?
C3 N1 Zr1 140.52(10) . . ?
N2 C2 O2 112.29(14) . . ?
N2 C2 C23 132.05(15) . . ?
O2 C2 C23 115.61(15) . . ?
N2 C2 Zr1 60.35(8) . . ?
O2 C2 Zr1 52.45(8) . . ?
C23 C2 Zr1 165.17(12) . . ?
C17 C16 C15 118.81(17) . . ?
C17 C16 C22 120.25(17) . . ?
C15 C16 C22 120.94(15) . . ?
N1 C1 O1 112.55(14) . . ?
N1 C1 C11 131.98(16) . . ?
O1 C1 C11 115.47(15) . . ?
N1 C1 Zr1 60.47(8) . . ?
O1 C1 Zr1 52.35(8) . . ?
C11 C1 Zr1 166.71(12) . . ?
C19 C20 C15 118.04(18) . . ?
C19 C20 C21 120.29(17) . . ?
C15 C20 C21 121.66(16) . . ?
C20 C15 C16 121.16(16) . . ?
C20 C15 N2 120.10(15) . . ?
C16 C15 N2 118.45(14) . . ?
C5 C4 C3 118.48(18) . . ?
C5 C4 C9 120.26(17) . . ?
C3 C4 C9 121.26(16) . . ?
C18 C17 C16 120.8(2) . . ?
C3 C8 C7 117.79(19) . . ?
C3 C8 C10 121.43(17) . . ?
C7 C8 C10 120.8(2) . . ?
C29 C28 C33 116.80(18) . . ?
C29 C28 C27 121.77(19) . . ?
C33 C28 C27 121.38(18) . . ?
C35 C34 Zr1 105.08(12) . . ?
C8 C3 C4 121.46(16) . . ?
C8 C3 N1 119.63(15) . . ?
C4 C3 N1 118.69(16) . . ?
C28 C29 C30 120.6(2) . . ?
C6 C5 C4 120.59(19) . . ?
C28 C27 Zr1 103.79(11) . . ?
C32 C33 C28 121.9(2) . . ?
C18 C19 C20 121.14(19) . . ?
C13 C11 C1 114.92(16) . . ?
C13 C11 C12 109.0(2) . . ?
C1 C11 C12 106.1(2) . . ?
C13 C11 C14 109.9(2) . . ?
C1 C11 C14 105.71(17) . . ?
C12 C11 C14 111.2(2) . . ?
C40 C35 C36 117.0(2) . . ?
C40 C35 C34 121.7(2) . . ?
C36 C35 C34 121.2(2) . . ?
C6 C7 C8 121.1(2) . . ?
C25 C23 C26 110.7(2) . . ?
C25 C23 C2 107.03(19) . . ?
C26 C23 C2 114.82(17) . . ?
C25 C23 C24 108.6(3) . . ?
C26 C23 C24 109.4(2) . . ?
C2 C23 C24 106.07(18) . . ?
C31 C32 C33 120.6(2) . . ?
C31 C30 C29 121.4(2) . . ?
C37 C36 C35 121.6(3) . . ?
C35 C40 C39 121.4(3) . . ?
C17 C18 C19 120.00(18) . . ?
C30 C31 C32 118.7(2) . . ?
C37 C38 C39 119.9(3) . . ?
C5 C6 C7 120.49(19) . . ?
C38 C39 C40 119.5(3) . . ?
C38 C37 C36 120.5(3) . . ?
 
loop_
 _geom_torsion_atom_site_label_1
 _geom_torsion_atom_site_label_2
 _geom_torsion_atom_site_label_3
 _geom_torsion_atom_site_label_4
 _geom_torsion
 _geom_torsion_site_symmetry_1
 _geom_torsion_site_symmetry_2
 _geom_torsion_site_symmetry_3
 _geom_torsion_site_symmetry_4
 _geom_torsion_publ_flag
O1 Zr1 O2 C2 87.44(10) . . . . ?
C34 Zr1 O2 C2 -16.87(15) . . . . ?
C27 Zr1 O2 C2 -129.85(10) . . . . ?
N1 Zr1 O2 C2 146.49(10) . . . . ?
N2 Zr1 O2 C2 -5.06(9) . . . . ?
C1 Zr1 O2 C2 117.06(10) . . . . ?
O2 Zr1 O1 C1 88.38(11) . . . . ?
C34 Zr1 O1 C1 -130.75(12) . . . . ?
C27 Zr1 O1 C1 -23.66(17) . . . . ?
N1 Zr1 O1 C1 -3.72(10) . . . . ?
N2 Zr1 O1 C1 147.06(11) . . . . ?
C2 Zr1 O1 C1 117.82(11) . . . . ?
O1 Zr1 N2 C2 -88.51(10) . . . . ?
O2 Zr1 N2 C2 5.09(9) . . . . ?
C34 Zr1 N2 C2 177.37(11) . . . . ?
C27 Zr1 N2 C2 84.25(12) . . . . ?
N1 Zr1 N2 C2 -45.63(13) . . . . ?
C1 Zr1 N2 C2 -70.60(11) . . . . ?
O1 Zr1 N2 C15 83.35(17) . . . . ?
O2 Zr1 N2 C15 176.96(18) . . . . ?
C34 Zr1 N2 C15 -10.76(17) . . . . ?
C27 Zr1 N2 C15 -103.89(17) . . . . ?
N1 Zr1 N2 C15 126.24(16) . . . . ?
C1 Zr1 N2 C15 101.27(17) . . . . ?
C2 Zr1 N2 C15 171.9(2) . . . . ?
O1 Zr1 N1 C1 3.74(10) . . . . ?
O2 Zr1 N1 C1 -90.10(11) . . . . ?
C34 Zr1 N1 C1 76.98(13) . . . . ?
C27 Zr1 N1 C1 170.95(12) . . . . ?
N2 Zr1 N1 C1 -48.68(14) . . . . ?
C2 Zr1 N1 C1 -72.09(12) . . . . ?
O1 Zr1 N1 C3 174.2(2) . . . . ?
O2 Zr1 N1 C3 80.31(18) . . . . ?
C34 Zr1 N1 C3 -112.61(18) . . . . ?
C27 Zr1 N1 C3 -18.64(18) . . . . ?
N2 Zr1 N1 C3 121.73(17) . . . . ?
C1 Zr1 N1 C3 170.4(2) . . . . ?
C2 Zr1 N1 C3 98.32(18) . . . . ?
C15 N2 C2 O2 179.05(15) . . . . ?
Zr1 N2 C2 O2 -7.58(13) . . . . ?
C15 N2 C2 C23 -3.5(3) . . . . ?
Zr1 N2 C2 C23 169.92(19) . . . . ?
C15 N2 C2 Zr1 -173.37(18) . . . . ?
Zr1 O2 C2 N2 8.31(15) . . . . ?
Zr1 O2 C2 C23 -169.62(13) . . . . ?
O1 Zr1 C2 N2 93.80(10) . . . . ?
O2 Zr1 C2 N2 -171.14(16) . . . . ?
C34 Zr1 C2 N2 -2.78(12) . . . . ?
C27 Zr1 C2 N2 -112.97(11) . . . . ?
N1 Zr1 C2 N2 150.00(9) . . . . ?
C1 Zr1 C2 N2 120.88(10) . . . . ?
O1 Zr1 C2 O2 -95.05(10) . . . . ?
C34 Zr1 C2 O2 168.36(11) . . . . ?
C27 Zr1 C2 O2 58.17(11) . . . . ?
N1 Zr1 C2 O2 -38.85(11) . . . . ?
N2 Zr1 C2 O2 171.14(16) . . . . ?
C1 Zr1 C2 O2 -67.97(11) . . . . ?
O1 Zr1 C2 C23 -55.7(5) . . . . ?
O2 Zr1 C2 C23 39.4(5) . . . . ?
C34 Zr1 C2 C23 -152.3(5) . . . . ?
C27 Zr1 C2 C23 97.6(5) . . . . ?
N1 Zr1 C2 C23 0.5(5) . . . . ?
N2 Zr1 C2 C23 -149.5(5) . . . . ?
C1 Zr1 C2 C23 -28.6(5) . . . . ?
C3 N1 C1 O1 -177.78(16) . . . . ?
Zr1 N1 C1 O1 -5.57(15) . . . . ?
C3 N1 C1 C11 2.1(3) . . . . ?
Zr1 N1 C1 C11 174.3(2) . . . . ?
C3 N1 C1 Zr1 -172.21(19) . . . . ?
Zr1 O1 C1 N1 6.12(17) . . . . ?
Zr1 O1 C1 C11 -173.74(15) . . . . ?
O1 Zr1 C1 N1 -173.50(18) . . . . ?
O2 Zr1 C1 N1 92.26(11) . . . . ?
C34 Zr1 C1 N1 -118.30(11) . . . . ?
C27 Zr1 C1 N1 -9.69(13) . . . . ?
N2 Zr1 C1 N1 148.10(10) . . . . ?
C2 Zr1 C1 N1 119.41(11) . . . . ?
O2 Zr1 C1 O1 -94.25(11) . . . . ?
C34 Zr1 C1 O1 55.20(12) . . . . ?
C27 Zr1 C1 O1 163.80(11) . . . . ?
N1 Zr1 C1 O1 173.50(18) . . . . ?
N2 Zr1 C1 O1 -38.41(13) . . . . ?
C2 Zr1 C1 O1 -67.09(12) . . . . ?
O1 Zr1 C1 C11 25.4(6) . . . . ?
O2 Zr1 C1 C11 -68.9(7) . . . . ?
C34 Zr1 C1 C11 80.6(7) . . . . ?
C27 Zr1 C1 C11 -170.8(7) . . . . ?
N1 Zr1 C1 C11 -161.1(7) . . . . ?
N2 Zr1 C1 C11 -13.0(7) . . . . ?
C2 Zr1 C1 C11 -41.7(7) . . . . ?
C19 C20 C15 C16 2.6(3) . . . . ?
C21 C20 C15 C16 -178.43(17) . . . . ?
C19 C20 C15 N2 176.28(16) . . . . ?
C21 C20 C15 N2 -4.7(3) . . . . ?
C17 C16 C15 C20 -3.4(3) . . . . ?
C22 C16 C15 C20 177.31(17) . . . . ?
C17 C16 C15 N2 -177.19(16) . . . . ?
C22 C16 C15 N2 3.5(2) . . . . ?
C2 N2 C15 C20 95.9(2) . . . . ?
Zr1 N2 C15 C20 -73.6(2) . . . . ?
C2 N2 C15 C16 -90.2(2) . . . . ?
Zr1 N2 C15 C16 100.25(19) . . . . ?
C15 C16 C17 C18 1.7(3) . . . . ?
C22 C16 C17 C18 -179.0(2) . . . . ?
O1 Zr1 C34 C35 71.77(14) . . . . ?
O2 Zr1 C34 C35 176.43(11) . . . . ?
C27 Zr1 C34 C35 -69.83(15) . . . . ?
N1 Zr1 C34 C35 16.51(17) . . . . ?
N2 Zr1 C34 C35 166.28(15) . . . . ?
C1 Zr1 C34 C35 47.80(16) . . . . ?
C2 Zr1 C34 C35 167.65(13) . . . . ?
C7 C8 C3 C4 4.1(3) . . . . ?
C10 C8 C3 C4 -176.81(18) . . . . ?
C7 C8 C3 N1 178.72(18) . . . . ?
C10 C8 C3 N1 -2.2(3) . . . . ?
C5 C4 C3 C8 -3.9(3) . . . . ?
C9 C4 C3 C8 176.07(17) . . . . ?
C5 C4 C3 N1 -178.56(16) . . . . ?
C9 C4 C3 N1 1.5(2) . . . . ?
C1 N1 C3 C8 87.3(2) . . . . ?
Zr1 N1 C3 C8 -80.4(2) . . . . ?
C1 N1 C3 C4 -98.0(2) . . . . ?
Zr1 N1 C3 C4 94.3(2) . . . . ?
C33 C28 C29 C30 -2.2(3) . . . . ?
C27 C28 C29 C30 -179.84(17) . . . . ?
C3 C4 C5 C6 0.9(3) . . . . ?
C9 C4 C5 C6 -179.1(2) . . . . ?
C29 C28 C27 Zr1 96.42(17) . . . . ?
C33 C28 C27 Zr1 -81.14(18) . . . . ?
O1 Zr1 C27 C28 174.76(11) . . . . ?
O2 Zr1 C27 C28 63.98(13) . . . . ?
C34 Zr1 C27 C28 -78.99(14) . . . . ?
N1 Zr1 C27 C28 157.67(14) . . . . ?
N2 Zr1 C27 C28 5.99(16) . . . . ?
C1 Zr1 C27 C28 162.44(12) . . . . ?
C2 Zr1 C27 C28 38.96(15) . . . . ?
C29 C28 C33 C32 2.1(3) . . . . ?
C27 C28 C33 C32 179.79(19) . . . . ?
C15 C20 C19 C18 -0.1(3) . . . . ?
C21 C20 C19 C18 -179.11(19) . . . . ?
N1 C1 C11 C13 4.6(4) . . . . ?
O1 C1 C11 C13 -175.6(2) . . . . ?
Zr1 C1 C11 C13 162.3(6) . . . . ?
N1 C1 C11 C12 125.0(2) . . . . ?
O1 C1 C11 C12 -55.1(2) . . . . ?
Zr1 C1 C11 C12 -77.2(7) . . . . ?
N1 C1 C11 C14 -116.8(3) . . . . ?
O1 C1 C11 C14 63.0(3) . . . . ?
Zr1 C1 C11 C14 41.0(8) . . . . ?
Zr1 C34 C35 C40 -76.1(2) . . . . ?
Zr1 C34 C35 C36 101.60(19) . . . . ?
C3 C8 C7 C6 -1.4(4) . . . . ?
C10 C8 C7 C6 179.5(2) . . . . ?
N2 C2 C23 C25 128.3(3) . . . . ?
O2 C2 C23 C25 -54.2(3) . . . . ?
Zr1 C2 C23 C25 -88.1(5) . . . . ?
N2 C2 C23 C26 5.1(3) . . . . ?
O2 C2 C23 C26 -177.49(19) . . . . ?
Zr1 C2 C23 C26 148.6(4) . . . . ?
N2 C2 C23 C24 -115.9(3) . . . . ?
O2 C2 C23 C24 61.5(3) . . . . ?
Zr1 C2 C23 C24 27.6(6) . . . . ?
C28 C33 C32 C31 -0.7(3) . . . . ?
C28 C29 C30 C31 0.9(3) . . . . ?
C40 C35 C36 C37 -0.2(3) . . . . ?
C34 C35 C36 C37 -178.1(2) . . . . ?
C36 C35 C40 C39 0.8(3) . . . . ?
C34 C35 C40 C39 178.6(2) . . . . ?
C16 C17 C18 C19 0.7(3) . . . . ?
C20 C19 C18 C17 -1.6(3) . . . . ?
C29 C30 C31 C32 0.6(3) . . . . ?
C33 C32 C31 C30 -0.7(3) . . . . ?
C4 C5 C6 C7 1.7(4) . . . . ?
C8 C7 C6 C5 -1.5(4) . . . . ?
C37 C38 C39 C40 -0.8(4) . . . . ?
C35 C40 C39 C38 -0.3(4) . . . . ?
C39 C38 C37 C36 1.3(5) . . . . ?
C35 C36 C37 C38 -0.8(4) . . . . ?
 
_diffrn_measured_fraction_theta_max    0.859
_diffrn_reflns_theta_full              36.55
_diffrn_measured_fraction_theta_full   0.859
_refine_diff_density_max    0.610
_refine_diff_density_min   -0.515
_refine_diff_density_rms    0.083

#===END

 
data_shelxl
 
_audit_creation_method            SHELXL-97
_chemical_name_systematic
;
 ?
;
_chemical_name_common             ?
_chemical_melting_point           ?
_chemical_formula_moiety          'C45 H62 N2 O3 Zr'
_chemical_formula_sum
 'C45 H62 N2 O3 Zr'
_chemical_formula_weight          770.19
 
loop_
 _atom_type_symbol
 _atom_type_description
 _atom_type_scat_dispersion_real
 _atom_type_scat_dispersion_imag
 _atom_type_scat_source
 'C'  'C'   0.0033   0.0016
 'International Tables Vol C Tables 4.2.6.8 and 6.1.1.4'
 'H'  'H'   0.0000   0.0000
 'International Tables Vol C Tables 4.2.6.8 and 6.1.1.4'
 'N'  'N'   0.0061   0.0033
 'International Tables Vol C Tables 4.2.6.8 and 6.1.1.4'
 'O'  'O'   0.0106   0.0060
 'International Tables Vol C Tables 4.2.6.8 and 6.1.1.4'
 'Zr'  'Zr'  -2.9673   0.5597
 'International Tables Vol C Tables 4.2.6.8 and 6.1.1.4'
 
_symmetry_cell_setting            Triclinic
_symmetry_space_group_name_H-M    'P-1'
 
loop_
 _symmetry_equiv_pos_as_xyz
 'x, y, z'
 '-x, -y, -z'
 
_cell_length_a                    8.8174(7)
_cell_length_b                    11.5483(9)
_cell_length_c                    21.155(3)
_cell_angle_alpha                 86.984(10)
_cell_angle_beta                  82.894(9)
_cell_angle_gamma                 69.810(6)
_cell_volume                      2006.2(3)
_cell_formula_units_Z             2
_cell_measurement_temperature     173(2)
_cell_measurement_reflns_used     ?
_cell_measurement_theta_min       2.27
_cell_measurement_theta_max       27.88
 
_exptl_crystal_description        Chip
_exptl_crystal_colour             Yellow
_exptl_crystal_size_max           0.35
_exptl_crystal_size_mid           0.32
_exptl_crystal_size_min           0.30
_exptl_crystal_density_meas       ?
_exptl_crystal_density_diffrn     1.275
_exptl_crystal_density_method     'not measured'
_exptl_crystal_F_000              820
_exptl_absorpt_coefficient_mu     0.315
_exptl_absorpt_correction_type    'Multi-scan'
_exptl_absorpt_correction_T_min   ?
_exptl_absorpt_correction_T_max   ?
_exptl_absorpt_process_details    ?
 
_exptl_special_details
;
 ?
;
 
_diffrn_ambient_temperature       173(2)
_diffrn_radiation_wavelength      0.71080
_diffrn_radiation_type            MoK\a
_diffrn_radiation_source          'fine-focus sealed tube'
_diffrn_radiation_monochromator   graphite
_diffrn_measurement_device_type   'Bruker X8'
_diffrn_measurement_method        ?
_diffrn_detector_area_resol_mean  ?
_diffrn_standards_number          ?
_diffrn_standards_interval_count  ?
_diffrn_standards_interval_time   ?
_diffrn_standards_decay_%         ?
_diffrn_reflns_number             17662
_diffrn_reflns_av_R_equivalents   0.0353
_diffrn_reflns_av_sigmaI/netI     0.0461
_diffrn_reflns_limit_h_min        -11
_diffrn_reflns_limit_h_max        11
_diffrn_reflns_limit_k_min        -15
_diffrn_reflns_limit_k_max        15
_diffrn_reflns_limit_l_min        -26
_diffrn_reflns_limit_l_max        27
_diffrn_reflns_theta_min          2.11
_diffrn_reflns_theta_max          27.88
_reflns_number_total              8114
_reflns_number_gt                 7282
_reflns_threshold_expression      >2sigma(I)
 
_computing_data_collection        ?
_computing_cell_refinement        CrystalClear
_computing_data_reduction         CrystalClear
_computing_structure_solution     SIR-97
_computing_structure_refinement   'SHELXL-97 (Sheldrick, 1997)'
_computing_molecular_graphics     'ORTEP-3 (Farrugia, 1997)'
_computing_publication_material   'PLATON (Spek, 1990)'
 
_refine_special_details
;
 Refinement of F^2^ against ALL reflections.  The weighted R-factor wR and
 goodness of fit S are based on F^2^, conventional R-factors R are based
 on F, with F set to zero for negative F^2^. The threshold expression of
 F^2^ > 2sigma(F^2^) is used only for calculating R-factors(gt) etc. and is
 not relevant to the choice of reflections for refinement.  R-factors based
 on F^2^ are statistically about twice as large as those based on F, and R-
 factors based on ALL data will be even larger.
;
 
_refine_ls_structure_factor_coef  Fsqd
_refine_ls_matrix_type            full
_refine_ls_weighting_scheme       calc
_refine_ls_weighting_details
 'calc w=1/[\s^2^(Fo^2^)+(0.0443P)^2^+2.2295P] where P=(Fo^2^+2Fc^2^)/3'
_atom_sites_solution_primary      direct
_atom_sites_solution_secondary    difmap
_atom_sites_solution_hydrogens    geom
_refine_ls_hydrogen_treatment     mixed
_refine_ls_extinction_method      none
_refine_ls_extinction_coef        ?
_refine_ls_number_reflns          8114
_refine_ls_number_parameters      462
_refine_ls_number_restraints      0
_refine_ls_R_factor_all           0.0494
_refine_ls_R_factor_gt            0.0431
_refine_ls_wR_factor_ref          0.1127
_refine_ls_wR_factor_gt           0.1065
_refine_ls_goodness_of_fit_ref    1.087
_refine_ls_restrained_S_all       1.087
_refine_ls_shift/su_max           0.003
_refine_ls_shift/su_mean          0.000
 
loop_
 _atom_site_label
 _atom_site_type_symbol
 _atom_site_fract_x
 _atom_site_fract_y
 _atom_site_fract_z
 _atom_site_U_iso_or_equiv
 _atom_site_adp_type
 _atom_site_occupancy
 _atom_site_symmetry_multiplicity
 _atom_site_calc_flag
 _atom_site_refinement_flags
 _atom_site_disorder_assembly
 _atom_site_disorder_group
Zr1 Zr 0.25652(3) -0.14177(2) 0.740215(10) 0.01749(8) Uani 1 1 d . . .
O3 O 0.1690(2) -0.29942(16) 0.71960(8) 0.0244(4) Uani 1 1 d . . .
O2 O 0.3609(2) -0.26960(15) 0.81670(8) 0.0225(4) Uani 1 1 d . . .
O1 O 0.1622(2) -0.06953(16) 0.64881(8) 0.0265(4) Uani 1 1 d . . .
N2 N 0.3646(2) -0.08108(18) 0.81403(10) 0.0202(4) Uani 1 1 d . . .
N1 N 0.2385(2) 0.04490(18) 0.70820(10) 0.0212(4) Uani 1 1 d . . .
C2 C 0.4098(3) -0.1899(2) 0.84201(11) 0.0181(4) Uani 1 1 d . . .
C4 C 0.4086(3) 0.1132(2) 0.77377(12) 0.0203(5) Uani 1 1 d . . .
C3 C 0.2655(3) 0.1509(2) 0.73317(12) 0.0227(5) Uani 1 1 d . . .
H3A H 0.1654 0.2007 0.7594 0.027 Uiso 1 1 calc R . .
H3B H 0.2871 0.2034 0.6971 0.027 Uiso 1 1 calc R . .
C25 C 0.5640(4) -0.3324(3) 1.02741(13) 0.0325(6) Uani 1 1 d . . .
H25A H 0.4560 -0.3387 1.0420 0.039 Uiso 1 1 calc R . .
H25B H 0.6333 -0.3611 1.0625 0.039 Uiso 1 1 calc R . .
C28 C -0.0074(3) -0.0805(3) 0.79544(15) 0.0345(6) Uani 1 1 d . . .
H28A H -0.0873 -0.0658 0.7643 0.041 Uiso 1 1 calc R . .
H28B H -0.0174 -0.1487 0.8241 0.041 Uiso 1 1 calc R . .
C24 C 0.6415(3) -0.4128(2) 0.96865(13) 0.0275(5) Uani 1 1 d . . .
H24 H 0.6531 -0.5005 0.9797 0.033 Uiso 1 1 calc R . .
C5 C 0.3813(3) 0.0336(2) 0.83157(12) 0.0225(5) Uani 1 1 d . . .
H5A H 0.4741 0.0142 0.8570 0.027 Uiso 1 1 calc R . .
H5B H 0.2819 0.0817 0.8587 0.027 Uiso 1 1 calc R . .
C8 C 0.1575(3) 0.1253(2) 0.59800(11) 0.0202(5) Uani 1 1 d . . .
C6 C 0.4129(3) 0.2331(2) 0.80056(13) 0.0282(6) Uani 1 1 d . . .
H6A H 0.5056 0.2140 0.8253 0.042 Uiso 1 1 calc R . .
H6B H 0.3118 0.2725 0.8281 0.042 Uiso 1 1 calc R . .
H6C H 0.4241 0.2892 0.7653 0.042 Uiso 1 1 calc R . .
C35 C 0.5044(4) -0.2462(3) 0.67805(15) 0.0344(6) Uani 1 1 d . . .
H35A H 0.5119 -0.1970 0.6388 0.041 Uiso 1 1 calc R . .
H35B H 0.5948 -0.2486 0.7022 0.041 Uiso 1 1 calc R . .
C18 C 0.5137(3) -0.2329(2) 0.89662(11) 0.0186(5) Uani 1 1 d . . .
C10 C 0.0866(4) 0.0784(2) 0.54583(12) 0.0279(6) Uani 1 1 d . . .
H10A H -0.0190 0.0705 0.5633 0.034 Uiso 1 1 calc R . .
H10B H 0.1614 -0.0042 0.5318 0.034 Uiso 1 1 calc R . .
C45 C 0.1826(4) -0.4072(2) 0.76046(15) 0.0321(6) Uani 1 1 d . . .
H45A H 0.1364 -0.3820 0.8047 0.039 Uiso 1 1 calc R . .
H45B H 0.2979 -0.4604 0.7606 0.039 Uiso 1 1 calc R . .
C1 C 0.1856(3) 0.0347(2) 0.65395(11) 0.0212(5) Uani 1 1 d . . .
C14 C 0.2954(4) 0.2263(3) 0.51244(16) 0.0455(8) Uani 1 1 d . . .
H14 H 0.4016 0.2345 0.4945 0.055 Uiso 1 1 calc R . .
C19 C 0.4358(3) -0.1537(2) 0.95629(12) 0.0252(5) Uani 1 1 d . . .
H19A H 0.4206 -0.0661 0.9460 0.030 Uiso 1 1 calc R . .
H19B H 0.3278 -0.1603 0.9704 0.030 Uiso 1 1 calc R . .
C11 C 0.3221(3) 0.1352(3) 0.56905(14) 0.0339(6) Uani 1 1 d . . .
H11A H 0.3715 0.1642 0.6017 0.041 Uiso 1 1 calc R . .
H11B H 0.3973 0.0531 0.5545 0.041 Uiso 1 1 calc R . .
C9 C 0.0365(3) 0.2530(2) 0.61868(12) 0.0274(6) Uani 1 1 d . . .
H9A H -0.0695 0.2456 0.6359 0.033 Uiso 1 1 calc R . .
H9B H 0.0780 0.2855 0.6527 0.033 Uiso 1 1 calc R . .
C36 C 0.5294(3) -0.3724(3) 0.65945(14) 0.0317(6) Uani 1 1 d . . .
C20 C 0.6847(3) -0.2260(3) 0.87548(13) 0.0274(5) Uani 1 1 d . . .
H20A H 0.7353 -0.2784 0.8377 0.033 Uiso 1 1 calc R . .
H20B H 0.6755 -0.1400 0.8636 0.033 Uiso 1 1 calc R . .
C12 C 0.0138(4) 0.3420(2) 0.56136(14) 0.0350(7) Uani 1 1 d . . .
H12 H -0.0633 0.4251 0.5753 0.042 Uiso 1 1 calc R . .
C21 C 0.5329(3) -0.3682(2) 0.91452(12) 0.0230(5) Uani 1 1 d . . .
H21A H 0.4246 -0.3748 0.9283 0.028 Uiso 1 1 calc R . .
H21B H 0.5820 -0.4211 0.8768 0.028 Uiso 1 1 calc R . .
C42 C 0.0589(4) -0.2924(3) 0.67215(15) 0.0356(7) Uani 1 1 d . . .
H42A H 0.1165 -0.2975 0.6286 0.043 Uiso 1 1 calc R . .
H42B H -0.0342 -0.2138 0.6759 0.043 Uiso 1 1 calc R . .
C27 C 0.8088(4) -0.4043(3) 0.94726(16) 0.0378(7) Uani 1 1 d . . .
H27A H 0.8599 -0.4571 0.9097 0.045 Uiso 1 1 calc R . .
H27B H 0.8793 -0.4341 0.9819 0.045 Uiso 1 1 calc R . .
C13 C 0.0618(4) 0.1681(2) 0.48834(12) 0.0289(6) Uani 1 1 d . . .
H13 H 0.0157 0.1362 0.4550 0.035 Uiso 1 1 calc R . .
C37 C 0.6034(4) -0.4745(3) 0.69802(16) 0.0370(7) Uani 1 1 d . . .
H37 H 0.6452 -0.4617 0.7353 0.044 Uiso 1 1 calc R . .
C26 C 0.7117(4) -0.1881(3) 0.98818(15) 0.0390(7) Uani 1 1 d . . .
H26A H 0.7813 -0.2137 1.0233 0.047 Uiso 1 1 calc R . .
H26B H 0.6992 -0.1013 0.9767 0.047 Uiso 1 1 calc R . .
C29 C -0.0479(3) 0.0314(3) 0.83326(14) 0.0315(6) Uani 1 1 d . . .
C15 C 0.1768(5) 0.3525(3) 0.53529(17) 0.0467(9) Uani 1 1 d . . .
H15A H 0.2218 0.3830 0.5689 0.056 Uiso 1 1 calc R . .
H15B H 0.1623 0.4124 0.4994 0.056 Uiso 1 1 calc R . .
C16 C -0.0553(4) 0.2943(3) 0.50975(13) 0.0311(6) Uani 1 1 d . . .
H16A H -0.1621 0.2882 0.5266 0.037 Uiso 1 1 calc R . .
H16B H -0.0712 0.3525 0.4731 0.037 Uiso 1 1 calc R . .
C23 C 0.7922(3) -0.2706(3) 0.93032(15) 0.0368(7) Uani 1 1 d . . .
H23 H 0.9022 -0.2650 0.9167 0.044 Uiso 1 1 calc R . .
C7 C 0.5671(3) 0.0474(3) 0.73299(14) 0.0294(6) Uani 1 1 d . . .
H7A H 0.5884 0.1038 0.6997 0.044 Uiso 1 1 calc R . .
H7B H 0.5587 -0.0247 0.7133 0.044 Uiso 1 1 calc R . .
H7C H 0.6565 0.0206 0.7597 0.044 Uiso 1 1 calc R . .
C22 C 0.5460(4) -0.1982(3) 1.00998(13) 0.0329(6) Uani 1 1 d . . .
H22 H 0.4956 -0.1454 1.0482 0.039 Uiso 1 1 calc R . .
C30 C -0.0135(4) 0.0230(3) 0.89648(16) 0.0431(7) Uani 1 1 d . . .
H30 H 0.0291 -0.0563 0.9155 0.052 Uiso 1 1 calc R . .
C39 C 0.5581(5) -0.6149(3) 0.6290(2) 0.0566(11) Uani 1 1 d . . .
H39 H 0.5658 -0.6962 0.6191 0.068 Uiso 1 1 calc R . .
C32 C -0.1003(5) 0.2411(4) 0.9064(2) 0.0615(12) Uani 1 1 d . . .
H32 H -0.1150 0.3117 0.9308 0.074 Uiso 1 1 calc R . .
C41 C 0.4738(4) -0.3988(3) 0.60444(14) 0.0408(7) Uani 1 1 d . . .
H41 H 0.4246 -0.3331 0.5765 0.049 Uiso 1 1 calc R . .
C43 C 0.0027(6) -0.3979(4) 0.6855(2) 0.0722(15) Uani 1 1 d . . .
H43A H -0.1153 -0.3682 0.7001 0.087 Uiso 1 1 calc R . .
H43B H 0.0210 -0.4462 0.6462 0.087 Uiso 1 1 calc R . .
C17 C 0.2250(4) 0.1783(3) 0.46086(13) 0.0404(7) Uani 1 1 d . . .
H17A H 0.2101 0.2356 0.4238 0.049 Uiso 1 1 calc R . .
H17B H 0.3009 0.0965 0.4463 0.049 Uiso 1 1 calc R . .
C31 C -0.0394(4) 0.1257(4) 0.93189(19) 0.0552(10) Uani 1 1 d . . .
H31 H -0.0146 0.1162 0.9747 0.066 Uiso 1 1 calc R . .
C34 C -0.1142(4) 0.1495(3) 0.80797(17) 0.0407(7) Uani 1 1 d . . .
H34 H -0.1420 0.1594 0.7656 0.049 Uiso 1 1 calc R . .
C44 C 0.0894(6) -0.4730(4) 0.7331(2) 0.0747(15) Uani 1 1 d . . .
H44A H 0.1645 -0.5519 0.7145 0.090 Uiso 1 1 calc R . .
H44B H 0.0128 -0.4917 0.7669 0.090 Uiso 1 1 calc R . .
C33 C -0.1404(4) 0.2542(3) 0.8444(2) 0.0580(11) Uani 1 1 d . . .
H33 H -0.1858 0.3342 0.8266 0.070 Uiso 1 1 calc R . .
C40 C 0.4888(5) -0.5182(4) 0.58976(17) 0.0531(10) Uani 1 1 d . . .
H40 H 0.4503 -0.5329 0.5520 0.064 Uiso 1 1 calc R . .
C38 C 0.6168(4) -0.5936(3) 0.68303(19) 0.0485(9) Uani 1 1 d . . .
H38 H 0.6666 -0.6606 0.7102 0.058 Uiso 1 1 calc R . .
 
loop_
 _atom_site_aniso_label
 _atom_site_aniso_U_11
 _atom_site_aniso_U_22
 _atom_site_aniso_U_33
 _atom_site_aniso_U_23
 _atom_site_aniso_U_13
 _atom_site_aniso_U_12
Zr1 0.01832(13) 0.01639(13) 0.01980(12) 0.00514(9) -0.00629(8) -0.00788(9)
O3 0.0285(9) 0.0221(9) 0.0277(9) 0.0055(7) -0.0089(7) -0.0142(7)
O2 0.0282(9) 0.0193(8) 0.0243(8) 0.0066(7) -0.0114(7) -0.0117(7)
O1 0.0387(11) 0.0209(9) 0.0263(9) 0.0088(7) -0.0140(8) -0.0162(8)
N2 0.0219(10) 0.0180(10) 0.0229(10) 0.0060(8) -0.0090(8) -0.0082(8)
N1 0.0226(10) 0.0186(10) 0.0248(10) 0.0070(8) -0.0087(8) -0.0090(8)
C2 0.0162(11) 0.0189(11) 0.0194(10) 0.0033(9) -0.0034(8) -0.0062(9)
C4 0.0207(12) 0.0168(11) 0.0256(11) 0.0058(9) -0.0077(9) -0.0085(9)
C3 0.0249(12) 0.0191(11) 0.0273(12) 0.0052(10) -0.0112(10) -0.0097(10)
C25 0.0428(16) 0.0322(14) 0.0247(12) 0.0105(11) -0.0148(11) -0.0135(13)
C28 0.0191(13) 0.0333(15) 0.0505(17) -0.0038(13) 0.0033(12) -0.0101(11)
C24 0.0332(14) 0.0219(12) 0.0284(13) 0.0097(10) -0.0142(11) -0.0083(11)
C5 0.0258(12) 0.0201(12) 0.0246(11) 0.0044(10) -0.0082(9) -0.0104(10)
C8 0.0218(12) 0.0167(11) 0.0220(11) 0.0056(9) -0.0057(9) -0.0064(9)
C6 0.0361(15) 0.0214(12) 0.0333(13) 0.0083(11) -0.0157(11) -0.0146(11)
C35 0.0292(15) 0.0304(14) 0.0387(15) 0.0012(12) 0.0082(12) -0.0082(12)
C18 0.0188(11) 0.0179(11) 0.0193(10) 0.0038(9) -0.0057(8) -0.0058(9)
C10 0.0422(16) 0.0214(12) 0.0229(12) 0.0059(10) -0.0091(11) -0.0134(12)
C45 0.0374(16) 0.0218(12) 0.0422(15) 0.0132(12) -0.0141(12) -0.0150(12)
C1 0.0208(12) 0.0206(11) 0.0232(11) 0.0056(10) -0.0071(9) -0.0076(10)
C14 0.0345(17) 0.063(2) 0.0434(17) 0.0332(16) -0.0086(13) -0.0255(16)
C19 0.0298(13) 0.0226(12) 0.0215(11) 0.0022(10) -0.0059(10) -0.0062(10)
C11 0.0228(14) 0.0417(16) 0.0353(14) 0.0173(13) -0.0058(11) -0.0104(12)
C9 0.0301(14) 0.0226(12) 0.0238(12) 0.0026(10) -0.0124(10) 0.0010(11)
C36 0.0258(14) 0.0315(14) 0.0350(14) 0.0004(12) 0.0091(11) -0.0106(11)
C20 0.0180(12) 0.0316(14) 0.0321(13) 0.0096(11) -0.0060(10) -0.0080(11)
C12 0.0498(18) 0.0170(12) 0.0337(14) 0.0040(11) -0.0225(13) -0.0005(12)
C21 0.0288(13) 0.0189(11) 0.0237(11) 0.0058(10) -0.0098(10) -0.0097(10)
C42 0.0470(17) 0.0349(15) 0.0363(15) 0.0063(13) -0.0229(13) -0.0231(14)
C27 0.0275(15) 0.0354(16) 0.0461(17) 0.0124(13) -0.0170(12) -0.0027(12)
C13 0.0447(16) 0.0232(13) 0.0211(12) 0.0060(10) -0.0114(11) -0.0128(12)
C37 0.0259(14) 0.0336(15) 0.0451(17) 0.0020(13) 0.0056(12) -0.0057(12)
C26 0.0499(18) 0.0353(15) 0.0444(17) 0.0131(13) -0.0300(14) -0.0242(14)
C29 0.0130(12) 0.0368(15) 0.0438(16) -0.0047(13) 0.0038(10) -0.0093(11)
C15 0.071(2) 0.0355(16) 0.0502(19) 0.0289(15) -0.0346(17) -0.0344(17)
C16 0.0340(15) 0.0306(14) 0.0257(12) 0.0071(11) -0.0144(11) -0.0047(12)
C23 0.0214(13) 0.0424(17) 0.0499(17) 0.0150(14) -0.0176(12) -0.0129(12)
C7 0.0178(12) 0.0297(14) 0.0422(15) 0.0049(12) -0.0038(11) -0.0106(11)
C22 0.0487(17) 0.0274(14) 0.0241(12) 0.0016(11) -0.0151(12) -0.0114(13)
C30 0.0295(16) 0.053(2) 0.0437(17) -0.0031(15) 0.0053(13) -0.0131(14)
C39 0.056(2) 0.0389(18) 0.075(3) -0.0187(19) 0.032(2) -0.0264(17)
C32 0.043(2) 0.066(3) 0.078(3) -0.041(2) 0.0225(19) -0.0263(19)
C41 0.0425(18) 0.0508(19) 0.0311(14) 0.0030(14) 0.0072(12) -0.0227(15)
C43 0.098(3) 0.068(3) 0.091(3) 0.041(2) -0.068(3) -0.066(3)
C17 0.0404(17) 0.0437(17) 0.0263(13) 0.0139(13) 0.0013(12) -0.0043(14)
C31 0.0399(19) 0.076(3) 0.052(2) -0.023(2) 0.0109(15) -0.0243(19)
C34 0.0244(14) 0.0346(16) 0.058(2) -0.0009(14) -0.0002(13) -0.0051(12)
C44 0.115(4) 0.053(2) 0.094(3) 0.040(2) -0.073(3) -0.063(3)
C33 0.0347(18) 0.0322(17) 0.098(3) -0.0059(19) 0.0099(19) -0.0050(14)
C40 0.058(2) 0.069(2) 0.0432(18) -0.0209(18) 0.0204(16) -0.042(2)
C38 0.0360(18) 0.0301(16) 0.069(2) 0.0037(16) 0.0142(16) -0.0056(14)
 
_geom_special_details
;
 All esds (except the esd in the dihedral angle between two l.s. planes)
 are estimated using the full covariance matrix.  The cell esds are taken
 into account individually in the estimation of esds in distances, angles
 and torsion angles; correlations between esds in cell parameters are only
 used when they are defined by crystal symmetry.  An approximate (isotropic)
 treatment of cell esds is used for estimating esds involving l.s. planes.
;
 
loop_
 _geom_bond_atom_site_label_1
 _geom_bond_atom_site_label_2
 _geom_bond_distance
 _geom_bond_site_symmetry_2
 _geom_bond_publ_flag
Zr1 N1 2.183(2) . ?
Zr1 N2 2.1867(19) . ?
Zr1 O2 2.1962(17) . ?
Zr1 O1 2.2083(17) . ?
Zr1 O3 2.2887(17) . ?
Zr1 C28 2.358(3) . ?
Zr1 C35 2.366(3) . ?
Zr1 C2 2.617(2) . ?
Zr1 C1 2.624(2) . ?
O3 C45 1.456(3) . ?
O3 C42 1.461(3) . ?
O2 C2 1.305(3) . ?
O1 C1 1.302(3) . ?
N2 C2 1.313(3) . ?
N2 C5 1.454(3) . ?
N1 C1 1.317(3) . ?
N1 C3 1.461(3) . ?
C2 C18 1.519(3) . ?
C4 C7 1.521(4) . ?
C4 C5 1.536(3) . ?
C4 C6 1.537(3) . ?
C4 C3 1.540(3) . ?
C25 C22 1.532(4) . ?
C25 C24 1.532(4) . ?
C28 C29 1.469(4) . ?
C24 C27 1.523(4) . ?
C24 C21 1.537(3) . ?
C8 C1 1.523(3) . ?
C8 C10 1.540(3) . ?
C8 C9 1.540(3) . ?
C8 C11 1.543(4) . ?
C35 C36 1.464(4) . ?
C18 C19 1.541(3) . ?
C18 C21 1.544(3) . ?
C18 C20 1.547(3) . ?
C10 C13 1.542(3) . ?
C45 C44 1.478(4) . ?
C14 C15 1.532(5) . ?
C14 C17 1.533(5) . ?
C14 C11 1.537(4) . ?
C19 C22 1.538(3) . ?
C9 C12 1.534(4) . ?
C36 C41 1.403(4) . ?
C36 C37 1.408(4) . ?
C20 C23 1.543(4) . ?
C12 C15 1.518(5) . ?
C12 C16 1.524(4) . ?
C42 C43 1.469(4) . ?
C27 C23 1.527(4) . ?
C13 C16 1.520(4) . ?
C13 C17 1.525(4) . ?
C37 C38 1.389(5) . ?
C26 C22 1.519(5) . ?
C26 C23 1.534(5) . ?
C29 C34 1.392(4) . ?
C29 C30 1.399(4) . ?
C30 C31 1.373(5) . ?
C39 C40 1.365(6) . ?
C39 C38 1.379(6) . ?
C32 C31 1.363(6) . ?
C32 C33 1.387(6) . ?
C41 C40 1.388(5) . ?
C43 C44 1.413(5) . ?
C34 C33 1.404(5) . ?
 
loop_
 _geom_angle_atom_site_label_1
 _geom_angle_atom_site_label_2
 _geom_angle_atom_site_label_3
 _geom_angle
 _geom_angle_site_symmetry_1
 _geom_angle_site_symmetry_3
 _geom_angle_publ_flag
N1 Zr1 N2 77.74(7) . . ?
N1 Zr1 O2 137.43(7) . . ?
N2 Zr1 O2 59.84(7) . . ?
N1 Zr1 O1 59.68(7) . . ?
N2 Zr1 O1 137.25(7) . . ?
O2 Zr1 O1 161.62(7) . . ?
N1 Zr1 O3 141.16(7) . . ?
N2 Zr1 O3 140.18(7) . . ?
O2 Zr1 O3 81.29(6) . . ?
O1 Zr1 O3 82.46(6) . . ?
N1 Zr1 C28 94.31(9) . . ?
N2 Zr1 C28 94.87(9) . . ?
O2 Zr1 C28 92.75(9) . . ?
O1 Zr1 C28 92.09(10) . . ?
O3 Zr1 C28 77.59(8) . . ?
N1 Zr1 C35 96.99(9) . . ?
N2 Zr1 C35 96.27(10) . . ?
O2 Zr1 C35 84.98(9) . . ?
O1 Zr1 C35 85.92(9) . . ?
O3 Zr1 C35 87.97(9) . . ?
C28 Zr1 C35 165.57(10) . . ?
N1 Zr1 C2 107.59(7) . . ?
N2 Zr1 C2 30.04(7) . . ?
O2 Zr1 C2 29.86(7) . . ?
O1 Zr1 C2 165.59(7) . . ?
O3 Zr1 C2 110.98(7) . . ?
C28 Zr1 C2 95.82(9) . . ?
C35 Zr1 C2 89.31(9) . . ?
N1 Zr1 C1 30.04(7) . . ?
N2 Zr1 C1 107.59(7) . . ?
O2 Zr1 C1 165.87(7) . . ?
O1 Zr1 C1 29.69(7) . . ?
O3 Zr1 C1 111.95(7) . . ?
C28 Zr1 C1 94.93(10) . . ?
C35 Zr1 C1 90.42(9) . . ?
C2 Zr1 C1 137.03(7) . . ?
C45 O3 C42 109.66(19) . . ?
C45 O3 Zr1 124.94(15) . . ?
C42 O3 Zr1 123.99(15) . . ?
C2 O2 Zr1 93.23(13) . . ?
C1 O1 Zr1 93.15(13) . . ?
C2 N2 C5 129.8(2) . . ?
C2 N2 Zr1 93.45(14) . . ?
C5 N2 Zr1 136.71(15) . . ?
C1 N1 C3 129.0(2) . . ?
C1 N1 Zr1 93.85(15) . . ?
C3 N1 Zr1 137.17(15) . . ?
O2 C2 N2 113.3(2) . . ?
O2 C2 C18 118.3(2) . . ?
N2 C2 C18 128.4(2) . . ?
O2 C2 Zr1 56.91(11) . . ?
N2 C2 Zr1 56.51(12) . . ?
C18 C2 Zr1 172.53(16) . . ?
C7 C4 C5 111.1(2) . . ?
C7 C4 C6 110.6(2) . . ?
C5 C4 C6 106.4(2) . . ?
C7 C4 C3 110.3(2) . . ?
C5 C4 C3 111.8(2) . . ?
C6 C4 C3 106.49(19) . . ?
N1 C3 C4 112.75(19) . . ?
C22 C25 C24 109.0(2) . . ?
C29 C28 Zr1 113.52(18) . . ?
C27 C24 C25 109.5(2) . . ?
C27 C24 C21 109.7(2) . . ?
C25 C24 C21 109.6(2) . . ?
N2 C5 C4 113.2(2) . . ?
C1 C8 C10 110.27(19) . . ?
C1 C8 C9 111.3(2) . . ?
C10 C8 C9 107.7(2) . . ?
C1 C8 C11 109.01(19) . . ?
C10 C8 C11 107.9(2) . . ?
C9 C8 C11 110.6(2) . . ?
C36 C35 Zr1 116.58(19) . . ?
C2 C18 C19 111.30(19) . . ?
C2 C18 C21 110.13(19) . . ?
C19 C18 C21 108.0(2) . . ?
C2 C18 C20 109.21(19) . . ?
C19 C18 C20 109.9(2) . . ?
C21 C18 C20 108.2(2) . . ?
C8 C10 C13 110.5(2) . . ?
O3 C45 C44 105.5(2) . . ?
O1 C1 N1 113.2(2) . . ?
O1 C1 C8 118.6(2) . . ?
N1 C1 C8 128.2(2) . . ?
O1 C1 Zr1 57.16(11) . . ?
N1 C1 Zr1 56.11(12) . . ?
C8 C1 Zr1 172.97(17) . . ?
C15 C14 C17 109.7(3) . . ?
C15 C14 C11 109.3(3) . . ?
C17 C14 C11 109.5(3) . . ?
C22 C19 C18 109.8(2) . . ?
C14 C11 C8 109.5(2) . . ?
C12 C9 C8 109.7(2) . . ?
C41 C36 C37 115.9(3) . . ?
C41 C36 C35 122.5(3) . . ?
C37 C36 C35 121.5(3) . . ?
C23 C20 C18 109.8(2) . . ?
C15 C12 C16 109.8(3) . . ?
C15 C12 C9 109.3(2) . . ?
C16 C12 C9 109.9(2) . . ?
C24 C21 C18 110.15(19) . . ?
O3 C42 C43 105.9(2) . . ?
C24 C27 C23 109.7(2) . . ?
C16 C13 C17 109.7(2) . . ?
C16 C13 C10 109.4(2) . . ?
C17 C13 C10 109.4(2) . . ?
C38 C37 C36 121.8(3) . . ?
C22 C26 C23 109.9(2) . . ?
C34 C29 C30 116.9(3) . . ?
C34 C29 C28 122.6(3) . . ?
C30 C29 C28 120.5(3) . . ?
C12 C15 C14 110.0(2) . . ?
C13 C16 C12 109.4(2) . . ?
C27 C23 C26 110.0(3) . . ?
C27 C23 C20 109.3(2) . . ?
C26 C23 C20 108.8(2) . . ?
C26 C22 C25 110.0(2) . . ?
C26 C22 C19 109.6(2) . . ?
C25 C22 C19 109.5(2) . . ?
C31 C30 C29 122.1(4) . . ?
C40 C39 C38 119.4(3) . . ?
C31 C32 C33 119.2(3) . . ?
C40 C41 C36 121.8(3) . . ?
C44 C43 C42 109.0(3) . . ?
C13 C17 C14 109.1(2) . . ?
C32 C31 C30 120.8(4) . . ?
C29 C34 C33 120.7(3) . . ?
C43 C44 C45 108.9(3) . . ?
C32 C33 C34 120.2(4) . . ?
C39 C40 C41 120.8(4) . . ?
C39 C38 C37 120.3(3) . . ?
 
_diffrn_measured_fraction_theta_max    0.847
_diffrn_reflns_theta_full              27.88
_diffrn_measured_fraction_theta_full   0.847
_refine_diff_density_max    1.009
_refine_diff_density_min   -1.023
_refine_diff_density_rms    0.076

#===END

data_rt2-123
 
_audit_creation_method            SHELXL-97
_chemical_name_systematic
;
 ?
;
_chemical_name_common             ?
_chemical_melting_point           ?
_chemical_formula_moiety          'C45 H62 Hf N2 O3'
_chemical_formula_sum
 'C45 H62 Hf N2 O3'
_chemical_formula_weight          857.46
 
loop_
 _atom_type_symbol
 _atom_type_description
 _atom_type_scat_dispersion_real
 _atom_type_scat_dispersion_imag
 _atom_type_scat_source
 'C'  'C'   0.0033   0.0016
 'International Tables Vol C Tables 4.2.6.8 and 6.1.1.4'
 'H'  'H'   0.0000   0.0000
 'International Tables Vol C Tables 4.2.6.8 and 6.1.1.4'
 'N'  'N'   0.0061   0.0033
 'International Tables Vol C Tables 4.2.6.8 and 6.1.1.4'
 'O'  'O'   0.0106   0.0060
 'International Tables Vol C Tables 4.2.6.8 and 6.1.1.4'
 'Hf'  'Hf'  -0.5830   6.1852
 'International Tables Vol C Tables 4.2.6.8 and 6.1.1.4'
 
_symmetry_cell_setting            Triclinic
_symmetry_space_group_name_H-M    P-1
 
loop_
 _symmetry_equiv_pos_as_xyz
 'x, y, z'
 '-x, -y, -z'
 
_cell_length_a                    11.4687(12)
_cell_length_b                    17.4135(18)
_cell_length_c                    22.171(2)
_cell_angle_alpha                 103.5860(10)
_cell_angle_beta                  94.322(2)
_cell_angle_gamma                 109.066(3)
_cell_volume                      4011.6(7)
_cell_formula_units_Z             4
_cell_measurement_temperature     173(2)
_cell_measurement_reflns_used     ?
_cell_measurement_theta_min       2.27
_cell_measurement_theta_max       27.88
 
_exptl_crystal_description        Prism
_exptl_crystal_colour             Yellow
_exptl_crystal_size_max           0.37
_exptl_crystal_size_mid           0.35
_exptl_crystal_size_min           0.30
_exptl_crystal_density_meas       ?
_exptl_crystal_density_diffrn     1.420
_exptl_crystal_density_method     'not measured'
_exptl_crystal_F_000              1768
_exptl_absorpt_coefficient_mu     2.642
_exptl_absorpt_correction_type    'Multi-scan'
_exptl_absorpt_correction_T_min   0.4415
_exptl_absorpt_correction_T_max   0.5046
_exptl_absorpt_process_details    ?
 
_exptl_special_details
;
 ?
;
 
_diffrn_ambient_temperature       173(2)
_diffrn_radiation_wavelength      0.71080
_diffrn_radiation_type            MoK\a
_diffrn_radiation_source          'fine-focus sealed tube'
_diffrn_radiation_monochromator   graphite
_diffrn_measurement_device_type   'Bruker X8'
_diffrn_measurement_method        ?
_diffrn_detector_area_resol_mean  ?
_diffrn_standards_number          ?
_diffrn_standards_interval_count  ?
_diffrn_standards_interval_time   ?
_diffrn_standards_decay_%         ?
_diffrn_reflns_number             35599
_diffrn_reflns_av_R_equivalents   0.0281
_diffrn_reflns_av_sigmaI/netI     0.0407
_diffrn_reflns_limit_h_min        -14
_diffrn_reflns_limit_h_max        12
_diffrn_reflns_limit_k_min        -22
_diffrn_reflns_limit_k_max        22
_diffrn_reflns_limit_l_min        -27
_diffrn_reflns_limit_l_max        26
_diffrn_reflns_theta_min          2.27
_diffrn_reflns_theta_max          27.88
_reflns_number_total              16302
_reflns_number_gt                 13738
_reflns_threshold_expression      >2sigma(I)
 
_computing_data_collection        ?
_computing_cell_refinement        CrystalClear
_computing_data_reduction         CrystalClear
_computing_structure_solution     SIR-97
_computing_structure_refinement   'SHELXL-97 (Sheldrick, 1997)'
_computing_molecular_graphics     'ORTEP-3 (Farrugia, 1997)'
_computing_publication_material   'PLATON (Spek, 1990)'
 
_refine_special_details
;
 Refinement of F^2^ against ALL reflections.  The weighted R-factor wR and
 goodness of fit S are based on F^2^, conventional R-factors R are based
 on F, with F set to zero for negative F^2^. The threshold expression of
 F^2^ > 2sigma(F^2^) is used only for calculating R-factors(gt) etc. and is
 not relevant to the choice of reflections for refinement.  R-factors based
 on F^2^ are statistically about twice as large as those based on F, and R-
 factors based on ALL data will be even larger.
;
 
_refine_ls_structure_factor_coef  Fsqd
_refine_ls_matrix_type            full
_refine_ls_weighting_scheme       calc
_refine_ls_weighting_details
 'calc w=1/[\s^2^(Fo^2^)+(0.0285P)^2^+5.3718P] where P=(Fo^2^+2Fc^2^)/3'
_atom_sites_solution_primary      direct
_atom_sites_solution_secondary    difmap
_atom_sites_solution_hydrogens    geom
_refine_ls_hydrogen_treatment     mixed
_refine_ls_extinction_method      none
_refine_ls_extinction_coef        ?
_refine_ls_number_reflns          16302
_refine_ls_number_parameters      923
_refine_ls_number_restraints      0
_refine_ls_R_factor_all           0.0368
_refine_ls_R_factor_gt            0.0289
_refine_ls_wR_factor_ref          0.0749
_refine_ls_wR_factor_gt           0.0695
_refine_ls_goodness_of_fit_ref    1.069
_refine_ls_restrained_S_all       1.069
_refine_ls_shift/su_max           0.003
_refine_ls_shift/su_mean          0.000
 
loop_
 _atom_site_label
 _atom_site_type_symbol
 _atom_site_fract_x
 _atom_site_fract_y
 _atom_site_fract_z
 _atom_site_U_iso_or_equiv
 _atom_site_adp_type
 _atom_site_occupancy
 _atom_site_symmetry_multiplicity
 _atom_site_calc_flag
 _atom_site_refinement_flags
 _atom_site_disorder_assembly
 _atom_site_disorder_group
Hf2 Hf 0.353169(10) 0.495712(7) 0.237463(5) 0.00975(4) Uani 1 1 d . . .
Hf1 Hf 0.133365(10) 0.998255(7) 0.755719(5) 0.01023(4) Uani 1 1 d . . .
O5 O 0.32954(19) 0.40326(14) 0.14716(11) 0.0172(5) Uani 1 1 d . . .
O4 O 0.31470(19) 0.58565(13) 0.31253(11) 0.0158(5) Uani 1 1 d . . .
O1 O 0.15344(19) 1.08668(15) 0.84775(11) 0.0189(5) Uani 1 1 d . . .
O3 O 0.34412(18) 1.05211(13) 0.77805(11) 0.0159(5) Uani 1 1 d . . .
O6 O 0.14266(18) 0.44065(13) 0.21676(11) 0.0161(5) Uani 1 1 d . . .
C39 C 0.5014(4) 0.9044(3) 0.8694(2) 0.0417(11) Uani 1 1 d . . .
H39 H 0.5842 0.9070 0.8817 0.050 Uiso 1 1 calc R . .
C32 C -0.1461(4) 1.0976(3) 0.5909(3) 0.0517(14) Uani 1 1 d . . .
H32 H -0.2201 1.0934 0.5659 0.062 Uiso 1 1 calc R . .
N4 N 0.5141(2) 0.47014(16) 0.20481(12) 0.0125(5) Uani 1 1 d . . .
N3 N 0.5051(2) 0.58589(15) 0.31056(12) 0.0136(5) Uani 1 1 d . . .
O2 O 0.17386(19) 0.91090(14) 0.67948(11) 0.0162(5) Uani 1 1 d . . .
C75 C 0.6401(4) 0.4010(3) 0.4054(2) 0.0407(11) Uani 1 1 d . . .
H75 H 0.7140 0.4048 0.4303 0.049 Uiso 1 1 calc R . .
C41 C 0.3080(3) 0.8440(2) 0.79612(19) 0.0261(8) Uani 1 1 d . . .
H41 H 0.2598 0.8045 0.7579 0.031 Uiso 1 1 calc R . .
C74 C 0.5646(4) 0.4428(3) 0.4308(2) 0.0370(10) Uani 1 1 d . . .
H74 H 0.5860 0.4754 0.4736 0.044 Uiso 1 1 calc R . .
C44 C 0.5551(4) 1.0835(3) 0.7684(3) 0.0551(16) Uani 1 1 d . . .
H44A H 0.5952 1.0550 0.7926 0.066 Uiso 1 1 calc R . .
H44B H 0.6070 1.0999 0.7366 0.066 Uiso 1 1 calc R . .
C87 C -0.0634(4) 0.3974(3) 0.2376(3) 0.0563(16) Uani 1 1 d . . .
H87A H -0.0754 0.3628 0.2678 0.068 Uiso 1 1 calc R . .
H87B H -0.1319 0.4201 0.2364 0.068 Uiso 1 1 calc R . .
C86 C -0.0636(3) 0.3466(3) 0.1756(2) 0.0477(13) Uani 1 1 d . . .
H86A H -0.1044 0.3637 0.1427 0.057 Uiso 1 1 calc R . .
H86B H -0.1095 0.2860 0.1712 0.057 Uiso 1 1 calc R . .
C71 C 0.3135(3) 0.3921(2) 0.29151(17) 0.0203(7) Uani 1 1 d . . .
H71A H 0.2510 0.3994 0.3187 0.024 Uiso 1 1 calc R . .
H71B H 0.2750 0.3361 0.2603 0.024 Uiso 1 1 calc R . .
N2 N -0.0172(2) 0.90962(15) 0.68116(12) 0.0129(5) Uani 1 1 d . . .
N1 N -0.0281(2) 1.02393(16) 0.78680(12) 0.0130(5) Uani 1 1 d . . .
C13 C -0.1595(4) 1.0857(3) 0.9759(2) 0.0385(10) Uani 1 1 d . . .
H13 H -0.2191 1.0405 0.9908 0.046 Uiso 1 1 calc R . .
C40 C 0.4290(4) 0.8477(3) 0.8145(2) 0.0363(10) Uani 1 1 d . . .
H40 H 0.4619 0.8106 0.7888 0.044 Uiso 1 1 calc R . .
C33 C -0.0730(4) 1.0538(3) 0.5664(2) 0.0431(11) Uani 1 1 d . . .
H33 H -0.0956 1.0197 0.5241 0.052 Uiso 1 1 calc R . .
C3 C -0.1605(3) 0.99882(19) 0.76025(16) 0.0151(6) Uani 1 1 d . . .
H3A H -0.1690 1.0366 0.7345 0.018 Uiso 1 1 calc R . .
H3B H -0.2085 1.0063 0.7951 0.018 Uiso 1 1 calc R . .
C027 C 0.4489(3) 0.41683(18) 0.15134(15) 0.0128(6) Uani 1 1 d . . .
C2 C 0.0562(3) 0.87290(18) 0.65362(14) 0.0116(6) Uani 1 1 d . . .
C15 C -0.0513(5) 1.1422(3) 1.02990(19) 0.0415(11) Uani 1 1 d . . .
H15A H -0.0848 1.1679 1.0661 0.050 Uiso 1 1 calc R . .
H15B H -0.0070 1.1077 1.0439 0.050 Uiso 1 1 calc R . .
C7 C -0.3526(3) 0.8918(2) 0.69254(16) 0.0194(7) Uani 1 1 d . . .
H7A H -0.3927 0.8330 0.6671 0.029 Uiso 1 1 calc R . .
H7B H -0.3531 0.9297 0.6662 0.029 Uiso 1 1 calc R . .
H7C H -0.3986 0.9029 0.7271 0.029 Uiso 1 1 calc R . .
C65 C 0.4320(3) 0.2704(2) -0.01289(16) 0.0221(7) Uani 1 1 d . . .
H65 H 0.3589 0.2300 -0.0453 0.026 Uiso 1 1 calc R . .
C80 C 0.1810(4) 0.6505(2) 0.1964(2) 0.0291(8) Uani 1 1 d . . .
H80 H 0.2332 0.6904 0.2334 0.035 Uiso 1 1 calc R . .
C61 C 0.4965(3) 0.37446(19) 0.09543(14) 0.0133(6) Uani 1 1 d . . .
C12 C 0.0393(3) 1.2113(3) 1.00773(17) 0.0292(8) Uani 1 1 d . . .
H12 H 0.1101 1.2475 1.0428 0.035 Uiso 1 1 calc R . .
C78 C 0.3518(3) 0.5913(2) 0.17796(18) 0.0233(7) Uani 1 1 d . . .
H78A H 0.4069 0.6487 0.2030 0.028 Uiso 1 1 calc R . .
H78B H 0.3881 0.5763 0.1397 0.028 Uiso 1 1 calc R . .
C42 C 0.4164(3) 1.1309(2) 0.82615(18) 0.0262(8) Uani 1 1 d . . .
H42A H 0.4187 1.1216 0.8685 0.031 Uiso 1 1 calc R . .
H42B H 0.3792 1.1747 0.8255 0.031 Uiso 1 1 calc R . .
C1 C 0.0334(3) 1.07432(19) 0.84193(15) 0.0136(6) Uani 1 1 d . . .
C28 C 0.1792(3) 1.1055(2) 0.70476(18) 0.0237(7) Uani 1 1 d . . .
H28A H 0.2178 1.1607 0.7370 0.028 Uiso 1 1 calc R . .
H28B H 0.2420 1.0988 0.6777 0.028 Uiso 1 1 calc R . .
C62 C 0.5744(3) 0.3240(2) 0.11453(16) 0.0199(7) Uani 1 1 d . . .
H62A H 0.6456 0.3619 0.1480 0.024 Uiso 1 1 calc R . .
H62B H 0.5219 0.2787 0.1312 0.024 Uiso 1 1 calc R . .
C27 C 0.0311(3) 0.7008(2) 0.47078(17) 0.0255(8) Uani 1 1 d . . .
H27A H 0.0847 0.7474 0.4557 0.031 Uiso 1 1 calc R . .
H27B H 0.0071 0.6477 0.4366 0.031 Uiso 1 1 calc R . .
C19 C -0.0624(3) 0.7174(2) 0.62125(17) 0.0201(7) Uani 1 1 d . . .
H19A H -0.0164 0.7117 0.6586 0.024 Uiso 1 1 calc R . .
H19B H -0.1386 0.7277 0.6331 0.024 Uiso 1 1 calc R . .
C66 C 0.6209(4) 0.4012(2) 0.0088(2) 0.0320(9) Uani 1 1 d . . .
H66 H 0.6723 0.4458 -0.0095 0.038 Uiso 1 1 calc R . .
C21 C 0.1398(3) 0.7754(2) 0.58226(16) 0.0175(7) Uani 1 1 d . . .
H21A H 0.1944 0.8231 0.5686 0.021 Uiso 1 1 calc R . .
H21B H 0.1869 0.7704 0.6195 0.021 Uiso 1 1 calc R . .
C51 C 0.4699(3) 0.70254(18) 0.39273(14) 0.0128(6) Uani 1 1 d . . .
C47 C 0.7040(3) 0.58810(18) 0.27077(15) 0.0137(6) Uani 1 1 d . . .
C52 C 0.5542(3) 0.77826(19) 0.37258(16) 0.0185(7) Uani 1 1 d . . .
H52A H 0.6302 0.7677 0.3605 0.022 Uiso 1 1 calc R . .
H52B H 0.5088 0.7851 0.3356 0.022 Uiso 1 1 calc R . .
C16 C -0.0303(3) 1.2652(2) 0.98812(17) 0.0261(8) Uani 1 1 d . . .
H16A H -0.0637 1.2908 1.0243 0.031 Uiso 1 1 calc R . .
H16B H 0.0279 1.3113 0.9744 0.031 Uiso 1 1 calc R . .
C35 C 0.1304(3) 0.8981(2) 0.81158(18) 0.0245(7) Uani 1 1 d . . .
H35A H 0.0897 0.9097 0.8488 0.029 Uiso 1 1 calc R . .
H35B H 0.0786 0.8412 0.7844 0.029 Uiso 1 1 calc R . .
C88 C 0.0610(3) 0.4682(2) 0.25693(18) 0.0244(8) Uani 1 1 d . . .
H88A H 0.0536 0.5209 0.2506 0.029 Uiso 1 1 calc R . .
H88B H 0.0939 0.4784 0.3018 0.029 Uiso 1 1 calc R . .
C050 C 0.4333(3) 0.62278(18) 0.33845(14) 0.0120(6) Uani 1 1 d . . .
C23 C -0.0862(3) 0.7184(2) 0.48793(17) 0.0246(8) Uani 1 1 d . . .
H23 H -0.1328 0.7237 0.4501 0.030 Uiso 1 1 calc R . .
C55 C 0.5917(3) 0.8591(2) 0.42697(19) 0.0261(8) Uani 1 1 d . . .
H55 H 0.6474 0.9077 0.4138 0.031 Uiso 1 1 calc R . .
C48 C 0.6483(3) 0.49675(19) 0.22866(15) 0.0146(6) Uani 1 1 d . . .
H48A H 0.6937 0.4913 0.1925 0.018 Uiso 1 1 calc R . .
H48B H 0.6613 0.4584 0.2529 0.018 Uiso 1 1 calc R . .
C18 C 0.0212(3) 0.79277(18) 0.59978(15) 0.0130(6) Uani 1 1 d . . .
C85 C 0.0697(3) 0.3614(2) 0.16939(18) 0.0270(8) Uani 1 1 d . . .
H85A H 0.0936 0.3143 0.1771 0.032 Uiso 1 1 calc R . .
H85B H 0.0839 0.3660 0.1267 0.032 Uiso 1 1 calc R . .
C46 C 0.6380(3) 0.6024(2) 0.32776(15) 0.0159(6) Uani 1 1 d . . .
H46A H 0.6478 0.5651 0.3538 0.019 Uiso 1 1 calc R . .
H46B H 0.6792 0.6616 0.3538 0.019 Uiso 1 1 calc R . .
C81 C 0.0610(4) 0.6494(3) 0.1809(2) 0.0412(11) Uani 1 1 d . . .
H81 H 0.0323 0.6886 0.2072 0.049 Uiso 1 1 calc R . .
C79 C 0.2277(3) 0.5938(2) 0.15861(17) 0.0211(7) Uani 1 1 d . . .
C43 C 0.5440(3) 1.1571(3) 0.8099(3) 0.0491(14) Uani 1 1 d . . .
H43A H 0.5564 1.2026 0.7888 0.059 Uiso 1 1 calc R . .
H43B H 0.6077 1.1782 0.8484 0.059 Uiso 1 1 calc R . .
C5 C -0.1504(3) 0.8912(2) 0.66318(15) 0.0156(6) Uani 1 1 d . . .
H5A H -0.1903 0.8312 0.6385 0.019 Uiso 1 1 calc R . .
H5B H -0.1613 0.9265 0.6357 0.019 Uiso 1 1 calc R . .
C11 C -0.0850(3) 1.1706(2) 0.87812(16) 0.0202(7) Uani 1 1 d . . .
H11A H -0.0262 1.2161 0.8640 0.024 Uiso 1 1 calc R . .
H11B H -0.1542 1.1361 0.8427 0.024 Uiso 1 1 calc R . .
C58 C 0.6618(3) 0.8479(2) 0.48385(19) 0.0296(9) Uani 1 1 d . . .
H58A H 0.7372 0.8361 0.4725 0.036 Uiso 1 1 calc R . .
H58B H 0.6888 0.9006 0.5187 0.036 Uiso 1 1 calc R . .
C72 C 0.4223(3) 0.3913(2) 0.33108(17) 0.0191(7) Uani 1 1 d . . .
C59 C 0.4597(3) 0.7930(2) 0.52250(16) 0.0236(7) Uani 1 1 d . . .
H59A H 0.4050 0.7461 0.5369 0.028 Uiso 1 1 calc R . .
H59B H 0.4839 0.8457 0.5572 0.028 Uiso 1 1 calc R . .
C20 C -0.0491(3) 0.8009(2) 0.54085(15) 0.0183(7) Uani 1 1 d . . .
H20A H -0.1250 0.8130 0.5511 0.022 Uiso 1 1 calc R . .
H20B H 0.0051 0.8484 0.5268 0.022 Uiso 1 1 calc R . .
C56 C 0.5767(3) 0.7750(2) 0.50505(16) 0.0225(7) Uani 1 1 d . . .
H56 H 0.6227 0.7687 0.5426 0.027 Uiso 1 1 calc R . .
C36 C 0.2555(3) 0.8976(2) 0.83289(17) 0.0211(7) Uani 1 1 d . . .
C57 C 0.3895(3) 0.8022(2) 0.46468(16) 0.0196(7) Uani 1 1 d . . .
H57 H 0.3123 0.8132 0.4756 0.023 Uiso 1 1 calc R . .
C53 C 0.5384(3) 0.6927(2) 0.45137(15) 0.0175(6) Uani 1 1 d . . .
H53A H 0.4828 0.6452 0.4648 0.021 Uiso 1 1 calc R . .
H53B H 0.6138 0.6799 0.4411 0.021 Uiso 1 1 calc R . .
C24 C 0.1032(3) 0.6934(2) 0.52907(17) 0.0213(7) Uani 1 1 d . . .
H24 H 0.1805 0.6827 0.5181 0.026 Uiso 1 1 calc R . .
C25 C -0.1699(3) 0.6456(2) 0.5097(2) 0.0322(9) Uani 1 1 d . . .
H25A H -0.1960 0.5925 0.4752 0.039 Uiso 1 1 calc R . .
H25B H -0.2461 0.6568 0.5206 0.039 Uiso 1 1 calc R . .
C70 C 0.5118(3) 0.2228(2) 0.00673(17) 0.0245(8) Uani 1 1 d . . .
H70A H 0.5421 0.1961 -0.0303 0.029 Uiso 1 1 calc R . .
H70B H 0.4611 0.1777 0.0240 0.029 Uiso 1 1 calc R . .
C60 C 0.4739(3) 0.8765(2) 0.44432(19) 0.0269(8) Uani 1 1 d . . .
H60A H 0.4977 0.9291 0.4790 0.032 Uiso 1 1 calc R . .
H60B H 0.4285 0.8840 0.4076 0.032 Uiso 1 1 calc R . .
C8 C -0.0167(3) 1.11485(19) 0.89692(15) 0.0143(6) Uani 1 1 d . . .
C22 C -0.0991(3) 0.6357(2) 0.5674(2) 0.0281(8) Uani 1 1 d . . .
H22 H -0.1538 0.5872 0.5809 0.034 Uiso 1 1 calc R . .
C4 C -0.2168(3) 0.90736(18) 0.71959(15) 0.0142(6) Uani 1 1 d . . .
C14 C -0.1375(3) 1.2096(2) 0.93433(17) 0.0256(8) Uani 1 1 d . . .
H14 H -0.1830 1.2448 0.9213 0.031 Uiso 1 1 calc R . .
C29 C 0.0712(3) 1.1077(2) 0.66584(18) 0.0218(7) Uani 1 1 d . . .
C9 C 0.0908(3) 1.1722(3) 0.95107(16) 0.0259(8) Uani 1 1 d . . .
H9A H 0.1383 1.1386 0.9639 0.031 Uiso 1 1 calc R . .
H9B H 0.1486 1.2177 0.9366 0.031 Uiso 1 1 calc R . .
C67 C 0.6237(3) 0.2849(2) 0.05678(17) 0.0262(8) Uani 1 1 d . . .
H67 H 0.6766 0.2538 0.0695 0.031 Uiso 1 1 calc R . .
C63 C 0.5731(3) 0.4427(2) 0.06608(17) 0.0241(7) Uani 1 1 d . . .
H63A H 0.5201 0.4727 0.0528 0.029 Uiso 1 1 calc R . .
H63B H 0.6448 0.4845 0.0977 0.029 Uiso 1 1 calc R . .
C54 C 0.3525(3) 0.72067(19) 0.41060(15) 0.0159(6) Uani 1 1 d . . .
H54A H 0.3059 0.7267 0.3736 0.019 Uiso 1 1 calc R . .
H54B H 0.2970 0.6727 0.4237 0.019 Uiso 1 1 calc R . .
C49 C 0.8397(3) 0.6033(2) 0.29693(17) 0.0209(7) Uani 1 1 d . . .
H49A H 0.8846 0.5915 0.2620 0.031 Uiso 1 1 calc R . .
H49B H 0.8407 0.5657 0.3236 0.031 Uiso 1 1 calc R . .
H49C H 0.8807 0.6622 0.3219 0.031 Uiso 1 1 calc R . .
C6 C -0.2150(3) 0.8471(2) 0.75932(18) 0.0219(7) Uani 1 1 d . . .
H6A H -0.2508 0.7887 0.7327 0.033 Uiso 1 1 calc R . .
H6B H -0.2644 0.8550 0.7929 0.033 Uiso 1 1 calc R . .
H6C H -0.1285 0.8590 0.7779 0.033 Uiso 1 1 calc R . .
C64 C 0.3845(3) 0.3112(2) 0.04460(16) 0.0196(7) Uani 1 1 d . . .
H64A H 0.3331 0.2667 0.0623 0.023 Uiso 1 1 calc R . .
H64B H 0.3312 0.3411 0.0317 0.023 Uiso 1 1 calc R . .
C10 C -0.1068(4) 1.0451(2) 0.92080(19) 0.0293(8) Uani 1 1 d . . .
H10A H -0.1761 1.0072 0.8863 0.035 Uiso 1 1 calc R . .
H10B H -0.0616 1.0109 0.9346 0.035 Uiso 1 1 calc R . .
C17 C -0.2272(3) 1.1394(3) 0.9553(2) 0.0361(10) Uani 1 1 d . . .
H17A H -0.2964 1.1036 0.9202 0.043 Uiso 1 1 calc R . .
H17B H -0.2635 1.1639 0.9907 0.043 Uiso 1 1 calc R . .
C38 C 0.4520(4) 0.9571(3) 0.9063(2) 0.0428(11) Uani 1 1 d . . .
H38 H 0.5011 0.9962 0.9445 0.051 Uiso 1 1 calc R . .
C45 C 0.4266(3) 1.0257(2) 0.73712(17) 0.0222(7) Uani 1 1 d . . .
H45A H 0.4079 1.0318 0.6945 0.027 Uiso 1 1 calc R . .
H45B H 0.4169 0.9661 0.7336 0.027 Uiso 1 1 calc R . .
C50 C 0.7002(3) 0.6493(2) 0.23207(18) 0.0237(7) Uani 1 1 d . . .
H50A H 0.6136 0.6362 0.2130 0.036 Uiso 1 1 calc R . .
H50B H 0.7511 0.6437 0.1988 0.036 Uiso 1 1 calc R . .
H50C H 0.7336 0.7073 0.2595 0.036 Uiso 1 1 calc R . .
C34 C 0.0334(4) 1.0591(2) 0.60301(19) 0.0318(9) Uani 1 1 d . . .
H34 H 0.0831 1.0286 0.5849 0.038 Uiso 1 1 calc R . .
C69 C 0.5100(4) 0.3388(3) -0.04063(18) 0.0321(9) Uani 1 1 d . . .
H69A H 0.5406 0.3127 -0.0778 0.038 Uiso 1 1 calc R . .
H69B H 0.4578 0.3689 -0.0544 0.038 Uiso 1 1 calc R . .
C77 C 0.4998(3) 0.3483(2) 0.3060(2) 0.0264(8) Uani 1 1 d . . .
H77 H 0.4789 0.3153 0.2634 0.032 Uiso 1 1 calc R . .
C76 C 0.6076(4) 0.3536(3) 0.3435(2) 0.0388(11) Uani 1 1 d . . .
H76 H 0.6590 0.3240 0.3259 0.047 Uiso 1 1 calc R . .
C26 C 0.0202(4) 0.6196(2) 0.5505(2) 0.0314(9) Uani 1 1 d . . .
H26A H 0.0663 0.6137 0.5877 0.038 Uiso 1 1 calc R . .
H26B H -0.0025 0.5664 0.5165 0.038 Uiso 1 1 calc R . .
C31 C -0.1114(4) 1.1483(3) 0.6526(3) 0.0509(14) Uani 1 1 d . . .
H31 H -0.1613 1.1795 0.6695 0.061 Uiso 1 1 calc R . .
C84 C 0.1468(4) 0.5373(3) 0.10445(19) 0.0325(9) Uani 1 1 d . . .
H84 H 0.1745 0.4982 0.0773 0.039 Uiso 1 1 calc R . .
C73 C 0.4576(3) 0.4376(2) 0.39427(18) 0.0265(8) Uani 1 1 d . . .
H73 H 0.4064 0.4667 0.4128 0.032 Uiso 1 1 calc R . .
C37 C 0.3316(4) 0.9541(3) 0.88874(18) 0.0314(8) Uani 1 1 d . . .
H37 H 0.2999 0.9912 0.9152 0.038 Uiso 1 1 calc R . .
C68 C 0.7015(3) 0.3541(3) 0.0299(2) 0.0360(10) Uani 1 1 d . . .
H68A H 0.7349 0.3288 -0.0064 0.043 Uiso 1 1 calc R . .
H68B H 0.7732 0.3943 0.0623 0.043 Uiso 1 1 calc R . .
C30 C -0.0029(4) 1.1539(2) 0.6902(2) 0.0334(9) Uani 1 1 d . . .
H30 H 0.0203 1.1890 0.7323 0.040 Uiso 1 1 calc R . .
C83 C 0.0256(4) 0.5370(3) 0.0893(2) 0.0452(12) Uani 1 1 d . . .
H83 H -0.0272 0.4980 0.0520 0.054 Uiso 1 1 calc R . .
C82 C -0.0171(4) 0.5919(4) 0.1273(3) 0.0504(14) Uani 1 1 d . . .
H82 H -0.0998 0.5907 0.1171 0.060 Uiso 1 1 calc R . .
 
loop_
 _atom_site_aniso_label
 _atom_site_aniso_U_11
 _atom_site_aniso_U_22
 _atom_site_aniso_U_33
 _atom_site_aniso_U_23
 _atom_site_aniso_U_13
 _atom_site_aniso_U_12
Hf2 0.00763(6) 0.00806(7) 0.01229(7) 0.00016(5) 0.00314(4) 0.00268(5)
Hf1 0.00759(6) 0.00939(7) 0.01271(7) 0.00040(5) 0.00350(4) 0.00318(5)
O5 0.0089(10) 0.0202(11) 0.0163(12) -0.0037(9) 0.0015(8) 0.0033(9)
O4 0.0079(9) 0.0143(11) 0.0211(12) -0.0040(9) 0.0028(8) 0.0050(8)
O1 0.0106(10) 0.0252(12) 0.0156(12) -0.0044(9) 0.0034(8) 0.0064(9)
O3 0.0070(9) 0.0161(11) 0.0197(12) -0.0016(9) 0.0015(8) 0.0023(8)
O6 0.0065(9) 0.0155(11) 0.0213(12) -0.0005(9) 0.0018(8) 0.0013(8)
C39 0.0210(18) 0.058(3) 0.060(3) 0.043(3) 0.0062(19) 0.0135(19)
C32 0.033(2) 0.059(3) 0.067(4) 0.045(3) -0.007(2) 0.007(2)
N4 0.0080(11) 0.0122(12) 0.0145(13) -0.0017(10) 0.0022(9) 0.0037(10)
N3 0.0105(12) 0.0103(12) 0.0160(14) -0.0027(10) 0.0011(10) 0.0033(10)
O2 0.0100(10) 0.0149(11) 0.0197(12) -0.0023(9) 0.0041(8) 0.0039(9)
C75 0.025(2) 0.046(3) 0.053(3) 0.030(2) -0.0066(18) 0.0059(19)
C41 0.0258(18) 0.0247(18) 0.034(2) 0.0137(16) 0.0081(15) 0.0121(15)
C74 0.036(2) 0.036(2) 0.030(2) 0.0168(18) -0.0044(17) -0.0020(18)
C44 0.0129(17) 0.054(3) 0.070(4) -0.026(3) 0.0077(19) 0.0048(19)
C87 0.0183(19) 0.053(3) 0.067(4) -0.020(3) 0.013(2) -0.0026(19)
C86 0.0143(17) 0.047(3) 0.056(3) -0.010(2) 0.0056(17) -0.0057(17)
C71 0.0155(15) 0.0160(16) 0.0273(19) 0.0092(14) 0.0035(13) 0.0006(13)
N2 0.0069(11) 0.0116(12) 0.0152(13) -0.0015(10) 0.0008(9) 0.0008(9)
N1 0.0062(11) 0.0132(12) 0.0174(14) -0.0002(10) 0.0010(9) 0.0040(10)
C13 0.052(2) 0.033(2) 0.037(2) 0.0113(19) 0.036(2) 0.0159(19)
C40 0.032(2) 0.041(2) 0.057(3) 0.031(2) 0.023(2) 0.0237(19)
C33 0.042(2) 0.040(2) 0.042(3) 0.026(2) -0.006(2) 0.000(2)
C3 0.0069(13) 0.0115(14) 0.0239(17) 0.0002(12) 0.0050(12) 0.0021(11)
C027 0.0140(14) 0.0111(14) 0.0151(15) 0.0043(12) 0.0045(11) 0.0060(12)
C2 0.0110(13) 0.0123(14) 0.0116(15) 0.0016(11) 0.0043(11) 0.0049(11)
C15 0.069(3) 0.056(3) 0.022(2) 0.0163(19) 0.025(2) 0.044(3)
C7 0.0103(14) 0.0172(16) 0.0249(18) -0.0027(13) 0.0025(12) 0.0033(12)
C65 0.0196(15) 0.0292(18) 0.0141(16) -0.0037(14) -0.0001(12) 0.0119(14)
C80 0.0314(19) 0.0293(19) 0.038(2) 0.0178(17) 0.0148(17) 0.0176(16)
C61 0.0128(13) 0.0145(14) 0.0128(15) 0.0002(12) 0.0028(11) 0.0077(12)
C12 0.0283(18) 0.049(2) 0.0126(17) -0.0021(16) 0.0016(14) 0.0244(18)
C78 0.0225(17) 0.0263(18) 0.030(2) 0.0175(15) 0.0103(14) 0.0123(14)
C42 0.0150(15) 0.0258(18) 0.0257(19) -0.0092(15) 0.0005(13) 0.0034(14)
C1 0.0128(14) 0.0130(14) 0.0172(16) 0.0035(12) 0.0065(12) 0.0071(12)
C28 0.0185(16) 0.0185(17) 0.035(2) 0.0130(15) 0.0059(14) 0.0040(13)
C62 0.0250(16) 0.0177(16) 0.0174(17) -0.0023(13) -0.0011(13) 0.0141(14)
C27 0.0240(17) 0.0262(18) 0.0186(18) -0.0082(14) 0.0050(14) 0.0089(15)
C19 0.0198(15) 0.0144(15) 0.0277(19) 0.0057(14) 0.0104(13) 0.0067(13)
C66 0.040(2) 0.0235(19) 0.032(2) 0.0070(16) 0.0239(17) 0.0067(16)
C21 0.0139(14) 0.0174(16) 0.0199(17) -0.0030(13) 0.0044(12) 0.0091(12)
C51 0.0119(13) 0.0111(14) 0.0120(15) -0.0024(11) 0.0035(11) 0.0033(11)
C47 0.0068(13) 0.0106(14) 0.0209(16) 0.0009(12) 0.0043(11) 0.0016(11)
C52 0.0214(15) 0.0118(15) 0.0225(18) 0.0045(13) 0.0083(13) 0.0052(13)
C16 0.0279(18) 0.0260(18) 0.0205(18) -0.0055(14) 0.0018(14) 0.0133(15)
C35 0.0242(17) 0.0286(19) 0.0279(19) 0.0153(15) 0.0085(14) 0.0125(15)
C88 0.0117(15) 0.0232(17) 0.034(2) -0.0016(15) 0.0108(14) 0.0062(13)
C050 0.0108(13) 0.0103(14) 0.0129(15) 0.0022(12) 0.0031(11) 0.0017(11)
C23 0.0221(16) 0.0296(19) 0.0167(17) -0.0059(14) 0.0007(13) 0.0114(15)
C55 0.0273(18) 0.0093(15) 0.036(2) 0.0010(14) 0.0129(15) 0.0018(13)
C48 0.0063(13) 0.0119(14) 0.0211(17) -0.0012(12) 0.0020(11) 0.0014(11)
C18 0.0109(13) 0.0122(14) 0.0146(15) -0.0001(12) 0.0049(11) 0.0044(11)
C85 0.0172(16) 0.0236(18) 0.027(2) -0.0087(15) -0.0003(14) 0.0016(14)
C46 0.0088(13) 0.0156(15) 0.0203(17) -0.0019(12) 0.0031(11) 0.0050(12)
C81 0.039(2) 0.048(3) 0.066(3) 0.041(2) 0.029(2) 0.031(2)
C79 0.0239(16) 0.0220(17) 0.0246(18) 0.0157(14) 0.0101(14) 0.0094(14)
C43 0.0180(18) 0.037(2) 0.065(3) -0.019(2) 0.0156(19) -0.0053(17)
C5 0.0108(14) 0.0168(15) 0.0176(16) -0.0009(12) 0.0038(11) 0.0065(12)
C11 0.0255(17) 0.0172(16) 0.0174(17) -0.0017(13) -0.0022(13) 0.0128(14)
C58 0.0179(16) 0.0215(18) 0.033(2) -0.0118(15) 0.0004(14) 0.0004(14)
C72 0.0167(15) 0.0120(15) 0.0272(19) 0.0117(13) 0.0031(13) -0.0011(12)
C59 0.0250(17) 0.0257(18) 0.0161(17) -0.0043(14) 0.0049(13) 0.0104(14)
C20 0.0168(15) 0.0187(16) 0.0185(17) 0.0011(13) 0.0018(12) 0.0082(13)
C56 0.0200(16) 0.0252(18) 0.0171(17) -0.0053(14) -0.0041(13) 0.0107(14)
C36 0.0233(16) 0.0229(17) 0.0254(18) 0.0157(14) 0.0107(14) 0.0111(14)
C57 0.0169(15) 0.0185(16) 0.0229(18) -0.0028(13) 0.0087(13) 0.0105(13)
C53 0.0173(15) 0.0208(16) 0.0158(16) 0.0016(13) 0.0023(12) 0.0109(13)
C24 0.0179(15) 0.0199(16) 0.0239(18) -0.0054(14) 0.0065(13) 0.0112(13)
C25 0.0178(16) 0.0227(18) 0.040(2) -0.0139(16) 0.0046(15) 0.0016(14)
C70 0.0291(18) 0.0194(17) 0.0202(18) -0.0074(14) -0.0003(14) 0.0126(15)
C60 0.0314(19) 0.0138(16) 0.036(2) -0.0004(14) 0.0092(16) 0.0131(15)
C8 0.0147(14) 0.0168(15) 0.0146(15) 0.0017(12) 0.0059(12) 0.0108(12)
C22 0.0273(18) 0.0102(15) 0.043(2) 0.0018(15) 0.0165(16) 0.0033(14)
C4 0.0076(13) 0.0098(14) 0.0230(17) 0.0013(12) 0.0032(11) 0.0023(11)
C14 0.0269(18) 0.0268(18) 0.0235(19) -0.0059(14) -0.0018(14) 0.0203(15)
C29 0.0213(16) 0.0151(16) 0.033(2) 0.0175(14) 0.0063(14) 0.0029(13)
C9 0.0203(16) 0.042(2) 0.0157(17) -0.0025(15) 0.0022(13) 0.0184(16)
C67 0.0244(17) 0.0266(18) 0.0251(19) -0.0092(15) -0.0037(14) 0.0188(15)
C63 0.0322(18) 0.0191(17) 0.0255(19) 0.0075(14) 0.0167(15) 0.0115(15)
C54 0.0113(13) 0.0174(15) 0.0177(16) -0.0014(13) 0.0033(12) 0.0077(12)
C49 0.0103(14) 0.0202(16) 0.0250(18) -0.0035(14) 0.0015(12) 0.0029(13)
C6 0.0172(15) 0.0151(16) 0.034(2) 0.0086(14) 0.0088(14) 0.0037(13)
C64 0.0155(15) 0.0243(17) 0.0166(17) -0.0006(13) 0.0026(12) 0.0084(13)
C10 0.047(2) 0.0204(17) 0.029(2) 0.0102(15) 0.0256(17) 0.0160(16)
C17 0.0210(17) 0.040(2) 0.039(2) -0.0091(18) 0.0143(16) 0.0116(16)
C38 0.034(2) 0.054(3) 0.034(2) 0.025(2) -0.0027(18) 0.000(2)
C45 0.0138(15) 0.0217(17) 0.0268(19) -0.0021(14) 0.0089(13) 0.0056(13)
C50 0.0200(16) 0.0158(16) 0.034(2) 0.0088(15) 0.0097(14) 0.0021(13)
C34 0.035(2) 0.029(2) 0.031(2) 0.0163(17) 0.0046(16) 0.0047(17)
C69 0.049(2) 0.039(2) 0.0183(19) 0.0090(16) 0.0157(17) 0.0263(19)
C77 0.0253(18) 0.0162(16) 0.037(2) 0.0084(15) 0.0052(15) 0.0053(14)
C76 0.0240(19) 0.034(2) 0.072(3) 0.029(2) 0.010(2) 0.0167(17)
C26 0.035(2) 0.0148(17) 0.045(2) 0.0001(16) 0.0124(18) 0.0140(15)
C31 0.039(2) 0.049(3) 0.094(4) 0.051(3) 0.027(3) 0.028(2)
C84 0.0306(19) 0.041(2) 0.026(2) 0.0158(18) 0.0097(16) 0.0074(17)
C73 0.0294(18) 0.0253(19) 0.0249(19) 0.0124(15) 0.0073(15) 0.0055(15)
C37 0.037(2) 0.037(2) 0.022(2) 0.0147(17) 0.0093(16) 0.0102(17)
C68 0.0198(17) 0.039(2) 0.037(2) -0.0120(18) 0.0148(16) 0.0077(16)
C30 0.032(2) 0.0214(18) 0.052(3) 0.0164(18) 0.0106(18) 0.0109(16)
C83 0.028(2) 0.071(3) 0.033(2) 0.033(2) -0.0003(17) 0.001(2)
C82 0.024(2) 0.079(4) 0.074(4) 0.058(3) 0.016(2) 0.024(2)
 
_geom_special_details
;
 All esds (except the esd in the dihedral angle between two l.s. planes)
 are estimated using the full covariance matrix.  The cell esds are taken
 into account individually in the estimation of esds in distances, angles
 and torsion angles; correlations between esds in cell parameters are only
 used when they are defined by crystal symmetry.  An approximate (isotropic)
 treatment of cell esds is used for estimating esds involving l.s. planes.
;
 
loop_
 _geom_bond_atom_site_label_1
 _geom_bond_atom_site_label_2
 _geom_bond_distance
 _geom_bond_site_symmetry_2
 _geom_bond_publ_flag
Hf2 N4 2.171(2) . ?
Hf2 N3 2.172(2) . ?
Hf2 O4 2.180(2) . ?
Hf2 O5 2.189(2) . ?
Hf2 O6 2.252(2) . ?
Hf2 C71 2.336(3) . ?
Hf2 C78 2.357(3) . ?
Hf2 C050 2.605(3) . ?
Hf2 C027 2.609(3) . ?
Hf1 N1 2.166(2) . ?
Hf1 N2 2.174(2) . ?
Hf1 O2 2.181(2) . ?
Hf1 O1 2.193(2) . ?
Hf1 O3 2.256(2) . ?
Hf1 C28 2.341(4) . ?
Hf1 C35 2.357(4) . ?
Hf1 C2 2.605(3) . ?
Hf1 C1 2.618(3) . ?
O5 C027 1.303(4) . ?
O4 C050 1.316(4) . ?
O1 C1 1.313(4) . ?
O3 C42 1.464(4) . ?
O3 C45 1.465(4) . ?
O6 C88 1.456(4) . ?
O6 C85 1.463(4) . ?
C39 C38 1.375(7) . ?
C39 C40 1.377(7) . ?
C32 C33 1.368(8) . ?
C32 C31 1.388(8) . ?
N4 C027 1.312(4) . ?
N4 C48 1.470(3) . ?
N3 C050 1.306(4) . ?
N3 C46 1.458(4) . ?
O2 C2 1.307(4) . ?
C75 C74 1.374(7) . ?
C75 C76 1.376(7) . ?
C41 C40 1.394(5) . ?
C41 C36 1.408(5) . ?
C74 C73 1.384(5) . ?
C44 C43 1.441(6) . ?
C44 C45 1.488(5) . ?
C87 C86 1.448(6) . ?
C87 C88 1.500(5) . ?
C86 C85 1.488(5) . ?
C71 C72 1.477(4) . ?
N2 C2 1.318(4) . ?
N2 C5 1.457(4) . ?
N1 C1 1.313(4) . ?
N1 C3 1.467(4) . ?
C13 C17 1.520(6) . ?
C13 C10 1.530(5) . ?
C13 C15 1.538(7) . ?
C33 C34 1.378(6) . ?
C3 C4 1.527(4) . ?
C027 C61 1.521(4) . ?
C2 C18 1.520(4) . ?
C15 C12 1.519(6) . ?
C7 C4 1.539(4) . ?
C65 C70 1.524(5) . ?
C65 C69 1.526(6) . ?
C65 C64 1.535(5) . ?
C80 C81 1.387(6) . ?
C80 C79 1.409(5) . ?
C61 C63 1.541(5) . ?
C61 C62 1.544(4) . ?
C61 C64 1.552(4) . ?
C12 C16 1.527(5) . ?
C12 C9 1.537(5) . ?
C78 C79 1.473(5) . ?
C42 C43 1.483(5) . ?
C1 C8 1.511(4) . ?
C28 C29 1.471(5) . ?
C62 C67 1.541(5) . ?
C27 C23 1.528(5) . ?
C27 C24 1.536(5) . ?
C19 C22 1.537(5) . ?
C19 C18 1.552(4) . ?
C66 C69 1.525(6) . ?
C66 C68 1.536(6) . ?
C66 C63 1.538(5) . ?
C21 C24 1.532(4) . ?
C21 C18 1.544(4) . ?
C51 C050 1.520(4) . ?
C51 C54 1.540(4) . ?
C51 C53 1.541(4) . ?
C51 C52 1.543(4) . ?
C47 C50 1.526(5) . ?
C47 C49 1.534(4) . ?
C47 C46 1.534(4) . ?
C47 C48 1.536(4) . ?
C52 C55 1.533(4) . ?
C16 C14 1.527(5) . ?
C35 C36 1.480(5) . ?
C23 C25 1.524(6) . ?
C23 C20 1.535(4) . ?
C55 C58 1.529(6) . ?
C55 C60 1.535(5) . ?
C18 C20 1.543(4) . ?
C81 C82 1.382(7) . ?
C79 C84 1.397(5) . ?
C5 C4 1.530(4) . ?
C11 C14 1.536(5) . ?
C11 C8 1.539(4) . ?
C58 C56 1.525(5) . ?
C72 C73 1.396(5) . ?
C72 C77 1.404(5) . ?
C59 C57 1.531(5) . ?
C59 C56 1.531(5) . ?
C56 C53 1.541(4) . ?
C36 C37 1.402(5) . ?
C57 C60 1.529(5) . ?
C57 C54 1.537(4) . ?
C24 C26 1.531(5) . ?
C25 C22 1.537(6) . ?
C70 C67 1.537(5) . ?
C8 C9 1.539(4) . ?
C8 C10 1.545(5) . ?
C22 C26 1.539(5) . ?
C4 C6 1.524(5) . ?
C14 C17 1.511(6) . ?
C29 C34 1.400(6) . ?
C29 C30 1.404(5) . ?
C67 C68 1.523(6) . ?
C38 C37 1.387(6) . ?
C77 C76 1.401(5) . ?
C31 C30 1.408(6) . ?
C84 C83 1.404(6) . ?
C83 C82 1.363(8) . ?
 
loop_
 _geom_angle_atom_site_label_1
 _geom_angle_atom_site_label_2
 _geom_angle_atom_site_label_3
 _geom_angle
 _geom_angle_site_symmetry_1
 _geom_angle_site_symmetry_3
 _geom_angle_publ_flag
N4 Hf2 N3 78.32(9) . . ?
N4 Hf2 O4 138.39(8) . . ?
N3 Hf2 O4 60.28(8) . . ?
N4 Hf2 O5 59.98(8) . . ?
N3 Hf2 O5 138.15(9) . . ?
O4 Hf2 O5 160.29(8) . . ?
N4 Hf2 O6 140.04(8) . . ?
N3 Hf2 O6 140.62(9) . . ?
O4 Hf2 O6 81.48(8) . . ?
O5 Hf2 O6 81.09(8) . . ?
N4 Hf2 C71 92.89(11) . . ?
N3 Hf2 C71 93.17(11) . . ?
O4 Hf2 C71 93.33(11) . . ?
O5 Hf2 C71 92.35(11) . . ?
O6 Hf2 C71 79.15(10) . . ?
N4 Hf2 C78 95.51(11) . . ?
N3 Hf2 C78 95.18(12) . . ?
O4 Hf2 C78 84.89(11) . . ?
O5 Hf2 C78 86.00(11) . . ?
O6 Hf2 C78 90.04(10) . . ?
C71 Hf2 C78 169.20(12) . . ?
N4 Hf2 C050 108.13(9) . . ?
N3 Hf2 C050 30.03(9) . . ?
O4 Hf2 C050 30.30(8) . . ?
O5 Hf2 C050 166.37(9) . . ?
O6 Hf2 C050 111.54(8) . . ?
C71 Hf2 C050 95.06(11) . . ?
C78 Hf2 C050 88.79(12) . . ?
N4 Hf2 C027 30.13(9) . . ?
N3 Hf2 C027 108.28(9) . . ?
O4 Hf2 C027 166.63(9) . . ?
O5 Hf2 C027 29.90(8) . . ?
O6 Hf2 C027 110.77(9) . . ?
C71 Hf2 C027 94.27(11) . . ?
C78 Hf2 C027 89.62(11) . . ?
C050 Hf2 C027 137.66(9) . . ?
N1 Hf1 N2 78.13(9) . . ?
N1 Hf1 O2 138.32(9) . . ?
N2 Hf1 O2 60.28(9) . . ?
N1 Hf1 O1 60.00(8) . . ?
N2 Hf1 O1 137.78(9) . . ?
O2 Hf1 O1 160.35(8) . . ?
N1 Hf1 O3 140.34(9) . . ?
N2 Hf1 O3 140.48(9) . . ?
O2 Hf1 O3 81.14(8) . . ?
O1 Hf1 O3 81.68(8) . . ?
N1 Hf1 C28 92.62(11) . . ?
N2 Hf1 C28 94.17(11) . . ?
O2 Hf1 C28 92.98(12) . . ?
O1 Hf1 C28 92.91(12) . . ?
O3 Hf1 C28 78.59(10) . . ?
N1 Hf1 C35 96.57(11) . . ?
N2 Hf1 C35 94.13(12) . . ?
O2 Hf1 C35 84.51(11) . . ?
O1 Hf1 C35 86.07(12) . . ?
O3 Hf1 C35 90.14(10) . . ?
C28 Hf1 C35 168.71(12) . . ?
N1 Hf1 C2 108.26(9) . . ?
N2 Hf1 C2 30.33(9) . . ?
O2 Hf1 C2 30.06(8) . . ?
O1 Hf1 C2 165.64(9) . . ?
O3 Hf1 C2 111.08(8) . . ?
C28 Hf1 C2 96.04(12) . . ?
C35 Hf1 C2 87.30(12) . . ?
N1 Hf1 C1 30.00(9) . . ?
N2 Hf1 C1 107.84(9) . . ?
O2 Hf1 C1 166.47(9) . . ?
O1 Hf1 C1 30.05(9) . . ?
O3 Hf1 C1 111.42(9) . . ?
C28 Hf1 C1 94.46(12) . . ?
C35 Hf1 C1 90.28(12) . . ?
C2 Hf1 C1 137.43(9) . . ?
C027 O5 Hf2 93.19(17) . . ?
C050 O4 Hf2 93.01(17) . . ?
C1 O1 Hf1 93.20(17) . . ?
C42 O3 C45 109.8(2) . . ?
C42 O3 Hf1 124.32(18) . . ?
C45 O3 Hf1 124.30(18) . . ?
C88 O6 C85 109.6(2) . . ?
C88 O6 Hf2 124.56(18) . . ?
C85 O6 Hf2 124.56(18) . . ?
C38 C39 C40 118.9(4) . . ?
C33 C32 C31 119.5(4) . . ?
C027 N4 C48 129.1(3) . . ?
C027 N4 Hf2 93.72(18) . . ?
C48 N4 Hf2 137.2(2) . . ?
C050 N3 C46 129.9(3) . . ?
C050 N3 Hf2 93.66(18) . . ?
C46 N3 Hf2 136.38(19) . . ?
C2 O2 Hf1 93.22(17) . . ?
C74 C75 C76 119.3(4) . . ?
C40 C41 C36 121.5(4) . . ?
C75 C74 C73 120.3(4) . . ?
C43 C44 C45 107.4(3) . . ?
C86 C87 C88 107.0(4) . . ?
C87 C86 C85 106.5(3) . . ?
C72 C71 Hf2 116.5(2) . . ?
C2 N2 C5 129.4(3) . . ?
C2 N2 Hf1 93.25(17) . . ?
C5 N2 Hf1 137.33(19) . . ?
C1 N1 C3 129.3(3) . . ?
C1 N1 Hf1 94.41(18) . . ?
C3 N1 Hf1 136.3(2) . . ?
C17 C13 C10 109.9(4) . . ?
C17 C13 C15 109.1(3) . . ?
C10 C13 C15 109.2(3) . . ?
C39 C40 C41 120.7(4) . . ?
C32 C33 C34 120.1(5) . . ?
N1 C3 C4 113.2(2) . . ?
O5 C027 N4 112.9(3) . . ?
O5 C027 C61 118.8(3) . . ?
N4 C027 C61 128.2(3) . . ?
O5 C027 Hf2 56.91(15) . . ?
N4 C027 Hf2 56.15(16) . . ?
C61 C027 Hf2 173.0(2) . . ?
O2 C2 N2 112.9(3) . . ?
O2 C2 C18 118.1(2) . . ?
N2 C2 C18 129.0(3) . . ?
O2 C2 Hf1 56.72(14) . . ?
N2 C2 Hf1 56.42(15) . . ?
C18 C2 Hf1 170.9(2) . . ?
C12 C15 C13 109.8(3) . . ?
C70 C65 C69 109.6(3) . . ?
C70 C65 C64 109.7(3) . . ?
C69 C65 C64 109.6(3) . . ?
C81 C80 C79 121.8(4) . . ?
C027 C61 C63 108.7(2) . . ?
C027 C61 C62 111.7(3) . . ?
C63 C61 C62 111.4(3) . . ?
C027 C61 C64 110.0(2) . . ?
C63 C61 C64 107.8(3) . . ?
C62 C61 C64 107.2(2) . . ?
C15 C12 C16 108.7(3) . . ?
C15 C12 C9 110.2(3) . . ?
C16 C12 C9 109.2(3) . . ?
C79 C78 Hf2 115.1(2) . . ?
O3 C42 C43 105.6(3) . . ?
N1 C1 O1 112.2(3) . . ?
N1 C1 C8 128.7(3) . . ?
O1 C1 C8 119.1(3) . . ?
N1 C1 Hf1 55.59(15) . . ?
O1 C1 Hf1 56.76(14) . . ?
C8 C1 Hf1 173.5(2) . . ?
C29 C28 Hf1 115.1(2) . . ?
C67 C62 C61 109.5(3) . . ?
C23 C27 C24 109.2(3) . . ?
C22 C19 C18 109.5(3) . . ?
C69 C66 C68 109.4(3) . . ?
C69 C66 C63 109.6(3) . . ?
C68 C66 C63 109.2(3) . . ?
C24 C21 C18 109.9(2) . . ?
C050 C51 C54 110.2(2) . . ?
C050 C51 C53 110.9(2) . . ?
C54 C51 C53 107.8(3) . . ?
C050 C51 C52 109.4(3) . . ?
C54 C51 C52 108.3(2) . . ?
C53 C51 C52 110.2(3) . . ?
C50 C47 C49 110.3(3) . . ?
C50 C47 C46 110.8(3) . . ?
C49 C47 C46 106.5(3) . . ?
C50 C47 C48 109.9(3) . . ?
C49 C47 C48 106.8(2) . . ?
C46 C47 C48 112.5(3) . . ?
C55 C52 C51 109.9(3) . . ?
C14 C16 C12 109.3(3) . . ?
C36 C35 Hf1 114.2(2) . . ?
O6 C88 C87 105.4(3) . . ?
N3 C050 O4 112.9(3) . . ?
N3 C050 C51 128.9(3) . . ?
O4 C050 C51 118.1(2) . . ?
N3 C050 Hf2 56.31(15) . . ?
O4 C050 Hf2 56.70(14) . . ?
C51 C050 Hf2 172.1(2) . . ?
C25 C23 C27 109.6(3) . . ?
C25 C23 C20 109.5(3) . . ?
C27 C23 C20 109.9(3) . . ?
C58 C55 C52 109.3(3) . . ?
C58 C55 C60 109.7(3) . . ?
C52 C55 C60 109.5(3) . . ?
N4 C48 C47 113.1(2) . . ?
C2 C18 C20 110.9(2) . . ?
C2 C18 C21 110.4(2) . . ?
C20 C18 C21 108.2(3) . . ?
C2 C18 C19 108.7(3) . . ?
C20 C18 C19 110.0(3) . . ?
C21 C18 C19 108.6(3) . . ?
O6 C85 C86 106.0(3) . . ?
N3 C46 C47 113.3(3) . . ?
C82 C81 C80 120.5(4) . . ?
C84 C79 C80 116.3(3) . . ?
C84 C79 C78 122.4(3) . . ?
C80 C79 C78 121.2(3) . . ?
C44 C43 C42 106.9(3) . . ?
N2 C5 C4 113.2(3) . . ?
C14 C11 C8 110.1(3) . . ?
C56 C58 C55 109.8(3) . . ?
C73 C72 C77 116.8(3) . . ?
C73 C72 C71 121.4(3) . . ?
C77 C72 C71 121.7(3) . . ?
C57 C59 C56 108.9(3) . . ?
C23 C20 C18 109.7(3) . . ?
C58 C56 C59 109.9(3) . . ?
C58 C56 C53 109.4(3) . . ?
C59 C56 C53 109.7(3) . . ?
C37 C36 C41 116.2(3) . . ?
C37 C36 C35 122.0(3) . . ?
C41 C36 C35 121.7(3) . . ?
C60 C57 C59 109.2(3) . . ?
C60 C57 C54 109.7(3) . . ?
C59 C57 C54 110.0(3) . . ?
C56 C53 C51 109.7(3) . . ?
C26 C24 C21 109.6(3) . . ?
C26 C24 C27 109.1(3) . . ?
C21 C24 C27 110.1(3) . . ?
C23 C25 C22 109.9(3) . . ?
C65 C70 C67 109.3(3) . . ?
C57 C60 C55 109.2(3) . . ?
C1 C8 C11 111.1(3) . . ?
C1 C8 C9 110.5(2) . . ?
C11 C8 C9 107.2(3) . . ?
C1 C8 C10 109.3(3) . . ?
C11 C8 C10 110.0(3) . . ?
C9 C8 C10 108.7(3) . . ?
C19 C22 C25 109.3(3) . . ?
C19 C22 C26 109.1(3) . . ?
C25 C22 C26 109.6(3) . . ?
C6 C4 C3 110.2(3) . . ?
C6 C4 C5 110.8(3) . . ?
C3 C4 C5 112.2(3) . . ?
C6 C4 C7 109.9(3) . . ?
C3 C4 C7 107.2(2) . . ?
C5 C4 C7 106.5(3) . . ?
C17 C14 C16 110.1(3) . . ?
C17 C14 C11 109.0(3) . . ?
C16 C14 C11 109.6(3) . . ?
C34 C29 C30 116.8(3) . . ?
C34 C29 C28 120.8(3) . . ?
C30 C29 C28 122.3(4) . . ?
C12 C9 C8 110.5(3) . . ?
C68 C67 C70 109.6(3) . . ?
C68 C67 C62 110.0(3) . . ?
C70 C67 C62 108.9(3) . . ?
C66 C63 C61 109.7(3) . . ?
C57 C54 C51 110.3(2) . . ?
C65 C64 C61 110.2(3) . . ?
C13 C10 C8 109.6(3) . . ?
C14 C17 C13 110.3(3) . . ?
C39 C38 C37 121.0(4) . . ?
O3 C45 C44 104.7(3) . . ?
C33 C34 C29 122.7(4) . . ?
C66 C69 C65 109.6(3) . . ?
C76 C77 C72 120.5(4) . . ?
C75 C76 C77 120.9(4) . . ?
C24 C26 C22 109.5(3) . . ?
C32 C31 C30 120.6(5) . . ?
C79 C84 C83 121.4(4) . . ?
C74 C73 C72 122.2(4) . . ?
C38 C37 C36 121.7(4) . . ?
C67 C68 C66 110.1(3) . . ?
C29 C30 C31 120.2(4) . . ?
C82 C83 C84 120.8(4) . . ?
C83 C82 C81 119.3(4) . . ?
 
loop_
 _geom_torsion_atom_site_label_1
 _geom_torsion_atom_site_label_2
 _geom_torsion_atom_site_label_3
 _geom_torsion_atom_site_label_4
 _geom_torsion
 _geom_torsion_site_symmetry_1
 _geom_torsion_site_symmetry_2
 _geom_torsion_site_symmetry_3
 _geom_torsion_site_symmetry_4
 _geom_torsion_publ_flag
N4 Hf2 O5 C027 -2.50(17) . . . . ?
N3 Hf2 O5 C027 2.9(3) . . . . ?
O4 Hf2 O5 C027 158.8(2) . . . . ?
O6 Hf2 O5 C027 -173.11(19) . . . . ?
C71 Hf2 O5 C027 -94.48(19) . . . . ?
C78 Hf2 O5 C027 96.22(19) . . . . ?
C050 Hf2 O5 C027 28.5(5) . . . . ?
N4 Hf2 O4 C050 -3.8(2) . . . . ?
N3 Hf2 O4 C050 2.57(17) . . . . ?
O5 Hf2 O4 C050 -159.2(2) . . . . ?
O6 Hf2 O4 C050 172.82(19) . . . . ?
C71 Hf2 O4 C050 94.32(19) . . . . ?
C78 Hf2 O4 C050 -96.37(19) . . . . ?
C027 Hf2 O4 C050 -30.3(5) . . . . ?
N1 Hf1 O1 C1 2.52(18) . . . . ?
N2 Hf1 O1 C1 -5.6(3) . . . . ?
O2 Hf1 O1 C1 -158.8(2) . . . . ?
O3 Hf1 O1 C1 171.9(2) . . . . ?
C28 Hf1 O1 C1 93.9(2) . . . . ?
C35 Hf1 O1 C1 -97.4(2) . . . . ?
C2 Hf1 O1 C1 -34.7(5) . . . . ?
N1 Hf1 O3 C42 -2.6(3) . . . . ?
N2 Hf1 O3 C42 160.3(3) . . . . ?
O2 Hf1 O3 C42 172.5(3) . . . . ?
O1 Hf1 O3 C42 -17.1(3) . . . . ?
C28 Hf1 O3 C42 77.6(3) . . . . ?
C35 Hf1 O3 C42 -103.1(3) . . . . ?
C2 Hf1 O3 C42 169.8(3) . . . . ?
C1 Hf1 O3 C42 -12.7(3) . . . . ?
N1 Hf1 O3 C45 -166.6(2) . . . . ?
N2 Hf1 O3 C45 -3.7(3) . . . . ?
O2 Hf1 O3 C45 8.5(2) . . . . ?
O1 Hf1 O3 C45 178.9(3) . . . . ?
C28 Hf1 O3 C45 -86.4(3) . . . . ?
C35 Hf1 O3 C45 92.9(3) . . . . ?
C2 Hf1 O3 C45 5.8(3) . . . . ?
C1 Hf1 O3 C45 -176.7(2) . . . . ?
N4 Hf2 O6 C88 168.5(2) . . . . ?
N3 Hf2 O6 C88 5.4(3) . . . . ?
O4 Hf2 O6 C88 -8.0(2) . . . . ?
O5 Hf2 O6 C88 -178.8(3) . . . . ?
C71 Hf2 O6 C88 87.0(3) . . . . ?
C78 Hf2 O6 C88 -92.9(3) . . . . ?
C050 Hf2 O6 C88 -4.2(3) . . . . ?
C027 Hf2 O6 C88 177.5(2) . . . . ?
N4 Hf2 O6 C85 2.6(3) . . . . ?
N3 Hf2 O6 C85 -160.6(3) . . . . ?
O4 Hf2 O6 C85 -174.0(3) . . . . ?
O5 Hf2 O6 C85 15.3(3) . . . . ?
C71 Hf2 O6 C85 -78.9(3) . . . . ?
C78 Hf2 O6 C85 101.2(3) . . . . ?
C050 Hf2 O6 C85 -170.1(3) . . . . ?
C027 Hf2 O6 C85 11.6(3) . . . . ?
N3 Hf2 N4 C027 -173.8(2) . . . . ?
O4 Hf2 N4 C027 -168.16(17) . . . . ?
O5 Hf2 N4 C027 2.48(17) . . . . ?
O6 Hf2 N4 C027 17.0(3) . . . . ?
C71 Hf2 N4 C027 93.54(19) . . . . ?
C78 Hf2 N4 C027 -79.7(2) . . . . ?
C050 Hf2 N4 C027 -170.19(18) . . . . ?
N3 Hf2 N4 C48 6.9(3) . . . . ?
O4 Hf2 N4 C48 12.6(4) . . . . ?
O5 Hf2 N4 C48 -176.8(3) . . . . ?
O6 Hf2 N4 C48 -162.3(3) . . . . ?
C71 Hf2 N4 C48 -85.7(3) . . . . ?
C78 Hf2 N4 C48 101.1(3) . . . . ?
C050 Hf2 N4 C48 10.5(3) . . . . ?
C027 Hf2 N4 C48 -179.3(4) . . . . ?
N4 Hf2 N3 C050 173.1(2) . . . . ?
O4 Hf2 N3 C050 -2.60(17) . . . . ?
O5 Hf2 N3 C050 168.29(17) . . . . ?
O6 Hf2 N3 C050 -17.9(3) . . . . ?
C71 Hf2 N3 C050 -94.6(2) . . . . ?
C78 Hf2 N3 C050 78.5(2) . . . . ?
C027 Hf2 N3 C050 169.82(18) . . . . ?
N4 Hf2 N3 C46 -9.1(3) . . . . ?
O4 Hf2 N3 C46 175.2(3) . . . . ?
O5 Hf2 N3 C46 -13.9(4) . . . . ?
O6 Hf2 N3 C46 159.9(3) . . . . ?
C71 Hf2 N3 C46 83.2(3) . . . . ?
C78 Hf2 N3 C46 -103.7(3) . . . . ?
C050 Hf2 N3 C46 177.8(4) . . . . ?
C027 Hf2 N3 C46 -12.4(3) . . . . ?
N1 Hf1 O2 C2 0.4(2) . . . . ?
N2 Hf1 O2 C2 -3.82(17) . . . . ?
O1 Hf1 O2 C2 155.8(2) . . . . ?
O3 Hf1 O2 C2 -174.88(19) . . . . ?
C28 Hf1 O2 C2 -96.92(19) . . . . ?
C35 Hf1 O2 C2 94.12(19) . . . . ?
C1 Hf1 O2 C2 26.4(5) . . . . ?
C76 C75 C74 C73 -0.4(6) . . . . ?
C88 C87 C86 C85 24.0(6) . . . . ?
N4 Hf2 C71 C72 46.5(3) . . . . ?
N3 Hf2 C71 C72 -31.9(3) . . . . ?
O4 Hf2 C71 C72 -92.3(3) . . . . ?
O5 Hf2 C71 C72 106.6(3) . . . . ?
O6 Hf2 C71 C72 -173.0(3) . . . . ?
C78 Hf2 C71 C72 -172.5(6) . . . . ?
C050 Hf2 C71 C72 -62.0(3) . . . . ?
C027 Hf2 C71 C72 76.7(3) . . . . ?
N1 Hf1 N2 C2 -173.3(2) . . . . ?
O2 Hf1 N2 C2 3.79(17) . . . . ?
O1 Hf1 N2 C2 -166.18(17) . . . . ?
O3 Hf1 N2 C2 17.8(3) . . . . ?
C28 Hf1 N2 C2 94.8(2) . . . . ?
C35 Hf1 N2 C2 -77.5(2) . . . . ?
C1 Hf1 N2 C2 -169.11(18) . . . . ?
N1 Hf1 N2 C5 6.6(3) . . . . ?
O2 Hf1 N2 C5 -176.3(3) . . . . ?
O1 Hf1 N2 C5 13.8(4) . . . . ?
O3 Hf1 N2 C5 -162.3(3) . . . . ?
C28 Hf1 N2 C5 -85.2(3) . . . . ?
C35 Hf1 N2 C5 102.5(3) . . . . ?
C2 Hf1 N2 C5 180.0(4) . . . . ?
C1 Hf1 N2 C5 10.8(3) . . . . ?
N2 Hf1 N1 C1 171.9(2) . . . . ?
O2 Hf1 N1 C1 168.18(17) . . . . ?
O1 Hf1 N1 C1 -2.52(18) . . . . ?
O3 Hf1 N1 C1 -19.1(3) . . . . ?
C28 Hf1 N1 C1 -94.4(2) . . . . ?
C35 Hf1 N1 C1 79.1(2) . . . . ?
C2 Hf1 N1 C1 168.39(18) . . . . ?
N2 Hf1 N1 C3 -8.6(3) . . . . ?
O2 Hf1 N1 C3 -12.3(4) . . . . ?
O1 Hf1 N1 C3 177.0(3) . . . . ?
O3 Hf1 N1 C3 160.3(3) . . . . ?
C28 Hf1 N1 C3 85.1(3) . . . . ?
C35 Hf1 N1 C3 -101.4(3) . . . . ?
C2 Hf1 N1 C3 -12.1(3) . . . . ?
C1 Hf1 N1 C3 179.5(4) . . . . ?
C38 C39 C40 C41 0.5(6) . . . . ?
C36 C41 C40 C39 -0.2(6) . . . . ?
C31 C32 C33 C34 0.9(7) . . . . ?
C1 N1 C3 C4 -143.9(3) . . . . ?
Hf1 N1 C3 C4 36.7(4) . . . . ?
Hf2 O5 C027 N4 3.9(3) . . . . ?
Hf2 O5 C027 C61 -173.5(2) . . . . ?
C48 N4 C027 O5 175.4(3) . . . . ?
Hf2 N4 C027 O5 -3.9(3) . . . . ?
C48 N4 C027 C61 -7.4(5) . . . . ?
Hf2 N4 C027 C61 173.2(3) . . . . ?
C48 N4 C027 Hf2 179.4(4) . . . . ?
N4 Hf2 C027 O5 175.7(3) . . . . ?
N3 Hf2 C027 O5 -177.95(18) . . . . ?
O4 Hf2 C027 O5 -148.2(3) . . . . ?
O6 Hf2 C027 O5 7.3(2) . . . . ?
C71 Hf2 C027 O5 87.29(19) . . . . ?
C78 Hf2 C027 O5 -82.62(19) . . . . ?
C050 Hf2 C027 O5 -170.40(17) . . . . ?
N3 Hf2 C027 N4 6.4(2) . . . . ?
O4 Hf2 C027 N4 36.1(5) . . . . ?
O5 Hf2 C027 N4 -175.7(3) . . . . ?
O6 Hf2 C027 N4 -168.40(18) . . . . ?
C71 Hf2 C027 N4 -88.39(19) . . . . ?
C78 Hf2 C027 N4 101.7(2) . . . . ?
C050 Hf2 C027 N4 13.9(2) . . . . ?
N4 Hf2 C027 C61 -130.4(18) . . . . ?
N3 Hf2 C027 C61 -124.0(17) . . . . ?
O4 Hf2 C027 C61 -94.3(18) . . . . ?
O5 Hf2 C027 C61 53.9(17) . . . . ?
O6 Hf2 C027 C61 61.2(18) . . . . ?
C71 Hf2 C027 C61 141.2(17) . . . . ?
C78 Hf2 C027 C61 -28.7(17) . . . . ?
C050 Hf2 C027 C61 -116.5(17) . . . . ?
Hf1 O2 C2 N2 5.9(3) . . . . ?
Hf1 O2 C2 C18 -171.3(2) . . . . ?
C5 N2 C2 O2 174.1(3) . . . . ?
Hf1 N2 C2 O2 -6.0(3) . . . . ?
C5 N2 C2 C18 -9.1(5) . . . . ?
Hf1 N2 C2 C18 170.9(3) . . . . ?
C5 N2 C2 Hf1 -180.0(4) . . . . ?
N1 Hf1 C2 O2 -179.72(17) . . . . ?
N2 Hf1 C2 O2 173.4(3) . . . . ?
O1 Hf1 C2 O2 -146.3(3) . . . . ?
O3 Hf1 C2 O2 5.4(2) . . . . ?
C28 Hf1 C2 O2 85.49(19) . . . . ?
C35 Hf1 C2 O2 -83.69(19) . . . . ?
C1 Hf1 C2 O2 -171.17(17) . . . . ?
N1 Hf1 C2 N2 6.9(2) . . . . ?
O2 Hf1 C2 N2 -173.4(3) . . . . ?
O1 Hf1 C2 N2 40.3(4) . . . . ?
O3 Hf1 C2 N2 -168.00(18) . . . . ?
C28 Hf1 C2 N2 -87.9(2) . . . . ?
C35 Hf1 C2 N2 102.9(2) . . . . ?
C1 Hf1 C2 N2 15.4(3) . . . . ?
N1 Hf1 C2 C18 -122.2(13) . . . . ?
N2 Hf1 C2 C18 -129.1(14) . . . . ?
O2 Hf1 C2 C18 57.5(13) . . . . ?
O1 Hf1 C2 C18 -88.7(13) . . . . ?
O3 Hf1 C2 C18 62.9(13) . . . . ?
C28 Hf1 C2 C18 143.0(13) . . . . ?
C35 Hf1 C2 C18 -26.2(13) . . . . ?
C1 Hf1 C2 C18 -113.6(13) . . . . ?
C17 C13 C15 C12 -59.8(4) . . . . ?
C10 C13 C15 C12 60.4(4) . . . . ?
O5 C027 C61 C63 110.6(3) . . . . ?
N4 C027 C61 C63 -66.4(4) . . . . ?
Hf2 C027 C61 C63 59.9(18) . . . . ?
O5 C027 C61 C62 -126.2(3) . . . . ?
N4 C027 C61 C62 56.8(4) . . . . ?
Hf2 C027 C61 C62 -176.8(16) . . . . ?
O5 C027 C61 C64 -7.3(4) . . . . ?
N4 C027 C61 C64 175.7(3) . . . . ?
Hf2 C027 C61 C64 -57.9(18) . . . . ?
C13 C15 C12 C16 60.9(4) . . . . ?
C13 C15 C12 C9 -58.7(4) . . . . ?
N4 Hf2 C78 C79 149.9(3) . . . . ?
N3 Hf2 C78 C79 -131.3(3) . . . . ?
O4 Hf2 C78 C79 -71.9(3) . . . . ?
O5 Hf2 C78 C79 90.6(3) . . . . ?
O6 Hf2 C78 C79 9.6(3) . . . . ?
C71 Hf2 C78 C79 9.1(8) . . . . ?
C050 Hf2 C78 C79 -102.0(3) . . . . ?
C027 Hf2 C78 C79 120.3(3) . . . . ?
C45 O3 C42 C43 5.4(4) . . . . ?
Hf1 O3 C42 C43 -160.6(3) . . . . ?
C3 N1 C1 O1 -175.6(3) . . . . ?
Hf1 N1 C1 O1 3.9(3) . . . . ?
C3 N1 C1 C8 6.5(5) . . . . ?
Hf1 N1 C1 C8 -173.9(3) . . . . ?
C3 N1 C1 Hf1 -179.5(4) . . . . ?
Hf1 O1 C1 N1 -3.9(3) . . . . ?
Hf1 O1 C1 C8 174.2(2) . . . . ?
N2 Hf1 C1 N1 -8.3(2) . . . . ?
O2 Hf1 C1 N1 -35.6(5) . . . . ?
O1 Hf1 C1 N1 175.6(3) . . . . ?
O3 Hf1 C1 N1 167.01(18) . . . . ?
C28 Hf1 C1 N1 87.5(2) . . . . ?
C35 Hf1 C1 N1 -102.7(2) . . . . ?
C2 Hf1 C1 N1 -16.4(3) . . . . ?
N1 Hf1 C1 O1 -175.6(3) . . . . ?
N2 Hf1 C1 O1 176.06(18) . . . . ?
O2 Hf1 C1 O1 148.8(3) . . . . ?
O3 Hf1 C1 O1 -8.6(2) . . . . ?
C28 Hf1 C1 O1 -88.1(2) . . . . ?
C35 Hf1 C1 O1 81.6(2) . . . . ?
C2 Hf1 C1 O1 167.95(17) . . . . ?
N1 Hf1 C1 C8 133(2) . . . . ?
N2 Hf1 C1 C8 124.6(19) . . . . ?
O2 Hf1 C1 C8 97.3(19) . . . . ?
O1 Hf1 C1 C8 -51.5(19) . . . . ?
O3 Hf1 C1 C8 -60(2) . . . . ?
C28 Hf1 C1 C8 -139.6(19) . . . . ?
C35 Hf1 C1 C8 30.2(19) . . . . ?
C2 Hf1 C1 C8 116.5(19) . . . . ?
N1 Hf1 C28 C29 -45.8(3) . . . . ?
N2 Hf1 C28 C29 32.5(3) . . . . ?
O2 Hf1 C28 C29 92.9(3) . . . . ?
O1 Hf1 C28 C29 -105.9(3) . . . . ?
O3 Hf1 C28 C29 173.2(3) . . . . ?
C35 Hf1 C28 C29 169.6(6) . . . . ?
C2 Hf1 C28 C29 62.9(3) . . . . ?
C1 Hf1 C28 C29 -75.8(3) . . . . ?
C027 C61 C62 C67 -178.2(3) . . . . ?
C63 C61 C62 C67 -56.5(3) . . . . ?
C64 C61 C62 C67 61.3(3) . . . . ?
C050 C51 C52 C55 180.0(3) . . . . ?
C54 C51 C52 C55 59.8(3) . . . . ?
C53 C51 C52 C55 -57.9(3) . . . . ?
C15 C12 C16 C14 -60.6(4) . . . . ?
C9 C12 C16 C14 59.6(4) . . . . ?
N1 Hf1 C35 C36 -147.8(3) . . . . ?
N2 Hf1 C35 C36 133.7(3) . . . . ?
O2 Hf1 C35 C36 74.1(3) . . . . ?
O1 Hf1 C35 C36 -88.6(3) . . . . ?
O3 Hf1 C35 C36 -6.9(3) . . . . ?
C28 Hf1 C35 C36 -3.4(8) . . . . ?
C2 Hf1 C35 C36 104.2(3) . . . . ?
C1 Hf1 C35 C36 -118.4(3) . . . . ?
C85 O6 C88 C87 6.6(5) . . . . ?
Hf2 O6 C88 C87 -161.1(3) . . . . ?
C86 C87 C88 O6 -19.1(6) . . . . ?
C46 N3 C050 O4 -174.0(3) . . . . ?
Hf2 N3 C050 O4 4.1(3) . . . . ?
C46 N3 C050 C51 9.4(6) . . . . ?
Hf2 N3 C050 C51 -172.6(3) . . . . ?
C46 N3 C050 Hf2 -178.0(4) . . . . ?
Hf2 O4 C050 N3 -4.0(3) . . . . ?
Hf2 O4 C050 C51 173.0(2) . . . . ?
C54 C51 C050 N3 -178.9(3) . . . . ?
C53 C51 C050 N3 -59.6(4) . . . . ?
C52 C51 C050 N3 62.2(4) . . . . ?
C54 C51 C050 O4 4.6(4) . . . . ?
C53 C51 C050 O4 123.9(3) . . . . ?
C52 C51 C050 O4 -114.3(3) . . . . ?
C54 C51 C050 Hf2 52.1(16) . . . . ?
C53 C51 C050 Hf2 171.4(14) . . . . ?
C52 C51 C050 Hf2 -66.9(16) . . . . ?
N4 Hf2 C050 N3 -7.1(2) . . . . ?
O4 Hf2 C050 N3 175.5(3) . . . . ?
O5 Hf2 C050 N3 -35.1(5) . . . . ?
O6 Hf2 C050 N3 167.90(18) . . . . ?
C71 Hf2 C050 N3 87.6(2) . . . . ?
C78 Hf2 C050 N3 -102.5(2) . . . . ?
C027 Hf2 C050 N3 -14.4(3) . . . . ?
N4 Hf2 C050 O4 177.34(17) . . . . ?
N3 Hf2 C050 O4 -175.5(3) . . . . ?
O5 Hf2 C050 O4 149.4(3) . . . . ?
O6 Hf2 C050 O4 -7.6(2) . . . . ?
C71 Hf2 C050 O4 -87.95(19) . . . . ?
C78 Hf2 C050 O4 81.93(19) . . . . ?
C027 Hf2 C050 O4 170.04(16) . . . . ?
N4 Hf2 C050 C51 126.3(15) . . . . ?
N3 Hf2 C050 C51 133.5(16) . . . . ?
O4 Hf2 C050 C51 -51.0(15) . . . . ?
O5 Hf2 C050 C51 98.4(15) . . . . ?
O6 Hf2 C050 C51 -58.7(15) . . . . ?
C71 Hf2 C050 C51 -139.0(15) . . . . ?
C78 Hf2 C050 C51 30.9(15) . . . . ?
C027 Hf2 C050 C51 119.0(15) . . . . ?
C24 C27 C23 C25 -60.8(4) . . . . ?
C24 C27 C23 C20 59.6(4) . . . . ?
C51 C52 C55 C58 59.3(3) . . . . ?
C51 C52 C55 C60 -60.9(4) . . . . ?
C027 N4 C48 C47 148.3(3) . . . . ?
Hf2 N4 C48 C47 -32.6(4) . . . . ?
C50 C47 C48 N4 -65.9(3) . . . . ?
C49 C47 C48 N4 174.5(3) . . . . ?
C46 C47 C48 N4 58.0(4) . . . . ?
O2 C2 C18 C20 -124.5(3) . . . . ?
N2 C2 C18 C20 58.8(4) . . . . ?
Hf1 C2 C18 C20 -177.6(12) . . . . ?
O2 C2 C18 C21 -4.6(4) . . . . ?
N2 C2 C18 C21 178.7(3) . . . . ?
Hf1 C2 C18 C21 -57.7(14) . . . . ?
O2 C2 C18 C19 114.5(3) . . . . ?
N2 C2 C18 C19 -62.3(4) . . . . ?
Hf1 C2 C18 C19 61.4(14) . . . . ?
C24 C21 C18 C2 178.7(3) . . . . ?
C24 C21 C18 C20 -59.8(3) . . . . ?
C24 C21 C18 C19 59.6(4) . . . . ?
C22 C19 C18 C2 179.9(3) . . . . ?
C22 C19 C18 C20 58.3(3) . . . . ?
C22 C19 C18 C21 -60.0(3) . . . . ?
C88 O6 C85 C86 7.8(4) . . . . ?
Hf2 O6 C85 C86 175.5(3) . . . . ?
C87 C86 C85 O6 -19.7(6) . . . . ?
C050 N3 C46 C47 -145.9(3) . . . . ?
Hf2 N3 C46 C47 36.9(4) . . . . ?
C50 C47 C46 N3 63.2(3) . . . . ?
C49 C47 C46 N3 -176.9(3) . . . . ?
C48 C47 C46 N3 -60.3(3) . . . . ?
C79 C80 C81 C82 0.1(6) . . . . ?
C81 C80 C79 C84 0.7(5) . . . . ?
C81 C80 C79 C78 -175.5(4) . . . . ?
Hf2 C78 C79 C84 -85.0(4) . . . . ?
Hf2 C78 C79 C80 90.8(4) . . . . ?
C45 C44 C43 C42 24.5(7) . . . . ?
O3 C42 C43 C44 -18.4(6) . . . . ?
C2 N2 C5 C4 147.2(3) . . . . ?
Hf1 N2 C5 C4 -32.7(4) . . . . ?
C52 C55 C58 C56 -61.3(4) . . . . ?
C60 C55 C58 C56 58.7(4) . . . . ?
Hf2 C71 C72 C73 90.4(4) . . . . ?
Hf2 C71 C72 C77 -85.5(3) . . . . ?
C25 C23 C20 C18 59.5(3) . . . . ?
C27 C23 C20 C18 -60.9(4) . . . . ?
C2 C18 C20 C23 -178.5(3) . . . . ?
C21 C18 C20 C23 60.2(3) . . . . ?
C19 C18 C20 C23 -58.3(3) . . . . ?
C55 C58 C56 C59 -59.3(4) . . . . ?
C55 C58 C56 C53 61.2(3) . . . . ?
C57 C59 C56 C58 60.4(4) . . . . ?
C57 C59 C56 C53 -60.0(4) . . . . ?
C40 C41 C36 C37 -0.3(5) . . . . ?
C40 C41 C36 C35 175.7(4) . . . . ?
Hf1 C35 C36 C37 83.7(4) . . . . ?
Hf1 C35 C36 C41 -92.0(4) . . . . ?
C56 C59 C57 C60 -61.2(3) . . . . ?
C56 C59 C57 C54 59.2(4) . . . . ?
C58 C56 C53 C51 -59.1(3) . . . . ?
C59 C56 C53 C51 61.5(4) . . . . ?
C050 C51 C53 C56 178.8(3) . . . . ?
C54 C51 C53 C56 -60.4(3) . . . . ?
C52 C51 C53 C56 57.6(3) . . . . ?
C18 C21 C24 C26 -60.1(4) . . . . ?
C18 C21 C24 C27 59.9(4) . . . . ?
C23 C27 C24 C26 61.2(4) . . . . ?
C23 C27 C24 C21 -59.1(4) . . . . ?
C27 C23 C25 C22 59.6(4) . . . . ?
C20 C23 C25 C22 -61.0(4) . . . . ?
C69 C65 C70 C67 60.5(4) . . . . ?
C64 C65 C70 C67 -59.9(4) . . . . ?
C59 C57 C60 C55 61.0(4) . . . . ?
C54 C57 C60 C55 -59.7(4) . . . . ?
C58 C55 C60 C57 -59.6(4) . . . . ?
C52 C55 C60 C57 60.3(4) . . . . ?
N1 C1 C8 C11 -58.8(4) . . . . ?
O1 C1 C8 C11 123.5(3) . . . . ?
Hf1 C1 C8 C11 171.9(18) . . . . ?
N1 C1 C8 C9 -177.6(3) . . . . ?
O1 C1 C8 C9 4.6(4) . . . . ?
Hf1 C1 C8 C9 53(2) . . . . ?
N1 C1 C8 C10 62.8(4) . . . . ?
O1 C1 C8 C10 -115.0(3) . . . . ?
Hf1 C1 C8 C10 -66(2) . . . . ?
C14 C11 C8 C1 178.8(3) . . . . ?
C14 C11 C8 C9 -60.3(4) . . . . ?
C14 C11 C8 C10 57.7(4) . . . . ?
C18 C19 C22 C25 -59.2(3) . . . . ?
C18 C19 C22 C26 60.7(4) . . . . ?
C23 C25 C22 C19 61.0(4) . . . . ?
C23 C25 C22 C26 -58.6(4) . . . . ?
N1 C3 C4 C6 63.4(3) . . . . ?
N1 C3 C4 C5 -60.6(4) . . . . ?
N1 C3 C4 C7 -177.1(3) . . . . ?
N2 C5 C4 C6 -65.0(3) . . . . ?
N2 C5 C4 C3 58.6(3) . . . . ?
N2 C5 C4 C7 175.6(3) . . . . ?
C12 C16 C14 C17 60.0(4) . . . . ?
C12 C16 C14 C11 -59.9(4) . . . . ?
C8 C11 C14 C17 -59.3(4) . . . . ?
C8 C11 C14 C16 61.1(4) . . . . ?
Hf1 C28 C29 C34 -87.1(4) . . . . ?
Hf1 C28 C29 C30 89.2(4) . . . . ?
C15 C12 C9 C8 58.3(4) . . . . ?
C16 C12 C9 C8 -61.0(4) . . . . ?
C1 C8 C9 C12 -178.3(3) . . . . ?
C11 C8 C9 C12 60.5(4) . . . . ?
C10 C8 C9 C12 -58.4(4) . . . . ?
C65 C70 C67 C68 -59.6(4) . . . . ?
C65 C70 C67 C62 60.8(4) . . . . ?
C61 C62 C67 C68 57.8(4) . . . . ?
C61 C62 C67 C70 -62.3(4) . . . . ?
C69 C66 C63 C61 61.2(4) . . . . ?
C68 C66 C63 C61 -58.7(4) . . . . ?
C027 C61 C63 C66 -179.3(3) . . . . ?
C62 C61 C63 C66 57.3(4) . . . . ?
C64 C61 C63 C66 -60.1(4) . . . . ?
C60 C57 C54 C51 60.0(4) . . . . ?
C59 C57 C54 C51 -60.1(4) . . . . ?
C050 C51 C54 C57 -179.0(3) . . . . ?
C53 C51 C54 C57 59.9(3) . . . . ?
C52 C51 C54 C57 -59.3(3) . . . . ?
C70 C65 C64 C61 60.4(4) . . . . ?
C69 C65 C64 C61 -59.9(4) . . . . ?
C027 C61 C64 C65 178.1(3) . . . . ?
C63 C61 C64 C65 59.7(3) . . . . ?
C62 C61 C64 C65 -60.3(4) . . . . ?
C17 C13 C10 C8 58.5(4) . . . . ?
C15 C13 C10 C8 -61.2(4) . . . . ?
C1 C8 C10 C13 -179.2(3) . . . . ?
C11 C8 C10 C13 -57.0(4) . . . . ?
C9 C8 C10 C13 60.1(4) . . . . ?
C16 C14 C17 C13 -59.2(4) . . . . ?
C11 C14 C17 C13 61.0(4) . . . . ?
C10 C13 C17 C14 -61.2(4) . . . . ?
C15 C13 C17 C14 58.6(4) . . . . ?
C40 C39 C38 C37 -0.4(6) . . . . ?
C42 O3 C45 C44 9.1(4) . . . . ?
Hf1 O3 C45 C44 175.1(3) . . . . ?
C43 C44 C45 O3 -20.7(6) . . . . ?
C32 C33 C34 C29 0.6(6) . . . . ?
C30 C29 C34 C33 -1.9(5) . . . . ?
C28 C29 C34 C33 174.6(4) . . . . ?
C68 C66 C69 C65 59.5(4) . . . . ?
C63 C66 C69 C65 -60.2(4) . . . . ?
C70 C65 C69 C66 -60.8(4) . . . . ?
C64 C65 C69 C66 59.5(4) . . . . ?
C73 C72 C77 C76 -0.8(5) . . . . ?
C71 C72 C77 C76 175.3(3) . . . . ?
C74 C75 C76 C77 0.8(6) . . . . ?
C72 C77 C76 C75 -0.1(6) . . . . ?
C21 C24 C26 C22 60.3(4) . . . . ?
C27 C24 C26 C22 -60.3(4) . . . . ?
C19 C22 C26 C24 -60.6(4) . . . . ?
C25 C22 C26 C24 59.0(4) . . . . ?
C33 C32 C31 C30 -1.0(7) . . . . ?
C80 C79 C84 C83 -0.6(5) . . . . ?
C78 C79 C84 C83 175.5(4) . . . . ?
C75 C74 C73 C72 -0.5(6) . . . . ?
C77 C72 C73 C74 1.1(5) . . . . ?
C71 C72 C73 C74 -174.9(3) . . . . ?
C39 C38 C37 C36 -0.1(6) . . . . ?
C41 C36 C37 C38 0.4(5) . . . . ?
C35 C36 C37 C38 -175.6(4) . . . . ?
C70 C67 C68 C66 58.8(4) . . . . ?
C62 C67 C68 C66 -60.9(4) . . . . ?
C69 C66 C68 C67 -58.8(4) . . . . ?
C63 C66 C68 C67 61.1(4) . . . . ?
C34 C29 C30 C31 1.8(5) . . . . ?
C28 C29 C30 C31 -174.6(4) . . . . ?
C32 C31 C30 C29 -0.4(6) . . . . ?
C79 C84 C83 C82 -0.3(6) . . . . ?
C84 C83 C82 C81 1.1(7) . . . . ?
C80 C81 C82 C83 -1.0(6) . . . . ?
 
_diffrn_measured_fraction_theta_max    0.852
_diffrn_reflns_theta_full              27.88
_diffrn_measured_fraction_theta_full   0.852
_refine_diff_density_max    1.614
_refine_diff_density_min   -1.557
_refine_diff_density_rms    0.105

#===END

 
data_ls094monfin
 
_audit_creation_method            SHELXL-97
_chemical_name_systematic
;
 ?
;
_chemical_name_common             ?
_chemical_melting_point           ?
_chemical_formula_moiety          'C58 H68 N4 O2 Zr'
_chemical_formula_sum
 'C58 H68 N4 O2 Zr'
_chemical_formula_weight          944.38
 
loop_
 _atom_type_symbol
 _atom_type_description
 _atom_type_scat_dispersion_real
 _atom_type_scat_dispersion_imag
 _atom_type_scat_source
 'C'  'C'   0.0033   0.0016
 'International Tables Vol C Tables 4.2.6.8 and 6.1.1.4'
 'H'  'H'   0.0000   0.0000
 'International Tables Vol C Tables 4.2.6.8 and 6.1.1.4'
 'N'  'N'   0.0061   0.0033
 'International Tables Vol C Tables 4.2.6.8 and 6.1.1.4'
 'O'  'O'   0.0106   0.0060
 'International Tables Vol C Tables 4.2.6.8 and 6.1.1.4'
 'Zr'  'Zr'  -2.9673   0.5597
 'International Tables Vol C Tables 4.2.6.8 and 6.1.1.4'
 
_symmetry_cell_setting            Monoclinic
_symmetry_space_group_name_H-M    'P21/c'
 
loop_
 _symmetry_equiv_pos_as_xyz
 'x, y, z'
 '-x, y+1/2, -z+1/2'
 '-x, -y, -z'
 'x, -y-1/2, z-1/2'
 
_cell_length_a                    19.475(5)
_cell_length_b                    12.736(5)
_cell_length_c                    20.838(5)
_cell_angle_alpha                 90.000(5)
_cell_angle_beta                  90.379(5)
_cell_angle_gamma                 90.000(5)
_cell_volume                      5168(3)
_cell_formula_units_Z             4
_cell_measurement_temperature     293(2)
_cell_measurement_reflns_used     ?
_cell_measurement_theta_min       2.27
_cell_measurement_theta_max       22.65
 
_exptl_crystal_description        Block
_exptl_crystal_colour             Colorless
_exptl_crystal_size_max           0.34
_exptl_crystal_size_mid           0.30
_exptl_crystal_size_min           0.25
_exptl_crystal_density_meas       ?
_exptl_crystal_density_diffrn     1.214
_exptl_crystal_density_method     'not measured'
_exptl_crystal_F_000              2000
_exptl_absorpt_coefficient_mu     0.257
_exptl_absorpt_correction_type    'Multi-scan'
_exptl_absorpt_correction_T_min   ?
_exptl_absorpt_correction_T_max   ?
_exptl_absorpt_process_details    ?
 
_exptl_special_details
;
 ?
;
 
_diffrn_ambient_temperature       173(2)
_diffrn_radiation_wavelength      0.71073
_diffrn_radiation_type            MoK\a
_diffrn_radiation_source          'fine-focus sealed tube'
_diffrn_radiation_monochromator   graphite
_diffrn_measurement_device_type   'Bruker X8'
_diffrn_measurement_method        ?
_diffrn_detector_area_resol_mean  ?
_diffrn_standards_number          ?
_diffrn_standards_interval_count  ?
_diffrn_standards_interval_time   ?
_diffrn_standards_decay_%         ?
_diffrn_reflns_number             48486
_diffrn_reflns_av_R_equivalents   0.1066
_diffrn_reflns_av_sigmaI/netI     0.0708
_diffrn_reflns_limit_h_min        -20
_diffrn_reflns_limit_h_max        20
_diffrn_reflns_limit_k_min        -13
_diffrn_reflns_limit_k_max        13
_diffrn_reflns_limit_l_min        -22
_diffrn_reflns_limit_l_max        18
_diffrn_reflns_theta_min          2.14
_diffrn_reflns_theta_max          22.65
_reflns_number_total              6785
_reflns_number_gt                 4552
_reflns_threshold_expression      >2sigma(I)
 
_computing_data_collection        ?
_computing_cell_refinement        CrystalClear
_computing_data_reduction         CrystalClear
_computing_structure_solution     SIR-97
_computing_structure_refinement   'SHELXL-97 (Sheldrick, 1997)'
_computing_molecular_graphics     'ORTEP-3 (Farrugia, 1997)'
_computing_publication_material   'PLATON (Spek, 1990)'
 
_refine_special_details
;
 Refinement of F^2^ against ALL reflections.  The weighted R-factor wR and
 goodness of fit S are based on F^2^, conventional R-factors R are based
 on F, with F set to zero for negative F^2^. The threshold expression of
 F^2^ > 2sigma(F^2^) is used only for calculating R-factors(gt) etc. and is
 not relevant to the choice of reflections for refinement.  R-factors based
 on F^2^ are statistically about twice as large as those based on F, and R-
 factors based on ALL data will be even larger.
;
 
_refine_ls_structure_factor_coef  Fsqd
_refine_ls_matrix_type            full
_refine_ls_weighting_scheme       calc
_refine_ls_weighting_details
 'calc w=1/[\s^2^(Fo^2^)+(0.1343P)^2^+19.4337P] where P=(Fo^2^+2Fc^2^)/3'
_atom_sites_solution_primary      direct
_atom_sites_solution_secondary    difmap
_atom_sites_solution_hydrogens    geom
_refine_ls_hydrogen_treatment     mixed
_refine_ls_extinction_method      none
_refine_ls_extinction_coef        ?
_refine_ls_number_reflns          6785
_refine_ls_number_parameters      586
_refine_ls_number_restraints      12
_refine_ls_R_factor_all           0.1215
_refine_ls_R_factor_gt            0.0762
_refine_ls_wR_factor_ref          0.2504
_refine_ls_wR_factor_gt           0.2045
_refine_ls_goodness_of_fit_ref    1.055
_refine_ls_restrained_S_all       1.089
_refine_ls_shift/su_max           0.001
_refine_ls_shift/su_mean          0.000
 
loop_
 _atom_site_label
 _atom_site_type_symbol
 _atom_site_fract_x
 _atom_site_fract_y
 _atom_site_fract_z
 _atom_site_U_iso_or_equiv
 _atom_site_adp_type
 _atom_site_occupancy
 _atom_site_symmetry_multiplicity
 _atom_site_calc_flag
 _atom_site_refinement_flags
 _atom_site_disorder_assembly
 _atom_site_disorder_group
Zr1 Zr 0.25183(3) 0.98986(5) 0.86850(3) 0.0324(3) Uani 1 1 d . . .
O1 O 0.1994(3) 0.8516(4) 0.8263(3) 0.0470(14) Uani 1 1 d . . .
N3 N 0.1811(3) 0.9741(5) 0.9524(3) 0.0360(15) Uani 1 1 d . . .
O2 O 0.3073(3) 0.9752(4) 0.7764(3) 0.0478(14) Uani 1 1 d . . .
N4 N 0.3247(3) 1.1226(5) 0.8890(3) 0.0358(15) Uani 1 1 d . . .
N2 N 0.2146(3) 1.0726(5) 0.7745(3) 0.0453(17) Uani 1 1 d . . .
C29 C 0.1506(4) 0.9274(6) 1.0089(4) 0.0402(19) Uani 1 1 d . . .
N1 N 0.2911(3) 0.8179(5) 0.8832(3) 0.0444(17) Uani 1 1 d . . .
C4 C 0.3460(4) 1.0440(6) 0.9221(4) 0.0379(18) Uani 1 1 d . . .
C45 C 0.4159(4) 1.2295(7) 0.8401(4) 0.048(2) Uani 1 1 d . . .
C52 C 0.4127(4) 1.0416(7) 0.9589(4) 0.048(2) Uani 1 1 d . . .
H52A H 0.4400 0.9831 0.9437 0.057 Uiso 1 1 calc R . .
H52B H 0.4379 1.1056 0.9501 0.057 Uiso 1 1 calc R . .
C41 C 0.0871(7) 1.4290(11) 0.9646(11) 0.116(6) Uani 1 1 d . . .
H41 H 0.0863 1.5009 0.9721 0.139 Uiso 1 1 calc R . .
C44 C 0.3601(4) 1.2215(6) 0.8819(4) 0.0380(18) Uani 1 1 d . . .
C49 C 0.3371(4) 1.3081(6) 0.9172(4) 0.042(2) Uani 1 1 d . . .
C17 C 0.1588(5) 1.1346(7) 0.7501(4) 0.051(2) Uani 1 1 d . . .
C40 C 0.0898(6) 1.3596(14) 1.0150(8) 0.106(5) Uani 1 1 d . . .
H40 H 0.0904 1.3850 1.0569 0.127 Uiso 1 1 calc R . .
C3 C 0.1565(4) 1.0477(6) 0.9178(4) 0.0392(19) Uani 1 1 d . . .
C30 C 0.1051(4) 0.8427(7) 1.0023(4) 0.047(2) Uani 1 1 d . . .
C53 C 0.4040(4) 1.0315(8) 1.0298(5) 0.057(3) Uani 1 1 d . . .
C48 C 0.3722(5) 1.4019(6) 0.9112(5) 0.056(2) Uani 1 1 d . . .
H48 H 0.3580 1.4603 0.9345 0.067 Uiso 1 1 calc R . .
C36 C 0.2209(5) 1.0569(8) 1.0747(4) 0.060(2) Uani 1 1 d . . .
H36A H 0.2331 1.0810 1.0327 0.091 Uiso 1 1 calc R . .
H36B H 0.2615 1.0347 1.0973 0.091 Uiso 1 1 calc R . .
H36C H 0.1993 1.1128 1.0979 0.091 Uiso 1 1 calc R . .
C22 C 0.1675(5) 1.2430(8) 0.7436(4) 0.057(2) Uani 1 1 d . . .
C9 C 0.4641(4) 0.7038(6) 0.9131(5) 0.055(2) Uani 1 1 d . . .
H9 H 0.5064 0.6990 0.8928 0.066 Uiso 1 1 calc R . .
C10 C 0.4109(4) 0.7567(6) 0.8826(4) 0.046(2) Uani 1 1 d . . .
C43 C 0.0872(5) 1.2851(7) 0.8931(5) 0.060(3) Uani 1 1 d . . .
H43 H 0.0868 1.2602 0.8511 0.072 Uiso 1 1 calc R . .
C39 C 0.0916(4) 1.2531(10) 1.0043(5) 0.069(3) Uani 1 1 d . . .
H39 H 0.0942 1.2074 1.0391 0.083 Uiso 1 1 calc R . .
C31 C 0.0822(4) 0.7940(8) 1.0579(5) 0.063(3) Uani 1 1 d . . .
H31 H 0.0529 0.7366 1.0546 0.075 Uiso 1 1 calc R . .
C5 C 0.3464(4) 0.7605(6) 0.9116(5) 0.049(2) Uani 1 1 d . . .
C51 C 0.2759(4) 1.2972(7) 0.9602(4) 0.057(2) Uani 1 1 d . . .
H51A H 0.2670 1.3632 0.9809 0.085 Uiso 1 1 calc R . .
H51B H 0.2850 1.2446 0.9921 0.085 Uiso 1 1 calc R . .
H51C H 0.2365 1.2770 0.9352 0.085 Uiso 1 1 calc R . .
C34 C 0.1717(4) 0.9653(7) 1.0688(4) 0.051(2) Uani 1 1 d . . .
C37 C 0.0873(4) 1.0983(7) 0.9301(5) 0.058(2) Uani 1 1 d . . .
H37A H 0.0580 1.0866 0.8930 0.070 Uiso 1 1 calc R . .
H37B H 0.0662 1.0634 0.9664 0.070 Uiso 1 1 calc R . .
C21 C 0.1130(6) 1.3026(9) 0.7195(5) 0.075(3) Uani 1 1 d . . .
H21 H 0.1188 1.3745 0.7135 0.090 Uiso 1 1 calc R . .
C46 C 0.4490(5) 1.3257(7) 0.8359(5) 0.060(2) Uani 1 1 d . . .
H46 H 0.4863 1.3327 0.8086 0.072 Uiso 1 1 calc R . .
C2 C 0.2634(5) 1.0266(7) 0.7416(4) 0.052(2) Uani 1 1 d . A .
C35 C 0.0792(4) 0.8074(8) 0.9373(4) 0.062(3) Uani 1 1 d . . .
H35A H 0.0488 0.7487 0.9425 0.093 Uiso 1 1 calc R . .
H35B H 0.1173 0.7871 0.9112 0.093 Uiso 1 1 calc R . .
H35C H 0.0549 0.8641 0.9170 0.093 Uiso 1 1 calc R . .
C38 C 0.0897(4) 1.2132(7) 0.9435(4) 0.046(2) Uani 1 1 d . . .
C20 C 0.0512(6) 1.2576(10) 0.7044(5) 0.079(3) Uani 1 1 d . . .
H20 H 0.0158 1.2983 0.6876 0.095 Uiso 1 1 calc R . .
C18 C 0.0956(5) 1.0882(8) 0.7370(5) 0.065(3) Uani 1 1 d . . .
C54 C 0.4001(5) 1.1187(10) 1.0681(5) 0.080(3) Uani 1 1 d . . .
H54 H 0.4026 1.1852 1.0498 0.096 Uiso 1 1 calc R . .
C1 C 0.2437(4) 0.7814(7) 0.8444(5) 0.056(2) Uani 1 1 d . . .
C19 C 0.0419(6) 1.1506(10) 0.7143(5) 0.083(3) Uani 1 1 d . . .
H19 H -0.0007 1.1204 0.7056 0.100 Uiso 1 1 calc R . .
C47 C 0.4284(5) 1.4098(8) 0.8707(5) 0.066(3) Uani 1 1 d . . .
H47 H 0.4519 1.4731 0.8675 0.079 Uiso 1 1 calc R . .
C24 C 0.0837(6) 0.9717(9) 0.7488(6) 0.092(4) Uani 1 1 d . . .
H24A H 0.0374 0.9539 0.7370 0.138 Uiso 1 1 calc R . .
H24B H 0.0910 0.9563 0.7934 0.138 Uiso 1 1 calc R . .
H24C H 0.1151 0.9315 0.7234 0.138 Uiso 1 1 calc R . .
C33 C 0.1454(5) 0.9145(10) 1.1218(5) 0.080(3) Uani 1 1 d . . .
H33 H 0.1574 0.9387 1.1625 0.096 Uiso 1 1 calc R . .
C12 C 0.4234(5) 0.8085(8) 0.8182(5) 0.068(3) Uani 1 1 d . . .
H12A H 0.3819 0.8417 0.8035 0.101 Uiso 1 1 calc R . .
H12B H 0.4372 0.7564 0.7876 0.101 Uiso 1 1 calc R . .
H12C H 0.4589 0.8603 0.8226 0.101 Uiso 1 1 calc R . .
C50 C 0.4408(5) 1.1364(7) 0.8024(5) 0.068(3) Uani 1 1 d . . .
H50A H 0.4120 1.0770 0.8110 0.102 Uiso 1 1 calc R . .
H50B H 0.4872 1.1205 0.8147 0.102 Uiso 1 1 calc R . .
H50C H 0.4390 1.1524 0.7574 0.102 Uiso 1 1 calc R . .
C42 C 0.0855(6) 1.3909(9) 0.9036(8) 0.092(4) Uani 1 1 d . . .
H42 H 0.0833 1.4370 0.8690 0.110 Uiso 1 1 calc R . .
C32 C 0.1018(5) 0.8284(9) 1.1164(5) 0.080(3) Uani 1 1 d . . .
H32 H 0.0861 0.7947 1.1531 0.096 Uiso 1 1 calc R . .
C23 C 0.2334(6) 1.2959(8) 0.7636(5) 0.081(3) Uani 1 1 d . . .
H23A H 0.2298 1.3700 0.7559 0.122 Uiso 1 1 calc R . .
H23B H 0.2707 1.2676 0.7393 0.122 Uiso 1 1 calc R . .
H23C H 0.2415 1.2837 0.8085 0.122 Uiso 1 1 calc R . .
C8 C 0.4563(5) 0.6590(7) 0.9716(6) 0.070(3) Uani 1 1 d . . .
H8 H 0.4925 0.6235 0.9911 0.083 Uiso 1 1 calc R . .
C11 C 0.2708(7) 0.7295(15) 1.0063(10) 0.232(14) Uani 1 1 d . . .
H11A H 0.2396 0.7672 0.9788 0.348 Uiso 1 1 calc R . .
H11B H 0.2770 0.7676 1.0457 0.348 Uiso 1 1 calc R . .
H11C H 0.2522 0.6613 1.0154 0.348 Uiso 1 1 calc R . .
C6 C 0.3391(5) 0.7176(9) 0.9733(7) 0.099(5) Uani 1 1 d . . .
C55 C 0.3926(6) 1.1085(18) 1.1339(7) 0.137(8) Uani 1 1 d . . .
H55 H 0.3913 1.1680 1.1598 0.164 Uiso 1 1 calc R . .
C7 C 0.3928(6) 0.6671(9) 1.0020(7) 0.104(5) Uani 1 1 d . . .
H7 H 0.3872 0.6376 1.0424 0.125 Uiso 1 1 calc R . .
C58 C 0.3994(5) 0.9350(10) 1.0593(7) 0.101(5) Uani 1 1 d . . .
H58 H 0.4019 0.8741 1.0349 0.122 Uiso 1 1 calc R . .
C56 C 0.3872(9) 1.014(3) 1.1600(10) 0.171(15) Uani 1 1 d . . .
H56 H 0.3805 1.0091 1.2040 0.205 Uiso 1 1 calc R . .
C57 C 0.3908(9) 0.928(2) 1.1258(11) 0.163(12) Uani 1 1 d . . .
H57 H 0.3878 0.8627 1.1456 0.195 Uiso 1 1 calc R . .
C28 C 0.3452(7) 1.0012(12) 0.6522(6) 0.134(6) Uani 1 1 d D A 1
H28A H 0.3790 1.0309 0.6806 0.201 Uiso 0.50 1 calc PR A 1
H28B H 0.3560 1.0193 0.6087 0.201 Uiso 0.50 1 calc PR A 1
H28C H 0.3450 0.9262 0.6568 0.201 Uiso 0.50 1 calc PR A 1
H28D H 0.3410 0.9534 0.6168 0.201 Uiso 0.50 1 calc PR A 1
H28E H 0.3640 0.9649 0.6887 0.201 Uiso 0.50 1 calc PR A 1
H28F H 0.3751 1.0580 0.6406 0.201 Uiso 0.50 1 calc PR A 1
C26 C 0.2222(8) 1.0099(15) 0.6293(6) 0.154(8) Uani 1 1 d D A 1
H26A H 0.1815 1.0447 0.6440 0.232 Uiso 0.50 1 calc PR A 1
H26B H 0.2162 0.9353 0.6326 0.232 Uiso 0.50 1 calc PR A 1
H26C H 0.2303 1.0285 0.5854 0.232 Uiso 0.50 1 calc PR A 1
H26D H 0.2372 0.9610 0.5973 0.232 Uiso 0.50 1 calc PR A 1
H26E H 0.2025 1.0704 0.6087 0.232 Uiso 0.50 1 calc PR A 1
H26F H 0.1883 0.9772 0.6560 0.232 Uiso 0.50 1 calc PR A 1
C27 C 0.2868(13) 1.1613(14) 0.6469(10) 0.36(3) Uani 1 1 d D A .
H27A H 0.2962 1.1650 0.6018 0.538 Uiso 0.50 1 calc PR . .
H27B H 0.3239 1.1930 0.6705 0.538 Uiso 0.50 1 calc PR . .
H27C H 0.2449 1.1980 0.6559 0.538 Uiso 0.50 1 calc PR . .
H27D H 0.2805 1.2057 0.6837 0.538 Uiso 0.50 1 calc PR . .
H27E H 0.2528 1.1776 0.6150 0.538 Uiso 0.50 1 calc PR . .
H27F H 0.3318 1.1727 0.6296 0.538 Uiso 0.50 1 calc PR . .
C25 C 0.2793(7) 1.0416(12) 0.6678(5) 0.145(7) Uani 1 1 d D . .
C15 C 0.1632(4) 0.6489(7) 0.8009(4) 0.057(2) Uani 1 1 d D . .
H15A H 0.1291 0.6857 0.8252 0.086 Uiso 0.50 1 calc PR . .
H15B H 0.1525 0.5753 0.8003 0.086 Uiso 0.50 1 calc PR . .
H15C H 0.1635 0.6754 0.7577 0.086 Uiso 0.50 1 calc PR . .
H15D H 0.1677 0.6053 0.7636 0.086 Uiso 0.50 1 calc PR . .
H15E H 0.1442 0.7156 0.7886 0.086 Uiso 0.50 1 calc PR . .
H15F H 0.1332 0.6155 0.8311 0.086 Uiso 0.50 1 calc PR . .
C16 C 0.2886(5) 0.6124(9) 0.8017(6) 0.098(4) Uani 1 1 d D . .
H16A H 0.3295 0.6265 0.8262 0.147 Uiso 0.50 1 calc PR . .
H16B H 0.2943 0.6375 0.7586 0.147 Uiso 0.50 1 calc PR . .
H16C H 0.2802 0.5381 0.8009 0.147 Uiso 0.50 1 calc PR . .
H16D H 0.2732 0.5749 0.7643 0.147 Uiso 0.50 1 calc PR . .
H16E H 0.3084 0.5639 0.8318 0.147 Uiso 0.50 1 calc PR . .
H16F H 0.3225 0.6633 0.7895 0.147 Uiso 0.50 1 calc PR . .
C14 C 0.2244(9) 0.5918(13) 0.8943(9) 0.235(13) Uani 1 1 d D . .
H14A H 0.1872 0.6168 0.9202 0.352 Uiso 0.50 1 calc PR . .
H14B H 0.2664 0.5949 0.9187 0.352 Uiso 0.50 1 calc PR . .
H14C H 0.2157 0.5205 0.8817 0.352 Uiso 0.50 1 calc PR . .
H14D H 0.2590 0.5380 0.8936 0.352 Uiso 0.50 1 calc PR . .
H14E H 0.1798 0.5599 0.8950 0.352 Uiso 0.50 1 calc PR . .
H14F H 0.2305 0.6343 0.9320 0.352 Uiso 0.50 1 calc PR . .
C13 C 0.2313(5) 0.6649(9) 0.8307(7) 0.177(11) Uani 1 1 d D . .
 
loop_
 _atom_site_aniso_label
 _atom_site_aniso_U_11
 _atom_site_aniso_U_22
 _atom_site_aniso_U_33
 _atom_site_aniso_U_23
 _atom_site_aniso_U_13
 _atom_site_aniso_U_12
Zr1 0.0284(5) 0.0322(5) 0.0366(5) -0.0019(3) 0.0059(3) 0.0010(3)
O1 0.033(3) 0.041(3) 0.067(4) -0.014(3) 0.002(3) 0.003(3)
N3 0.031(3) 0.037(4) 0.040(4) 0.000(3) -0.001(3) -0.003(3)
O2 0.046(3) 0.047(3) 0.051(3) -0.011(3) 0.012(3) 0.004(3)
N4 0.034(4) 0.036(4) 0.038(4) -0.006(3) 0.010(3) -0.001(3)
N2 0.049(4) 0.046(4) 0.041(4) -0.002(3) 0.004(3) 0.003(3)
C29 0.029(4) 0.053(5) 0.039(5) 0.010(4) 0.006(3) -0.003(4)
N1 0.028(4) 0.035(4) 0.070(5) 0.002(3) 0.006(3) -0.002(3)
C4 0.029(4) 0.038(4) 0.047(5) 0.000(4) 0.011(4) 0.003(3)
C45 0.032(5) 0.058(5) 0.054(5) 0.005(4) 0.009(4) -0.008(4)
C52 0.033(5) 0.052(5) 0.059(6) 0.007(4) 0.000(4) -0.004(4)
C41 0.088(10) 0.066(9) 0.195(19) -0.046(11) 0.034(11) 0.001(7)
C44 0.035(4) 0.031(4) 0.048(5) 0.003(4) -0.001(4) 0.000(3)
C49 0.035(4) 0.036(5) 0.054(5) -0.002(4) -0.007(4) 0.005(4)
C17 0.059(6) 0.063(6) 0.030(5) -0.003(4) -0.002(4) 0.006(5)
C40 0.067(8) 0.137(14) 0.114(12) -0.072(11) 0.016(8) -0.005(9)
C3 0.032(4) 0.040(5) 0.046(5) -0.002(4) 0.004(4) -0.001(4)
C30 0.034(5) 0.057(5) 0.051(5) 0.011(4) 0.006(4) 0.000(4)
C53 0.026(4) 0.079(7) 0.066(6) 0.028(6) -0.013(4) -0.017(4)
C48 0.058(6) 0.034(5) 0.075(7) -0.005(4) -0.010(5) 0.001(4)
C36 0.058(6) 0.082(7) 0.041(5) -0.005(5) 0.000(4) -0.012(5)
C22 0.064(6) 0.070(7) 0.037(5) 0.011(5) -0.002(4) 0.004(5)
C9 0.036(5) 0.041(5) 0.087(7) -0.003(5) 0.008(5) 0.003(4)
C10 0.033(5) 0.039(5) 0.068(6) -0.010(4) 0.006(4) 0.000(4)
C43 0.062(6) 0.055(6) 0.064(6) -0.003(5) 0.025(5) 0.002(5)
C39 0.036(5) 0.116(10) 0.054(6) -0.009(6) 0.013(4) 0.008(5)
C31 0.043(5) 0.075(7) 0.070(7) 0.028(6) 0.003(5) -0.014(5)
C5 0.035(5) 0.022(4) 0.090(7) 0.003(4) -0.002(4) 0.004(3)
C51 0.050(5) 0.056(6) 0.064(6) -0.026(5) 0.010(4) 0.006(4)
C34 0.037(5) 0.075(6) 0.040(5) 0.011(5) -0.001(4) -0.012(4)
C37 0.031(5) 0.060(6) 0.084(7) 0.011(5) 0.016(4) 0.011(4)
C21 0.097(9) 0.075(7) 0.052(6) 0.012(5) -0.007(6) 0.022(7)
C46 0.053(6) 0.060(6) 0.067(6) 0.010(5) 0.007(5) -0.018(5)
C2 0.054(6) 0.066(6) 0.036(5) -0.012(4) 0.004(4) 0.005(5)
C35 0.048(5) 0.071(6) 0.068(7) -0.010(5) 0.012(5) -0.017(5)
C38 0.024(4) 0.062(6) 0.052(6) 0.000(5) 0.014(4) 0.008(4)
C20 0.075(8) 0.101(9) 0.061(7) 0.006(6) -0.020(6) 0.031(7)
C18 0.069(7) 0.069(7) 0.056(6) -0.005(5) -0.021(5) 0.008(6)
C54 0.056(7) 0.123(10) 0.062(7) -0.007(7) -0.003(5) -0.048(6)
C1 0.030(5) 0.039(5) 0.099(7) -0.010(5) 0.001(5) 0.003(4)
C19 0.069(7) 0.101(9) 0.078(8) 0.001(7) -0.025(6) 0.010(7)
C47 0.067(7) 0.051(6) 0.081(7) 0.012(5) -0.006(6) -0.025(5)
C24 0.077(8) 0.086(8) 0.113(10) -0.001(7) -0.047(7) -0.006(6)
C33 0.082(8) 0.115(9) 0.043(6) 0.020(6) -0.011(5) -0.026(7)
C12 0.048(6) 0.083(7) 0.072(7) -0.006(6) 0.018(5) 0.018(5)
C50 0.056(6) 0.071(7) 0.077(7) -0.011(5) 0.034(5) -0.012(5)
C42 0.080(8) 0.055(7) 0.141(12) 0.005(8) 0.033(8) 0.003(6)
C32 0.067(7) 0.111(9) 0.062(7) 0.041(7) -0.004(5) -0.024(7)
C23 0.096(8) 0.071(7) 0.077(7) 0.023(6) -0.007(6) -0.007(6)
C8 0.053(6) 0.042(5) 0.113(9) 0.015(6) -0.007(6) 0.016(5)
C11 0.113(11) 0.29(2) 0.29(2) 0.26(2) 0.137(14) 0.128(14)
C6 0.067(7) 0.078(8) 0.152(12) 0.081(8) 0.042(7) 0.029(6)
C55 0.065(9) 0.27(2) 0.074(11) -0.029(12) 0.006(7) -0.086(12)
C7 0.080(8) 0.081(8) 0.152(12) 0.075(8) 0.026(8) 0.034(7)
C58 0.045(6) 0.108(10) 0.151(13) 0.078(9) -0.012(7) -0.004(6)
C56 0.047(9) 0.38(5) 0.087(13) 0.085(19) -0.018(8) -0.080(18)
C57 0.073(10) 0.25(3) 0.17(2) 0.17(2) -0.023(13) -0.026(15)
C28 0.146(14) 0.193(17) 0.063(8) 0.022(9) 0.056(9) 0.056(12)
C26 0.147(14) 0.28(3) 0.035(7) -0.006(10) 0.005(8) 0.021(14)
C27 0.77(8) 0.15(2) 0.15(2) 0.097(17) 0.17(3) 0.12(3)
C25 0.145(14) 0.26(2) 0.032(6) -0.045(9) -0.008(8) 0.080(14)
C15 0.068(6) 0.054(5) 0.050(5) -0.006(4) 0.008(5) -0.022(5)
C16 0.096(9) 0.070(7) 0.127(11) -0.059(7) 0.025(8) -0.011(7)
C14 0.37(4) 0.068(11) 0.27(3) 0.075(14) -0.07(2) -0.047(16)
C13 0.053(7) 0.060(8) 0.42(3) -0.125(14) -0.077(12) 0.021(6)
 
_geom_special_details
;
 All esds (except the esd in the dihedral angle between two l.s. planes)
 are estimated using the full covariance matrix.  The cell esds are taken
 into account individually in the estimation of esds in distances, angles
 and torsion angles; correlations between esds in cell parameters are only
 used when they are defined by crystal symmetry.  An approximate (isotropic)
 treatment of cell esds is used for estimating esds involving l.s. planes.
;
 
loop_
 _geom_bond_atom_site_label_1
 _geom_bond_atom_site_label_2
 _geom_bond_distance
 _geom_bond_site_symmetry_2
 _geom_bond_publ_flag
Zr1 O1 2.214(5) . ?
Zr1 O2 2.217(5) . ?
Zr1 N3 2.243(6) . ?
Zr1 N4 2.246(6) . ?
Zr1 C4 2.249(8) . ?
Zr1 C3 2.252(7) . ?
Zr1 N2 2.335(6) . ?
Zr1 N1 2.339(6) . ?
Zr1 C2 2.696(9) . ?
Zr1 C1 2.707(8) . ?
O1 C1 1.297(10) . ?
N3 C3 1.274(10) . ?
N3 C29 1.449(9) . ?
O2 C2 1.295(10) . ?
N4 C4 1.282(9) . ?
N4 C44 1.444(9) . ?
N2 C2 1.313(10) . ?
N2 C17 1.434(10) . ?
C29 C34 1.398(11) . ?
C29 C30 1.402(11) . ?
N1 C1 1.311(11) . ?
N1 C5 1.427(10) . ?
C4 C52 1.505(11) . ?
C45 C46 1.388(12) . ?
C45 C44 1.402(11) . ?
C45 C50 1.503(12) . ?
C52 C53 1.493(12) . ?
C41 C42 1.36(2) . ?
C41 C40 1.37(2) . ?
C44 C49 1.401(11) . ?
C49 C48 1.383(11) . ?
C49 C51 1.503(11) . ?
C17 C18 1.392(13) . ?
C17 C22 1.398(12) . ?
C40 C39 1.376(18) . ?
C3 C37 1.517(11) . ?
C30 C31 1.391(12) . ?
C30 C35 1.510(12) . ?
C53 C54 1.369(14) . ?
C53 C58 1.377(14) . ?
C48 C47 1.390(13) . ?
C36 C34 1.514(12) . ?
C22 C21 1.397(13) . ?
C22 C23 1.504(13) . ?
C9 C8 1.355(13) . ?
C9 C10 1.386(12) . ?
C10 C5 1.398(11) . ?
C10 C12 1.517(12) . ?
C43 C42 1.366(14) . ?
C43 C38 1.394(12) . ?
C39 C38 1.366(12) . ?
C31 C32 1.349(14) . ?
C5 C6 1.404(14) . ?
C34 C33 1.380(12) . ?
C37 C38 1.490(12) . ?
C21 C20 1.367(15) . ?
C46 C47 1.355(13) . ?
C2 C25 1.583(14) . ?
C20 C19 1.390(15) . ?
C18 C19 1.395(14) . ?
C18 C24 1.521(14) . ?
C54 C55 1.388(17) . ?
C1 C13 1.530(13) . ?
C33 C32 1.392(14) . ?
C8 C7 1.395(14) . ?
C11 C6 1.510(15) . ?
C6 C7 1.364(14) . ?
C55 C56 1.32(3) . ?
C58 C57 1.40(2) . ?
C56 C57 1.31(3) . ?
C28 C25 1.422(13) . ?
C26 C25 1.426(13) . ?
C27 C25 1.592(16) . ?
C15 C13 1.475(11) . ?
C16 C13 1.438(11) . ?
C14 C13 1.627(15) . ?
 
loop_
 _geom_angle_atom_site_label_1
 _geom_angle_atom_site_label_2
 _geom_angle_atom_site_label_3
 _geom_angle
 _geom_angle_site_symmetry_1
 _geom_angle_site_symmetry_3
 _geom_angle_publ_flag
O1 Zr1 O2 79.3(2) . . ?
O1 Zr1 N3 87.4(2) . . ?
O2 Zr1 N3 166.7(2) . . ?
O1 Zr1 N4 164.3(2) . . ?
O2 Zr1 N4 85.3(2) . . ?
N3 Zr1 N4 108.0(2) . . ?
O1 Zr1 C4 144.4(2) . . ?
O2 Zr1 C4 93.2(2) . . ?
N3 Zr1 C4 98.2(2) . . ?
N4 Zr1 C4 33.2(2) . . ?
O1 Zr1 C3 93.6(2) . . ?
O2 Zr1 C3 146.2(3) . . ?
N3 Zr1 C3 32.9(2) . . ?
N4 Zr1 C3 100.9(2) . . ?
C4 Zr1 C3 110.2(3) . . ?
O1 Zr1 N2 83.4(2) . . ?
O2 Zr1 N2 57.5(2) . . ?
N3 Zr1 N2 120.4(2) . . ?
N4 Zr1 N2 90.7(2) . . ?
C4 Zr1 N2 121.7(3) . . ?
C3 Zr1 N2 89.0(3) . . ?
O1 Zr1 N1 57.2(2) . . ?
O2 Zr1 N1 82.8(2) . . ?
N3 Zr1 N1 90.9(2) . . ?
N4 Zr1 N1 118.3(2) . . ?
C4 Zr1 N1 87.5(3) . . ?
C3 Zr1 N1 121.1(3) . . ?
N2 Zr1 N1 129.2(2) . . ?
O1 Zr1 C2 77.9(2) . . ?
O2 Zr1 C2 28.5(2) . . ?
N3 Zr1 C2 146.7(3) . . ?
N4 Zr1 C2 89.9(3) . . ?
C4 Zr1 C2 111.1(3) . . ?
C3 Zr1 C2 117.7(3) . . ?
N2 Zr1 C2 29.1(2) . . ?
N1 Zr1 C2 105.2(3) . . ?
O1 Zr1 C1 28.4(2) . . ?
O2 Zr1 C1 77.6(3) . . ?
N3 Zr1 C1 91.2(3) . . ?
N4 Zr1 C1 144.1(2) . . ?
C4 Zr1 C1 116.1(3) . . ?
C3 Zr1 C1 111.0(3) . . ?
N2 Zr1 C1 105.6(3) . . ?
N1 Zr1 C1 29.0(2) . . ?
C2 Zr1 C1 89.6(3) . . ?
C1 O1 Zr1 97.4(5) . . ?
C3 N3 C29 127.3(6) . . ?
C3 N3 Zr1 73.9(4) . . ?
C29 N3 Zr1 158.0(5) . . ?
C2 O2 Zr1 96.8(5) . . ?
C4 N4 C44 125.6(6) . . ?
C4 N4 Zr1 73.5(4) . . ?
C44 N4 Zr1 159.8(5) . . ?
C2 N2 C17 127.5(7) . . ?
C2 N2 Zr1 90.9(5) . . ?
C17 N2 Zr1 140.9(5) . . ?
C34 C29 C30 122.4(7) . . ?
C34 C29 N3 117.7(7) . . ?
C30 C29 N3 119.8(7) . . ?
C1 N1 C5 127.0(7) . . ?
C1 N1 Zr1 91.3(5) . . ?
C5 N1 Zr1 141.2(5) . . ?
N4 C4 C52 124.4(7) . . ?
N4 C4 Zr1 73.3(4) . . ?
C52 C4 Zr1 161.0(6) . . ?
C46 C45 C44 117.7(8) . . ?
C46 C45 C50 120.8(7) . . ?
C44 C45 C50 121.5(7) . . ?
C53 C52 C4 113.8(7) . . ?
C42 C41 C40 119.1(13) . . ?
C49 C44 C45 121.4(7) . . ?
C49 C44 N4 118.6(6) . . ?
C45 C44 N4 120.0(7) . . ?
C48 C49 C44 118.2(8) . . ?
C48 C49 C51 121.9(7) . . ?
C44 C49 C51 119.9(7) . . ?
C18 C17 C22 120.6(8) . . ?
C18 C17 N2 120.2(8) . . ?
C22 C17 N2 119.1(8) . . ?
C41 C40 C39 120.8(13) . . ?
N3 C3 C37 123.2(7) . . ?
N3 C3 Zr1 73.1(4) . . ?
C37 C3 Zr1 162.2(6) . . ?
C31 C30 C29 117.9(8) . . ?
C31 C30 C35 120.4(8) . . ?
C29 C30 C35 121.7(7) . . ?
C54 C53 C58 117.4(11) . . ?
C54 C53 C52 120.8(9) . . ?
C58 C53 C52 121.8(11) . . ?
C49 C48 C47 120.6(8) . . ?
C21 C22 C17 118.7(9) . . ?
C21 C22 C23 120.1(9) . . ?
C17 C22 C23 121.2(8) . . ?
C8 C9 C10 121.9(8) . . ?
C9 C10 C5 119.3(8) . . ?
C9 C10 C12 119.6(7) . . ?
C5 C10 C12 121.1(8) . . ?
C42 C43 C38 121.9(11) . . ?
C38 C39 C40 121.1(12) . . ?
C32 C31 C30 121.2(9) . . ?
C10 C5 C6 118.7(8) . . ?
C10 C5 N1 121.1(8) . . ?
C6 C5 N1 119.8(8) . . ?
C33 C34 C29 116.4(8) . . ?
C33 C34 C36 122.3(8) . . ?
C29 C34 C36 121.3(7) . . ?
C38 C37 C3 115.0(7) . . ?
C20 C21 C22 121.4(10) . . ?
C47 C46 C45 121.7(9) . . ?
O2 C2 N2 114.2(7) . . ?
O2 C2 C25 118.1(8) . . ?
N2 C2 C25 127.0(9) . . ?
O2 C2 Zr1 54.7(4) . . ?
N2 C2 Zr1 60.0(4) . . ?
C25 C2 Zr1 172.8(7) . . ?
C39 C38 C43 117.1(9) . . ?
C39 C38 C37 122.6(9) . . ?
C43 C38 C37 120.2(8) . . ?
C21 C20 C19 119.6(10) . . ?
C17 C18 C19 119.0(10) . . ?
C17 C18 C24 121.2(8) . . ?
C19 C18 C24 119.7(10) . . ?
C53 C54 C55 120.4(14) . . ?
O1 C1 N1 113.5(7) . . ?
O1 C1 C13 120.8(8) . . ?
N1 C1 C13 124.7(8) . . ?
O1 C1 Zr1 54.2(4) . . ?
N1 C1 Zr1 59.8(4) . . ?
C13 C1 Zr1 174.3(6) . . ?
C20 C19 C18 120.7(11) . . ?
C46 C47 C48 120.3(8) . . ?
C34 C33 C32 122.3(10) . . ?
C41 C42 C43 120.0(13) . . ?
C31 C32 C33 119.8(9) . . ?
C9 C8 C7 118.9(9) . . ?
C7 C6 C5 120.1(10) . . ?
C7 C6 C11 121.6(11) . . ?
C5 C6 C11 118.3(9) . . ?
C56 C55 C54 120.1(19) . . ?
C6 C7 C8 121.0(11) . . ?
C53 C58 C57 120.5(16) . . ?
C57 C56 C55 122(2) . . ?
C56 C57 C58 119(2) . . ?
C28 C25 C26 118.1(10) . . ?
C28 C25 C2 111.2(10) . . ?
C26 C25 C2 110.8(11) . . ?
C28 C25 C27 101.5(11) . . ?
C26 C25 C27 100.9(11) . . ?
C2 C25 C27 113.6(11) . . ?
C16 C13 C15 117.2(9) . . ?
C16 C13 C1 114.0(9) . . ?
C15 C13 C1 110.6(8) . . ?
C16 C13 C14 98.3(9) . . ?
C15 C13 C14 100.7(9) . . ?
C1 C13 C14 114.6(11) . . ?
 
loop_
 _geom_torsion_atom_site_label_1
 _geom_torsion_atom_site_label_2
 _geom_torsion_atom_site_label_3
 _geom_torsion_atom_site_label_4
 _geom_torsion
 _geom_torsion_site_symmetry_1
 _geom_torsion_site_symmetry_2
 _geom_torsion_site_symmetry_3
 _geom_torsion_site_symmetry_4
 _geom_torsion_publ_flag
O2 Zr1 O1 C1 83.6(5) . . . . ?
N3 Zr1 O1 C1 -97.4(5) . . . . ?
N4 Zr1 O1 C1 73.0(10) . . . . ?
C4 Zr1 O1 C1 3.2(7) . . . . ?
C3 Zr1 O1 C1 -129.8(5) . . . . ?
N2 Zr1 O1 C1 141.6(5) . . . . ?
N1 Zr1 O1 C1 -4.6(5) . . . . ?
C2 Zr1 O1 C1 112.6(6) . . . . ?
O1 Zr1 N3 C3 -100.6(5) . . . . ?
O2 Zr1 N3 C3 -96.4(10) . . . . ?
N4 Zr1 N3 C3 82.1(5) . . . . ?
C4 Zr1 N3 C3 114.7(5) . . . . ?
N2 Zr1 N3 C3 -19.7(5) . . . . ?
N1 Zr1 N3 C3 -157.6(5) . . . . ?
C2 Zr1 N3 C3 -37.5(7) . . . . ?
C1 Zr1 N3 C3 -128.7(5) . . . . ?
O1 Zr1 N3 C29 66.0(13) . . . . ?
O2 Zr1 N3 C29 70.2(17) . . . . ?
N4 Zr1 N3 C29 -111.3(13) . . . . ?
C4 Zr1 N3 C29 -78.7(13) . . . . ?
C3 Zr1 N3 C29 166.6(15) . . . . ?
N2 Zr1 N3 C29 146.9(13) . . . . ?
N1 Zr1 N3 C29 9.0(13) . . . . ?
C2 Zr1 N3 C29 129.1(13) . . . . ?
C1 Zr1 N3 C29 37.9(13) . . . . ?
O1 Zr1 O2 C2 84.1(5) . . . . ?
N3 Zr1 O2 C2 79.9(11) . . . . ?
N4 Zr1 O2 C2 -98.7(5) . . . . ?
C4 Zr1 O2 C2 -130.9(5) . . . . ?
C3 Zr1 O2 C2 3.8(7) . . . . ?
N2 Zr1 O2 C2 -4.8(5) . . . . ?
N1 Zr1 O2 C2 142.0(5) . . . . ?
C1 Zr1 O2 C2 113.0(5) . . . . ?
O1 Zr1 N4 C4 -92.8(9) . . . . ?
O2 Zr1 N4 C4 -103.2(4) . . . . ?
N3 Zr1 N4 C4 77.1(4) . . . . ?
C3 Zr1 N4 C4 110.4(5) . . . . ?
N2 Zr1 N4 C4 -160.5(4) . . . . ?
N1 Zr1 N4 C4 -24.1(5) . . . . ?
C2 Zr1 N4 C4 -131.3(4) . . . . ?
C1 Zr1 N4 C4 -42.1(7) . . . . ?
O1 Zr1 N4 C44 70.2(17) . . . . ?
O2 Zr1 N4 C44 59.8(14) . . . . ?
N3 Zr1 N4 C44 -119.9(13) . . . . ?
C4 Zr1 N4 C44 163.0(16) . . . . ?
C3 Zr1 N4 C44 -86.6(14) . . . . ?
N2 Zr1 N4 C44 2.5(14) . . . . ?
N1 Zr1 N4 C44 138.9(13) . . . . ?
C2 Zr1 N4 C44 31.6(14) . . . . ?
C1 Zr1 N4 C44 120.9(13) . . . . ?
O1 Zr1 N2 C2 -76.8(5) . . . . ?
O2 Zr1 N2 C2 4.7(5) . . . . ?
N3 Zr1 N2 C2 -159.9(5) . . . . ?
N4 Zr1 N2 C2 88.7(5) . . . . ?
C4 Zr1 N2 C2 76.2(6) . . . . ?
C3 Zr1 N2 C2 -170.5(5) . . . . ?
N1 Zr1 N2 C2 -39.8(6) . . . . ?
C1 Zr1 N2 C2 -59.0(5) . . . . ?
O1 Zr1 N2 C17 93.6(9) . . . . ?
O2 Zr1 N2 C17 175.1(9) . . . . ?
N3 Zr1 N2 C17 10.5(9) . . . . ?
N4 Zr1 N2 C17 -100.9(9) . . . . ?
C4 Zr1 N2 C17 -113.4(9) . . . . ?
C3 Zr1 N2 C17 -0.1(9) . . . . ?
N1 Zr1 N2 C17 130.6(8) . . . . ?
C2 Zr1 N2 C17 170.4(12) . . . . ?
C1 Zr1 N2 C17 111.5(9) . . . . ?
C3 N3 C29 C34 -96.3(10) . . . . ?
Zr1 N3 C29 C34 99.9(14) . . . . ?
C3 N3 C29 C30 87.8(10) . . . . ?
Zr1 N3 C29 C30 -75.9(15) . . . . ?
O1 Zr1 N1 C1 4.6(5) . . . . ?
O2 Zr1 N1 C1 -77.4(5) . . . . ?
N3 Zr1 N1 C1 90.9(5) . . . . ?
N4 Zr1 N1 C1 -158.0(5) . . . . ?
C4 Zr1 N1 C1 -170.9(5) . . . . ?
C3 Zr1 N1 C1 76.9(6) . . . . ?
N2 Zr1 N1 C1 -40.9(6) . . . . ?
C2 Zr1 N1 C1 -59.7(6) . . . . ?
O1 Zr1 N1 C5 176.0(9) . . . . ?
O2 Zr1 N1 C5 94.0(9) . . . . ?
N3 Zr1 N1 C5 -97.7(9) . . . . ?
N4 Zr1 N1 C5 13.4(9) . . . . ?
C4 Zr1 N1 C5 0.5(9) . . . . ?
C3 Zr1 N1 C5 -111.7(9) . . . . ?
N2 Zr1 N1 C5 130.5(8) . . . . ?
C2 Zr1 N1 C5 111.7(9) . . . . ?
C1 Zr1 N1 C5 171.4(12) . . . . ?
C44 N4 C4 C52 -0.6(12) . . . . ?
Zr1 N4 C4 C52 172.2(8) . . . . ?
C44 N4 C4 Zr1 -172.9(7) . . . . ?
O1 Zr1 C4 N4 152.4(4) . . . . ?
O2 Zr1 C4 N4 76.3(4) . . . . ?
N3 Zr1 C4 N4 -110.5(4) . . . . ?
C3 Zr1 C4 N4 -78.7(5) . . . . ?
N2 Zr1 C4 N4 23.1(5) . . . . ?
N1 Zr1 C4 N4 158.9(4) . . . . ?
C2 Zr1 C4 N4 53.6(5) . . . . ?
C1 Zr1 C4 N4 154.1(4) . . . . ?
O1 Zr1 C4 C52 -7.6(19) . . . . ?
O2 Zr1 C4 C52 -83.7(17) . . . . ?
N3 Zr1 C4 C52 89.5(17) . . . . ?
N4 Zr1 C4 C52 -160.0(19) . . . . ?
C3 Zr1 C4 C52 121.3(17) . . . . ?
N2 Zr1 C4 C52 -136.9(16) . . . . ?
N1 Zr1 C4 C52 -1.1(17) . . . . ?
C2 Zr1 C4 C52 -106.4(17) . . . . ?
C1 Zr1 C4 C52 -5.9(18) . . . . ?
N4 C4 C52 C53 116.2(9) . . . . ?
Zr1 C4 C52 C53 -87.3(18) . . . . ?
C46 C45 C44 C49 1.6(12) . . . . ?
C50 C45 C44 C49 179.8(8) . . . . ?
C46 C45 C44 N4 -178.8(7) . . . . ?
C50 C45 C44 N4 -0.7(12) . . . . ?
C4 N4 C44 C49 -102.7(9) . . . . ?
Zr1 N4 C44 C49 97.5(14) . . . . ?
C4 N4 C44 C45 77.7(10) . . . . ?
Zr1 N4 C44 C45 -82.1(15) . . . . ?
C45 C44 C49 C48 -1.8(12) . . . . ?
N4 C44 C49 C48 178.6(7) . . . . ?
C45 C44 C49 C51 178.4(8) . . . . ?
N4 C44 C49 C51 -1.2(11) . . . . ?
C2 N2 C17 C18 93.7(11) . . . . ?
Zr1 N2 C17 C18 -74.2(11) . . . . ?
C2 N2 C17 C22 -90.3(11) . . . . ?
Zr1 N2 C17 C22 101.8(10) . . . . ?
C42 C41 C40 C39 1(2) . . . . ?
C29 N3 C3 C37 -1.6(12) . . . . ?
Zr1 N3 C3 C37 172.2(8) . . . . ?
C29 N3 C3 Zr1 -173.7(7) . . . . ?
O1 Zr1 C3 N3 79.7(4) . . . . ?
O2 Zr1 C3 N3 155.8(4) . . . . ?
N4 Zr1 C3 N3 -106.4(4) . . . . ?
C4 Zr1 C3 N3 -73.3(5) . . . . ?
N2 Zr1 C3 N3 163.1(4) . . . . ?
N1 Zr1 C3 N3 26.4(5) . . . . ?
C2 Zr1 C3 N3 157.8(4) . . . . ?
C1 Zr1 C3 N3 56.7(5) . . . . ?
O1 Zr1 C3 C37 -78.4(19) . . . . ?
O2 Zr1 C3 C37 -2(2) . . . . ?
N3 Zr1 C3 C37 -158(2) . . . . ?
N4 Zr1 C3 C37 95.5(19) . . . . ?
C4 Zr1 C3 C37 128.6(19) . . . . ?
N2 Zr1 C3 C37 5.0(19) . . . . ?
N1 Zr1 C3 C37 -131.7(19) . . . . ?
C2 Zr1 C3 C37 0(2) . . . . ?
C1 Zr1 C3 C37 -101.4(19) . . . . ?
C34 C29 C30 C31 -1.7(12) . . . . ?
N3 C29 C30 C31 174.0(7) . . . . ?
C34 C29 C30 C35 175.8(8) . . . . ?
N3 C29 C30 C35 -8.5(12) . . . . ?
C4 C52 C53 C54 -91.7(10) . . . . ?
C4 C52 C53 C58 88.1(10) . . . . ?
C44 C49 C48 C47 0.6(13) . . . . ?
C51 C49 C48 C47 -179.6(8) . . . . ?
C18 C17 C22 C21 -4.4(13) . . . . ?
N2 C17 C22 C21 179.7(7) . . . . ?
C18 C17 C22 C23 174.0(9) . . . . ?
N2 C17 C22 C23 -2.0(13) . . . . ?
C8 C9 C10 C5 -2.6(13) . . . . ?
C8 C9 C10 C12 177.9(9) . . . . ?
C41 C40 C39 C38 -1.1(18) . . . . ?
C29 C30 C31 C32 1.4(14) . . . . ?
C35 C30 C31 C32 -176.1(9) . . . . ?
C9 C10 C5 C6 5.0(13) . . . . ?
C12 C10 C5 C6 -175.6(10) . . . . ?
C9 C10 C5 N1 177.2(7) . . . . ?
C12 C10 C5 N1 -3.3(12) . . . . ?
C1 N1 C5 C10 93.5(10) . . . . ?
Zr1 N1 C5 C10 -75.7(12) . . . . ?
C1 N1 C5 C6 -94.3(12) . . . . ?
Zr1 N1 C5 C6 96.4(11) . . . . ?
C30 C29 C34 C33 0.2(13) . . . . ?
N3 C29 C34 C33 -175.6(8) . . . . ?
C30 C29 C34 C36 179.9(8) . . . . ?
N3 C29 C34 C36 4.1(12) . . . . ?
N3 C3 C37 C38 119.6(9) . . . . ?
Zr1 C3 C37 C38 -86(2) . . . . ?
C17 C22 C21 C20 2.2(14) . . . . ?
C23 C22 C21 C20 -176.2(10) . . . . ?
C44 C45 C46 C47 -0.2(14) . . . . ?
C50 C45 C46 C47 -178.4(9) . . . . ?
Zr1 O2 C2 N2 8.0(8) . . . . ?
Zr1 O2 C2 C25 179.3(8) . . . . ?
C17 N2 C2 O2 -179.9(8) . . . . ?
Zr1 N2 C2 O2 -7.5(8) . . . . ?
C17 N2 C2 C25 9.7(15) . . . . ?
Zr1 N2 C2 C25 -177.9(10) . . . . ?
C17 N2 C2 Zr1 -172.4(9) . . . . ?
O1 Zr1 C2 O2 -90.0(5) . . . . ?
N3 Zr1 C2 O2 -155.7(4) . . . . ?
N4 Zr1 C2 O2 80.1(5) . . . . ?
C4 Zr1 C2 O2 54.0(5) . . . . ?
C3 Zr1 C2 O2 -177.6(5) . . . . ?
N2 Zr1 C2 O2 171.6(8) . . . . ?
N1 Zr1 C2 O2 -39.3(5) . . . . ?
C1 Zr1 C2 O2 -64.0(5) . . . . ?
O1 Zr1 C2 N2 98.4(5) . . . . ?
O2 Zr1 C2 N2 -171.6(8) . . . . ?
N3 Zr1 C2 N2 32.7(8) . . . . ?
N4 Zr1 C2 N2 -91.5(5) . . . . ?
C4 Zr1 C2 N2 -117.6(5) . . . . ?
C3 Zr1 C2 N2 10.8(6) . . . . ?
N1 Zr1 C2 N2 149.1(5) . . . . ?
C1 Zr1 C2 N2 124.4(5) . . . . ?
O1 Zr1 C2 C25 -95(6) . . . . ?
O2 Zr1 C2 C25 -5(6) . . . . ?
N3 Zr1 C2 C25 -161(6) . . . . ?
N4 Zr1 C2 C25 75(6) . . . . ?
C4 Zr1 C2 C25 49(6) . . . . ?
C3 Zr1 C2 C25 177(6) . . . . ?
N2 Zr1 C2 C25 166(7) . . . . ?
N1 Zr1 C2 C25 -45(6) . . . . ?
C1 Zr1 C2 C25 -69(6) . . . . ?
C40 C39 C38 C43 1.3(13) . . . . ?
C40 C39 C38 C37 -176.2(9) . . . . ?
C42 C43 C38 C39 -1.2(13) . . . . ?
C42 C43 C38 C37 176.4(9) . . . . ?
C3 C37 C38 C39 -95.1(10) . . . . ?
C3 C37 C38 C43 87.4(10) . . . . ?
C22 C21 C20 C19 1.2(16) . . . . ?
C22 C17 C18 C19 3.1(14) . . . . ?
N2 C17 C18 C19 179.0(8) . . . . ?
C22 C17 C18 C24 -175.2(9) . . . . ?
N2 C17 C18 C24 0.6(14) . . . . ?
C58 C53 C54 C55 0.7(14) . . . . ?
C52 C53 C54 C55 -179.5(9) . . . . ?
Zr1 O1 C1 N1 7.6(8) . . . . ?
Zr1 O1 C1 C13 176.8(9) . . . . ?
C5 N1 C1 O1 179.6(7) . . . . ?
Zr1 N1 C1 O1 -7.1(8) . . . . ?
C5 N1 C1 C13 10.9(15) . . . . ?
Zr1 N1 C1 C13 -175.8(10) . . . . ?
C5 N1 C1 Zr1 -173.3(9) . . . . ?
O2 Zr1 C1 O1 -90.5(5) . . . . ?
N3 Zr1 C1 O1 82.2(5) . . . . ?
N4 Zr1 C1 O1 -153.9(4) . . . . ?
C4 Zr1 C1 O1 -178.0(5) . . . . ?
C3 Zr1 C1 O1 55.2(6) . . . . ?
N2 Zr1 C1 O1 -39.8(5) . . . . ?
N1 Zr1 C1 O1 171.9(9) . . . . ?
C2 Zr1 C1 O1 -64.5(5) . . . . ?
O1 Zr1 C1 N1 -171.9(9) . . . . ?
O2 Zr1 C1 N1 97.5(5) . . . . ?
N3 Zr1 C1 N1 -89.7(5) . . . . ?
N4 Zr1 C1 N1 34.2(8) . . . . ?
C4 Zr1 C1 N1 10.1(6) . . . . ?
C3 Zr1 C1 N1 -116.7(5) . . . . ?
N2 Zr1 C1 N1 148.2(5) . . . . ?
C2 Zr1 C1 N1 123.6(5) . . . . ?
O1 Zr1 C1 C13 -29(8) . . . . ?
O2 Zr1 C1 C13 -120(9) . . . . ?
N3 Zr1 C1 C13 53(9) . . . . ?
N4 Zr1 C1 C13 177(8) . . . . ?
C4 Zr1 C1 C13 153(9) . . . . ?
C3 Zr1 C1 C13 26(9) . . . . ?
N2 Zr1 C1 C13 -69(9) . . . . ?
N1 Zr1 C1 C13 143(9) . . . . ?
C2 Zr1 C1 C13 -94(9) . . . . ?
C21 C20 C19 C18 -2.5(17) . . . . ?
C17 C18 C19 C20 0.3(16) . . . . ?
C24 C18 C19 C20 178.7(10) . . . . ?
C45 C46 C47 C48 -1.0(15) . . . . ?
C49 C48 C47 C46 0.8(14) . . . . ?
C29 C34 C33 C32 1.6(16) . . . . ?
C36 C34 C33 C32 -178.1(10) . . . . ?
C40 C41 C42 C43 -1(2) . . . . ?
C38 C43 C42 C41 0.9(17) . . . . ?
C30 C31 C32 C33 0.3(16) . . . . ?
C34 C33 C32 C31 -1.9(18) . . . . ?
C10 C9 C8 C7 -0.4(15) . . . . ?
C10 C5 C6 C7 -4.4(17) . . . . ?
N1 C5 C6 C7 -176.7(11) . . . . ?
C10 C5 C6 C11 175.3(14) . . . . ?
N1 C5 C6 C11 3.0(19) . . . . ?
C53 C54 C55 C56 -2(2) . . . . ?
C5 C6 C7 C8 1(2) . . . . ?
C11 C6 C7 C8 -178.3(16) . . . . ?
C9 C8 C7 C6 1.0(19) . . . . ?
C54 C53 C58 C57 0.2(15) . . . . ?
C52 C53 C58 C57 -179.6(11) . . . . ?
C54 C55 C56 C57 2(3) . . . . ?
C55 C56 C57 C58 -1(3) . . . . ?
C53 C58 C57 C56 0(3) . . . . ?
O2 C2 C25 C28 -4.9(15) . . . . ?
N2 C2 C25 C28 165.2(11) . . . . ?
Zr1 C2 C25 C28 0(7) . . . . ?
O2 C2 C25 C26 128.6(11) . . . . ?
N2 C2 C25 C26 -61.3(15) . . . . ?
Zr1 C2 C25 C26 133(6) . . . . ?
O2 C2 C25 C27 -118.6(12) . . . . ?
N2 C2 C25 C27 51.4(15) . . . . ?
Zr1 C2 C25 C27 -114(6) . . . . ?
O1 C1 C13 C16 130.2(10) . . . . ?
N1 C1 C13 C16 -61.9(16) . . . . ?
Zr1 C1 C13 C16 158(8) . . . . ?
O1 C1 C13 C15 -4.5(15) . . . . ?
N1 C1 C13 C15 163.4(9) . . . . ?
Zr1 C1 C13 C15 23(9) . . . . ?
O1 C1 C13 C14 -117.5(11) . . . . ?
N1 C1 C13 C14 50.4(14) . . . . ?
Zr1 C1 C13 C14 -90(9) . . . . ?
 
_diffrn_measured_fraction_theta_max    0.985
_diffrn_reflns_theta_full              22.65
_diffrn_measured_fraction_theta_full   0.985
_refine_diff_density_max    2.377
_refine_diff_density_min   -1.216
_refine_diff_density_rms    0.145

#===END

 
data_ls102mon
 
_audit_creation_method            SHELXL-97
_chemical_name_systematic
;
 ?
;
_chemical_name_common             ?
_chemical_melting_point           ?
_chemical_formula_moiety          'C58 H68 N4 O2 Zr'
_chemical_formula_sum
 'C58 H68 N4 O2 Zr'
_chemical_formula_weight          944.38
 
loop_
 _atom_type_symbol
 _atom_type_description
 _atom_type_scat_dispersion_real
 _atom_type_scat_dispersion_imag
 _atom_type_scat_source
 'C'  'C'   0.0033   0.0016
 'International Tables Vol C Tables 4.2.6.8 and 6.1.1.4'
 'H'  'H'   0.0000   0.0000
 'International Tables Vol C Tables 4.2.6.8 and 6.1.1.4'
 'N'  'N'   0.0061   0.0033
 'International Tables Vol C Tables 4.2.6.8 and 6.1.1.4'
 'O'  'O'   0.0106   0.0060
 'International Tables Vol C Tables 4.2.6.8 and 6.1.1.4'
 'Zr'  'Zr'  -2.9673   0.5597
 'International Tables Vol C Tables 4.2.6.8 and 6.1.1.4'
 
_symmetry_cell_setting            Monoclinic
_symmetry_space_group_name_H-M    'P21/n'
 
loop_
 _symmetry_equiv_pos_as_xyz
 'x, y, z'
 '-x+1/2, y+1/2, -z+1/2'
 '-x, -y, -z'
 'x-1/2, -y-1/2, z-1/2'
 
_cell_length_a                    13.036(4)
_cell_length_b                    22.774(7)
_cell_length_c                    16.957(5)
_cell_angle_alpha                 90.00
_cell_angle_beta                  94.825(10)
_cell_angle_gamma                 90.00
_cell_volume                      5016(3)
_cell_formula_units_Z             4
_cell_measurement_temperature     293(2)
_cell_measurement_reflns_used     ?
_cell_measurement_theta_min       2.27
_cell_measurement_theta_max       30.27
 
_exptl_crystal_description        Block
_exptl_crystal_colour             Orange
_exptl_crystal_size_max           0.35
_exptl_crystal_size_mid           0.32
_exptl_crystal_size_min           0.25
_exptl_crystal_density_meas       ?
_exptl_crystal_density_diffrn     1.250
_exptl_crystal_density_method     'not measured'
_exptl_crystal_F_000              2000
_exptl_absorpt_coefficient_mu     0.265
_exptl_absorpt_correction_type    'Multi-scan'
_exptl_absorpt_correction_T_min   ?
_exptl_absorpt_correction_T_max   ?
_exptl_absorpt_process_details    ?
 
_exptl_special_details
;
 ?
;
 
_diffrn_ambient_temperature       173(2)
_diffrn_radiation_wavelength      0.71073
_diffrn_radiation_type            MoK\a
_diffrn_radiation_source          'fine-focus sealed tube'
_diffrn_radiation_monochromator   graphite
_diffrn_measurement_device_type   'Bruker X8'
_diffrn_measurement_method        ?
_diffrn_detector_area_resol_mean  ?
_diffrn_standards_number          ?
_diffrn_standards_interval_count  ?
_diffrn_standards_interval_time   ?
_diffrn_standards_decay_%         ?
_diffrn_reflns_number             64748
_diffrn_reflns_av_R_equivalents   0.0609
_diffrn_reflns_av_sigmaI/netI     0.0645
_diffrn_reflns_limit_h_min        -18
_diffrn_reflns_limit_h_max        18
_diffrn_reflns_limit_k_min        -31
_diffrn_reflns_limit_k_max        31
_diffrn_reflns_limit_l_min        -23
_diffrn_reflns_limit_l_max        23
_diffrn_reflns_theta_min          1.50
_diffrn_reflns_theta_max          30.27
_reflns_number_total              14747
_reflns_number_gt                 9945
_reflns_threshold_expression      >2sigma(I)
 
_computing_data_collection        ?
_computing_cell_refinement        CrystalClear
_computing_data_reduction         CrystalClear
_computing_structure_solution     SIR-97
_computing_structure_refinement   'SHELXL-97 (Sheldrick, 1997)'
_computing_molecular_graphics     'ORTEP-3 (Farrugia, 1997)'
_computing_publication_material   'PLATON (Spek, 1990)'
 
_refine_special_details
;
 Refinement of F^2^ against ALL reflections.  The weighted R-factor wR and
 goodness of fit S are based on F^2^, conventional R-factors R are based
 on F, with F set to zero for negative F^2^. The threshold expression of
 F^2^ > 2sigma(F^2^) is used only for calculating R-factors(gt) etc. and is
 not relevant to the choice of reflections for refinement.  R-factors based
 on F^2^ are statistically about twice as large as those based on F, and R-
 factors based on ALL data will be even larger.
;
 
_refine_ls_structure_factor_coef  Fsqd
_refine_ls_matrix_type            full
_refine_ls_weighting_scheme       calc
_refine_ls_weighting_details
 'calc w=1/[\s^2^(Fo^2^)+(0.0814P)^2^+1.8566P] where P=(Fo^2^+2Fc^2^)/3'
_atom_sites_solution_primary      direct
_atom_sites_solution_secondary    difmap
_atom_sites_solution_hydrogens    geom
_refine_ls_hydrogen_treatment     mixed
_refine_ls_extinction_method      none
_refine_ls_extinction_coef        ?
_refine_ls_number_reflns          14747
_refine_ls_number_parameters      586
_refine_ls_number_restraints      0
_refine_ls_R_factor_all           0.0888
_refine_ls_R_factor_gt            0.0485
_refine_ls_wR_factor_ref          0.1549
_refine_ls_wR_factor_gt           0.1285
_refine_ls_goodness_of_fit_ref    1.033
_refine_ls_restrained_S_all       1.033
_refine_ls_shift/su_max           0.002
_refine_ls_shift/su_mean          0.000
 
loop_
 _atom_site_label
 _atom_site_type_symbol
 _atom_site_fract_x
 _atom_site_fract_y
 _atom_site_fract_z
 _atom_site_U_iso_or_equiv
 _atom_site_adp_type
 _atom_site_occupancy
 _atom_site_symmetry_multiplicity
 _atom_site_calc_flag
 _atom_site_refinement_flags
 _atom_site_disorder_assembly
 _atom_site_disorder_group
Zr1 Zr 0.299060(17) -0.113518(10) 0.737130(12) 0.01848(7) Uani 1 1 d . . .
N2 N 0.47503(16) -0.12476(9) 0.77586(11) 0.0232(4) Uani 1 1 d . . .
O1 O 0.14214(14) -0.12899(8) 0.75798(10) 0.0272(4) Uani 1 1 d . . .
O2 O 0.38582(14) -0.18938(8) 0.70407(10) 0.0274(4) Uani 1 1 d . . .
N1 N 0.24436(17) -0.17202(10) 0.84890(12) 0.0264(5) Uani 1 1 d . . .
N4 N 0.32066(15) -0.02351(9) 0.73628(11) 0.0196(4) Uani 1 1 d . . .
C28 C 0.21079(18) -0.05444(11) 0.62319(12) 0.0193(5) Uani 1 1 d . . .
C27 C 0.23287(18) -0.01428(11) 0.68325(12) 0.0198(5) Uani 1 1 d . . .
N3 N 0.27556(15) -0.10340(9) 0.61787(11) 0.0197(4) Uani 1 1 d . . .
C29 C 0.37599(18) 0.02458(11) 0.77133(13) 0.0217(5) Uani 1 1 d . . .
C1 C 0.1510(2) -0.16597(12) 0.81721(14) 0.0260(5) Uani 1 1 d . . .
C19 C 0.56115(19) -0.09581(12) 0.81539(14) 0.0246(5) Uani 1 1 d . . .
C30 C 0.4099(2) 0.07172(12) 0.72656(15) 0.0263(5) Uani 1 1 d . . .
C53 C 0.12397(19) -0.02522(13) 0.48960(14) 0.0273(6) Uani 1 1 d . . .
C46 C 0.1318(2) 0.04439(12) 0.78135(14) 0.0260(5) Uani 1 1 d . . .
C37 C 0.27993(18) -0.13433(12) 0.54522(13) 0.0230(5) Uani 1 1 d . . .
C38 C 0.33464(19) -0.10904(12) 0.48590(14) 0.0248(5) Uani 1 1 d . . .
C7 C 0.2769(2) -0.20735(13) 0.91597(15) 0.0335(6) Uani 1 1 d . . .
C3 C 0.0496(2) -0.19469(13) 0.83618(16) 0.0325(6) Uani 1 1 d . . .
C34 C 0.40027(19) 0.02349(12) 0.85353(14) 0.0255(5) Uani 1 1 d . . .
C20 C 0.5918(2) -0.11268(13) 0.89330(15) 0.0282(5) Uani 1 1 d . . .
C2 C 0.4765(2) -0.17128(12) 0.73050(14) 0.0263(5) Uani 1 1 d . . .
C52 C 0.11170(19) -0.05354(12) 0.56910(13) 0.0243(5) Uani 1 1 d . . .
H52A H 0.0877 -0.0935 0.5606 0.029 Uiso 1 1 calc R . .
H52B H 0.0595 -0.0324 0.5952 0.029 Uiso 1 1 calc R . .
C43 C 0.3897(2) -0.05153(13) 0.49964(15) 0.0301(6) Uani 1 1 d . . .
H43A H 0.3803 -0.0377 0.5520 0.045 Uiso 1 1 calc R . .
H43B H 0.3622 -0.0233 0.4615 0.045 Uiso 1 1 calc R . .
H43C H 0.4618 -0.0569 0.4942 0.045 Uiso 1 1 calc R . .
C45 C 0.16505(19) 0.03776(12) 0.69861(13) 0.0238(5) Uani 1 1 d . . .
H45A H 0.2014 0.0732 0.6857 0.029 Uiso 1 1 calc R . .
H45B H 0.1036 0.0353 0.6623 0.029 Uiso 1 1 calc R . .
C15 C 0.5659(2) -0.20594(14) 0.70123(17) 0.0382(7) Uani 1 1 d . . .
C58 C 0.1530(2) 0.03303(14) 0.48474(15) 0.0326(6) Uani 1 1 d . . .
H58 H 0.1646 0.0549 0.5310 0.039 Uiso 1 1 calc R . .
C42 C 0.2330(2) -0.18889(13) 0.53380(15) 0.0302(6) Uani 1 1 d . . .
C55 C 0.1203(2) -0.03027(18) 0.34754(16) 0.0459(9) Uani 1 1 d . . .
H55 H 0.1089 -0.0518 0.3010 0.055 Uiso 1 1 calc R . .
C10 C 0.3574(3) -0.2711(2) 1.0457(2) 0.0726(14) Uani 1 1 d . . .
H10 H 0.3863 -0.2921 1.0891 0.087 Uiso 1 1 calc R . .
C39 C 0.3369(2) -0.13842(14) 0.41441(15) 0.0327(6) Uani 1 1 d . . .
H39 H 0.3718 -0.1218 0.3743 0.039 Uiso 1 1 calc R . .
C12 C 0.3180(3) -0.26239(15) 0.90422(19) 0.0441(8) Uani 1 1 d . . .
C36 C 0.3590(2) -0.02443(13) 0.90301(14) 0.0293(6) Uani 1 1 d . . .
H36A H 0.3215 -0.0522 0.8692 0.044 Uiso 1 1 calc R . .
H36B H 0.3140 -0.0077 0.9390 0.044 Uiso 1 1 calc R . .
H36C H 0.4152 -0.0439 0.9325 0.044 Uiso 1 1 calc R . .
C8 C 0.2732(3) -0.18387(16) 0.99246(17) 0.0444(8) Uani 1 1 d . . .
C25 C 0.5374(2) -0.16171(14) 0.93185(16) 0.0346(6) Uani 1 1 d . . .
H25A H 0.4835 -0.1768 0.8954 0.052 Uiso 1 1 calc R . .
H25B H 0.5082 -0.1472 0.9782 0.052 Uiso 1 1 calc R . .
H25C H 0.5855 -0.1925 0.9466 0.052 Uiso 1 1 calc R . .
C51 C 0.0668(2) 0.00435(15) 0.81107(17) 0.0390(7) Uani 1 1 d . . .
H51 H 0.0480 -0.0292 0.7822 0.047 Uiso 1 1 calc R . .
C24 C 0.6100(2) -0.05007(13) 0.77967(15) 0.0285(6) Uani 1 1 d . . .
C6 C 0.0007(2) -0.22018(16) 0.75837(18) 0.0435(8) Uani 1 1 d . . .
H6A H 0.0440 -0.2506 0.7404 0.065 Uiso 1 1 calc R . .
H6B H -0.0071 -0.1897 0.7192 0.065 Uiso 1 1 calc R . .
H6C H -0.0657 -0.2363 0.7667 0.065 Uiso 1 1 calc R . .
C18 C 0.6729(2) -0.18847(16) 0.73576(18) 0.0429(8) Uani 1 1 d . . .
H18A H 0.7232 -0.2127 0.7134 0.064 Uiso 1 1 calc R . .
H18B H 0.6777 -0.1936 0.7921 0.064 Uiso 1 1 calc R . .
H18C H 0.6852 -0.1481 0.7235 0.064 Uiso 1 1 calc R . .
C54 C 0.1079(2) -0.05737(15) 0.42026(15) 0.0365(7) Uani 1 1 d . . .
H54 H 0.0891 -0.0967 0.4220 0.044 Uiso 1 1 calc R . .
C26 C 0.5811(2) -0.03318(14) 0.69534(16) 0.0357(7) Uani 1 1 d . . .
H26A H 0.6229 -0.0007 0.6812 0.054 Uiso 1 1 calc R . .
H26B H 0.5099 -0.0220 0.6893 0.054 Uiso 1 1 calc R . .
H26C H 0.5921 -0.0660 0.6615 0.054 Uiso 1 1 calc R . .
C44 C 0.1752(2) -0.21776(14) 0.59630(17) 0.0399(7) Uani 1 1 d . . .
H44A H 0.1780 -0.1932 0.6425 0.060 Uiso 1 1 calc R . .
H44B H 0.2059 -0.2551 0.6099 0.060 Uiso 1 1 calc R . .
H44C H 0.1047 -0.2234 0.5765 0.060 Uiso 1 1 calc R . .
C21 C 0.6734(2) -0.08334(15) 0.93400(16) 0.0384(7) Uani 1 1 d . . .
H21 H 0.6955 -0.0947 0.9853 0.046 Uiso 1 1 calc R . .
C57 C 0.1652(2) 0.05948(16) 0.41259(17) 0.0422(8) Uani 1 1 d . . .
H57 H 0.1842 0.0988 0.4105 0.051 Uiso 1 1 calc R . .
C31 C 0.4667(3) 0.11618(14) 0.76513(19) 0.0398(7) Uani 1 1 d . . .
H31 H 0.4890 0.1476 0.7359 0.048 Uiso 1 1 calc R . .
C47 C 0.1624(3) 0.09330(15) 0.82609(17) 0.0387(7) Uani 1 1 d . . .
H47 H 0.2088 0.1199 0.8075 0.046 Uiso 1 1 calc R . .
C33 C 0.4578(2) 0.06876(14) 0.88947(17) 0.0371(7) Uani 1 1 d . . .
H33 H 0.4741 0.0679 0.9439 0.045 Uiso 1 1 calc R . .
C41 C 0.2384(2) -0.21693(15) 0.46114(18) 0.0411(7) Uani 1 1 d . . .
H41 H 0.2073 -0.2534 0.4527 0.049 Uiso 1 1 calc R . .
C40 C 0.2889(2) -0.19153(15) 0.40168(17) 0.0418(8) Uani 1 1 d . . .
H40 H 0.2903 -0.2103 0.3531 0.050 Uiso 1 1 calc R . .
C35 C 0.3909(2) 0.07506(13) 0.63815(15) 0.0316(6) Uani 1 1 d . . .
H35A H 0.3513 0.0417 0.6192 0.047 Uiso 1 1 calc R . .
H35B H 0.4556 0.0753 0.6149 0.047 Uiso 1 1 calc R . .
H35C H 0.3538 0.1104 0.6238 0.047 Uiso 1 1 calc R . .
C56 C 0.1488(3) 0.02723(19) 0.34385(17) 0.0485(9) Uani 1 1 d . . .
H56 H 0.1572 0.0446 0.2952 0.058 Uiso 1 1 calc R . .
C23 C 0.6903(2) -0.02085(15) 0.82317(17) 0.0372(7) Uani 1 1 d . . .
H23 H 0.7228 0.0104 0.8003 0.045 Uiso 1 1 calc R . .
C14 C 0.3142(3) -0.28980(15) 0.8241(2) 0.0557(10) Uani 1 1 d . . .
H14A H 0.3466 -0.3277 0.8280 0.083 Uiso 1 1 calc R . .
H14B H 0.3498 -0.2652 0.7894 0.083 Uiso 1 1 calc R . .
H14C H 0.2438 -0.2942 0.8035 0.083 Uiso 1 1 calc R . .
C9 C 0.3134(3) -0.2173(2) 1.05615(19) 0.0591(12) Uani 1 1 d . . .
H9 H 0.3105 -0.2028 1.1072 0.071 Uiso 1 1 calc R . .
C32 C 0.4911(3) 0.11505(15) 0.8458(2) 0.0457(8) Uani 1 1 d . . .
H32 H 0.5297 0.1452 0.8705 0.055 Uiso 1 1 calc R . .
C49 C 0.0581(4) 0.0627(2) 0.9271(2) 0.0719(14) Uani 1 1 d . . .
H49 H 0.0329 0.0687 0.9762 0.086 Uiso 1 1 calc R . .
C16 C 0.5583(3) -0.1967(2) 0.6109(2) 0.0681(13) Uani 1 1 d . . .
H16A H 0.6132 -0.2175 0.5888 0.102 Uiso 1 1 calc R . .
H16B H 0.5638 -0.1555 0.5996 0.102 Uiso 1 1 calc R . .
H16C H 0.4933 -0.2112 0.5881 0.102 Uiso 1 1 calc R . .
C5 C 0.0601(3) -0.24370(18) 0.8974(2) 0.0560(10) Uani 1 1 d . . .
H5A H 0.1048 -0.2737 0.8800 0.084 Uiso 1 1 calc R . .
H5B H -0.0064 -0.2602 0.9038 0.084 Uiso 1 1 calc R . .
H5C H 0.0887 -0.2281 0.9471 0.084 Uiso 1 1 calc R . .
C50 C 0.0289(3) 0.01356(19) 0.8837(2) 0.0623(12) Uani 1 1 d . . .
H50 H -0.0162 -0.0134 0.9031 0.075 Uiso 1 1 calc R . .
C22 C 0.7219(2) -0.03752(16) 0.89919(18) 0.0436(8) Uani 1 1 d . . .
H22 H 0.7760 -0.0179 0.9271 0.052 Uiso 1 1 calc R . .
C13 C 0.2262(3) -0.12535(17) 1.00799(19) 0.0574(11) Uani 1 1 d . . .
H13A H 0.2023 -0.1074 0.9586 0.086 Uiso 1 1 calc R . .
H13B H 0.2769 -0.1006 1.0356 0.086 Uiso 1 1 calc R . .
H13C H 0.1693 -0.1306 1.0397 0.086 Uiso 1 1 calc R . .
C48 C 0.1232(4) 0.10233(18) 0.89891(19) 0.0603(12) Uani 1 1 d . . .
H48 H 0.1419 0.1357 0.9283 0.072 Uiso 1 1 calc R . .
C4 C -0.0205(3) -0.14721(18) 0.8628(2) 0.0605(11) Uani 1 1 d . . .
H4A H 0.0088 -0.1306 0.9117 0.091 Uiso 1 1 calc R . .
H4B H -0.0866 -0.1637 0.8705 0.091 Uiso 1 1 calc R . .
H4C H -0.0282 -0.1171 0.8232 0.091 Uiso 1 1 calc R . .
C17 C 0.5492(3) -0.27091(17) 0.7205(3) 0.0682(12) Uani 1 1 d . . .
H17A H 0.6045 -0.2938 0.7026 0.102 Uiso 1 1 calc R . .
H17B H 0.4851 -0.2839 0.6943 0.102 Uiso 1 1 calc R . .
H17C H 0.5475 -0.2756 0.7766 0.102 Uiso 1 1 calc R . .
C11 C 0.3586(3) -0.29372(18) 0.9706(2) 0.0606(11) Uani 1 1 d . . .
H11 H 0.3871 -0.3306 0.9638 0.073 Uiso 1 1 calc R . .
 
loop_
 _atom_site_aniso_label
 _atom_site_aniso_U_11
 _atom_site_aniso_U_22
 _atom_site_aniso_U_33
 _atom_site_aniso_U_23
 _atom_site_aniso_U_13
 _atom_site_aniso_U_12
Zr1 0.01846(12) 0.01999(12) 0.01668(10) -0.00016(8) -0.00042(7) -0.00014(10)
N2 0.0241(10) 0.0257(12) 0.0196(9) -0.0020(8) 0.0000(8) 0.0030(9)
O1 0.0234(9) 0.0292(10) 0.0293(9) 0.0073(7) 0.0041(7) -0.0019(8)
O2 0.0265(9) 0.0250(10) 0.0296(9) -0.0054(7) -0.0048(7) 0.0042(8)
N1 0.0308(12) 0.0242(12) 0.0241(10) 0.0020(8) 0.0017(8) -0.0057(10)
N4 0.0195(10) 0.0205(10) 0.0183(8) -0.0012(7) -0.0014(7) 0.0008(8)
C28 0.0168(11) 0.0242(12) 0.0171(10) 0.0006(8) 0.0024(8) 0.0006(10)
C27 0.0194(11) 0.0234(13) 0.0165(9) 0.0012(8) 0.0016(8) 0.0016(10)
N3 0.0178(9) 0.0248(11) 0.0161(8) -0.0020(7) -0.0008(7) 0.0016(8)
C29 0.0169(11) 0.0236(13) 0.0247(11) -0.0049(9) 0.0025(9) 0.0008(10)
C1 0.0298(13) 0.0250(13) 0.0239(11) -0.0020(9) 0.0057(9) -0.0071(11)
C19 0.0188(12) 0.0296(14) 0.0254(11) -0.0046(10) 0.0010(9) 0.0046(10)
C30 0.0253(13) 0.0230(13) 0.0314(12) -0.0032(10) 0.0079(10) -0.0016(11)
C53 0.0155(11) 0.0456(17) 0.0202(11) 0.0001(10) -0.0015(8) 0.0089(11)
C46 0.0259(13) 0.0326(15) 0.0196(11) 0.0005(9) 0.0023(9) 0.0116(11)
C37 0.0177(11) 0.0306(14) 0.0202(10) -0.0041(9) -0.0014(8) 0.0016(10)
C38 0.0174(11) 0.0345(15) 0.0224(11) -0.0028(10) 0.0008(8) 0.0030(11)
C7 0.0355(15) 0.0349(16) 0.0288(13) 0.0095(11) -0.0046(11) -0.0157(13)
C3 0.0298(14) 0.0354(16) 0.0328(13) 0.0045(11) 0.0049(11) -0.0112(13)
C34 0.0213(12) 0.0290(14) 0.0253(11) -0.0067(10) -0.0024(9) 0.0026(11)
C20 0.0216(12) 0.0379(16) 0.0248(11) -0.0038(11) 0.0007(9) 0.0055(12)
C2 0.0271(13) 0.0290(14) 0.0220(11) -0.0003(9) -0.0021(9) 0.0078(11)
C52 0.0179(11) 0.0340(15) 0.0204(10) -0.0011(9) -0.0014(8) 0.0012(10)
C43 0.0281(14) 0.0373(16) 0.0258(12) -0.0010(11) 0.0073(10) -0.0027(12)
C45 0.0224(12) 0.0282(14) 0.0208(10) 0.0009(9) 0.0027(9) 0.0058(11)
C15 0.0330(15) 0.0429(18) 0.0377(15) -0.0139(13) -0.0026(12) 0.0136(14)
C58 0.0263(14) 0.0470(18) 0.0244(12) 0.0051(11) 0.0012(10) 0.0071(13)
C42 0.0265(13) 0.0341(16) 0.0296(12) -0.0086(11) 0.0007(10) -0.0038(12)
C55 0.0344(16) 0.082(3) 0.0208(12) -0.0070(14) -0.0012(11) 0.0219(18)
C10 0.065(3) 0.092(3) 0.056(2) 0.046(2) -0.0297(19) -0.034(3)
C39 0.0233(13) 0.0509(19) 0.0246(12) -0.0079(12) 0.0057(10) 0.0010(13)
C12 0.0435(18) 0.0371(18) 0.0500(18) 0.0176(14) -0.0054(14) -0.0095(15)
C36 0.0337(14) 0.0355(15) 0.0181(11) -0.0023(10) -0.0014(9) 0.0015(12)
C8 0.0464(18) 0.056(2) 0.0297(14) 0.0091(13) -0.0031(12) -0.0279(17)
C25 0.0325(15) 0.0401(17) 0.0300(13) 0.0072(11) -0.0041(11) 0.0074(13)
C51 0.0426(17) 0.0435(18) 0.0330(14) 0.0080(13) 0.0154(12) 0.0087(15)
C24 0.0225(12) 0.0347(15) 0.0289(12) -0.0042(11) 0.0061(10) 0.0033(11)
C6 0.0384(17) 0.051(2) 0.0400(16) 0.0048(14) -0.0026(13) -0.0195(16)
C18 0.0282(15) 0.055(2) 0.0451(16) -0.0116(15) 0.0003(12) 0.0187(15)
C54 0.0307(15) 0.054(2) 0.0234(12) -0.0057(12) -0.0036(10) 0.0093(14)
C26 0.0288(14) 0.0459(19) 0.0334(14) 0.0055(12) 0.0084(11) 0.0041(13)
C44 0.0426(17) 0.0370(18) 0.0400(15) -0.0067(13) 0.0034(13) -0.0170(15)
C21 0.0264(14) 0.060(2) 0.0275(13) -0.0090(13) -0.0043(11) 0.0028(14)
C57 0.0326(16) 0.060(2) 0.0346(15) 0.0139(14) 0.0052(12) 0.0059(15)
C31 0.0422(17) 0.0290(16) 0.0498(17) -0.0084(13) 0.0126(14) -0.0129(14)
C47 0.0425(17) 0.0400(17) 0.0324(14) -0.0096(12) -0.0040(12) 0.0127(15)
C33 0.0337(15) 0.0443(19) 0.0327(14) -0.0159(12) -0.0019(11) -0.0061(14)
C41 0.0375(16) 0.0456(19) 0.0405(15) -0.0218(14) 0.0039(12) -0.0114(15)
C40 0.0345(16) 0.059(2) 0.0327(14) -0.0259(14) 0.0051(12) -0.0043(15)
C35 0.0343(15) 0.0292(15) 0.0329(13) 0.0027(11) 0.0110(11) -0.0041(12)
C56 0.0373(17) 0.084(3) 0.0253(13) 0.0160(15) 0.0097(12) 0.0165(18)
C23 0.0269(14) 0.0444(19) 0.0413(15) -0.0081(13) 0.0096(12) -0.0060(13)
C14 0.074(3) 0.0282(18) 0.065(2) 0.0093(16) 0.0102(19) 0.0007(18)
C9 0.061(2) 0.080(3) 0.0324(16) 0.0210(17) -0.0154(15) -0.043(2)
C32 0.0403(18) 0.0424(19) 0.0543(19) -0.0197(15) 0.0034(14) -0.0174(16)
C49 0.108(4) 0.083(3) 0.0281(16) 0.0062(18) 0.027(2) 0.049(3)
C16 0.051(2) 0.114(4) 0.0388(18) -0.029(2) 0.0000(15) 0.032(2)
C5 0.048(2) 0.071(3) 0.0472(18) 0.0246(18) -0.0055(15) -0.0313(19)
C50 0.078(3) 0.069(3) 0.0454(19) 0.0191(18) 0.0372(19) 0.027(2)
C22 0.0258(14) 0.067(2) 0.0375(15) -0.0188(15) 0.0022(12) -0.0126(15)
C13 0.081(3) 0.063(3) 0.0305(15) -0.0090(15) 0.0140(16) -0.024(2)
C48 0.090(3) 0.061(3) 0.0276(15) -0.0138(15) -0.0062(17) 0.036(2)
C4 0.042(2) 0.063(3) 0.081(3) -0.011(2) 0.0314(19) -0.0107(19)
C17 0.049(2) 0.043(2) 0.111(3) -0.025(2) 0.001(2) 0.0199(19)
C11 0.052(2) 0.049(2) 0.078(3) 0.030(2) -0.0109(19) -0.0063(19)
 
_geom_special_details
;
 All esds (except the esd in the dihedral angle between two l.s. planes)
 are estimated using the full covariance matrix.  The cell esds are taken
 into account individually in the estimation of esds in distances, angles
 and torsion angles; correlations between esds in cell parameters are only
 used when they are defined by crystal symmetry.  An approximate (isotropic)
 treatment of cell esds is used for estimating esds involving l.s. planes.
;
 
loop_
 _geom_bond_atom_site_label_1
 _geom_bond_atom_site_label_2
 _geom_bond_distance
 _geom_bond_site_symmetry_2
 _geom_bond_publ_flag
Zr1 N3 2.0328(19) . ?
Zr1 N4 2.069(2) . ?
Zr1 O1 2.1344(19) . ?
Zr1 O2 2.1645(19) . ?
Zr1 N2 2.346(2) . ?
Zr1 N1 2.470(2) . ?
Zr1 C28 2.548(2) . ?
Zr1 C27 2.560(2) . ?
Zr1 C2 2.672(3) . ?
Zr1 C1 2.727(3) . ?
N2 C2 1.310(3) . ?
N2 C19 1.421(3) . ?
O1 C1 1.308(3) . ?
O2 C2 1.296(3) . ?
N1 C1 1.296(3) . ?
N1 C7 1.428(3) . ?
N4 C27 1.410(3) . ?
N4 C29 1.415(3) . ?
C28 C27 1.381(3) . ?
C28 N3 1.406(3) . ?
C28 C52 1.520(3) . ?
C27 C45 1.514(3) . ?
N3 C37 1.424(3) . ?
C29 C34 1.403(3) . ?
C29 C30 1.407(4) . ?
C1 C3 1.533(4) . ?
C19 C24 1.386(4) . ?
C19 C20 1.401(3) . ?
C30 C31 1.386(4) . ?
C30 C35 1.501(4) . ?
C53 C58 1.384(4) . ?
C53 C54 1.386(4) . ?
C53 C52 1.515(3) . ?
C46 C51 1.370(4) . ?
C46 C47 1.387(4) . ?
C46 C45 1.510(3) . ?
C37 C42 1.392(4) . ?
C37 C38 1.405(3) . ?
C38 C39 1.387(3) . ?
C38 C43 1.502(4) . ?
C7 C12 1.384(5) . ?
C7 C8 1.408(4) . ?
C3 C4 1.509(5) . ?
C3 C5 1.523(4) . ?
C3 C6 1.531(4) . ?
C34 C33 1.385(4) . ?
C34 C36 1.503(4) . ?
C20 C21 1.389(4) . ?
C20 C25 1.502(4) . ?
C2 C15 1.525(4) . ?
C15 C18 1.519(4) . ?
C15 C17 1.535(5) . ?
C15 C16 1.540(4) . ?
C58 C57 1.385(4) . ?
C42 C41 1.395(4) . ?
C42 C44 1.502(4) . ?
C55 C56 1.364(5) . ?
C55 C54 1.400(4) . ?
C10 C9 1.371(6) . ?
C10 C11 1.375(6) . ?
C39 C40 1.371(4) . ?
C12 C11 1.399(4) . ?
C12 C14 1.491(5) . ?
C8 C9 1.387(5) . ?
C8 C13 1.499(5) . ?
C51 C50 1.380(4) . ?
C24 C23 1.397(4) . ?
C24 C26 1.498(4) . ?
C21 C22 1.379(5) . ?
C57 C56 1.379(5) . ?
C31 C32 1.378(5) . ?
C47 C48 1.390(4) . ?
C33 C32 1.380(5) . ?
C41 C40 1.377(4) . ?
C23 C22 1.374(4) . ?
C49 C48 1.354(6) . ?
C49 C50 1.375(6) . ?
 
loop_
 _geom_angle_atom_site_label_1
 _geom_angle_atom_site_label_2
 _geom_angle_atom_site_label_3
 _geom_angle
 _geom_angle_site_symmetry_1
 _geom_angle_site_symmetry_3
 _geom_angle_publ_flag
N3 Zr1 N4 83.68(8) . . ?
N3 Zr1 O1 96.73(8) . . ?
N4 Zr1 O1 107.31(8) . . ?
N3 Zr1 O2 82.60(7) . . ?
N4 Zr1 O2 135.60(8) . . ?
O1 Zr1 O2 116.11(7) . . ?
N3 Zr1 N2 110.66(8) . . ?
N4 Zr1 N2 88.83(8) . . ?
O1 Zr1 N2 149.73(7) . . ?
O2 Zr1 N2 57.69(7) . . ?
N3 Zr1 N1 142.68(8) . . ?
N4 Zr1 N1 126.00(7) . . ?
O1 Zr1 N1 56.04(7) . . ?
O2 Zr1 N1 87.65(8) . . ?
N2 Zr1 N1 93.72(7) . . ?
N3 Zr1 C28 33.40(8) . . ?
N4 Zr1 C28 61.62(7) . . ?
O1 Zr1 C28 80.49(7) . . ?
O2 Zr1 C28 115.95(7) . . ?
N2 Zr1 C28 129.67(7) . . ?
N1 Zr1 C28 136.50(8) . . ?
N3 Zr1 C27 61.76(8) . . ?
N4 Zr1 C27 33.38(7) . . ?
O1 Zr1 C27 84.60(7) . . ?
O2 Zr1 C27 141.26(7) . . ?
N2 Zr1 C27 119.24(8) . . ?
N1 Zr1 C27 129.76(7) . . ?
C28 Zr1 C27 31.37(7) . . ?
N3 Zr1 C2 94.16(8) . . ?
N4 Zr1 C2 111.63(8) . . ?
O1 Zr1 C2 140.45(8) . . ?
O2 Zr1 C2 28.71(7) . . ?
N2 Zr1 C2 29.36(7) . . ?
N1 Zr1 C2 94.22(8) . . ?
C28 Zr1 C2 124.43(7) . . ?
C27 Zr1 C2 133.36(8) . . ?
N3 Zr1 C1 119.42(8) . . ?
N4 Zr1 C1 122.67(8) . . ?
O1 Zr1 C1 27.98(7) . . ?
O2 Zr1 C1 100.74(8) . . ?
N2 Zr1 C1 121.94(8) . . ?
N1 Zr1 C1 28.32(7) . . ?
C28 Zr1 C1 108.39(8) . . ?
C27 Zr1 C1 109.45(8) . . ?
C2 Zr1 C1 117.18(8) . . ?
C2 N2 C19 127.0(2) . . ?
C2 N2 Zr1 89.22(15) . . ?
C19 N2 Zr1 142.82(16) . . ?
C1 O1 Zr1 102.09(16) . . ?
C2 O2 Zr1 97.92(15) . . ?
C1 N1 C7 126.6(2) . . ?
C1 N1 Zr1 86.92(15) . . ?
C7 N1 Zr1 146.00(18) . . ?
C27 N4 C29 120.7(2) . . ?
C27 N4 Zr1 92.79(14) . . ?
C29 N4 Zr1 145.99(16) . . ?
C27 C28 N3 118.9(2) . . ?
C27 C28 C52 123.4(2) . . ?
N3 C28 C52 117.1(2) . . ?
C27 C28 Zr1 74.80(14) . . ?
N3 C28 Zr1 52.75(10) . . ?
C52 C28 Zr1 140.46(17) . . ?
C28 C27 N4 118.6(2) . . ?
C28 C27 C45 123.8(2) . . ?
N4 C27 C45 117.5(2) . . ?
C28 C27 Zr1 73.83(14) . . ?
N4 C27 Zr1 53.83(12) . . ?
C45 C27 Zr1 144.45(15) . . ?
C28 N3 C37 121.04(19) . . ?
C28 N3 Zr1 93.85(13) . . ?
C37 N3 Zr1 142.25(17) . . ?
C34 C29 C30 119.6(2) . . ?
C34 C29 N4 117.9(2) . . ?
C30 C29 N4 122.4(2) . . ?
N1 C1 O1 113.9(2) . . ?
N1 C1 C3 131.6(2) . . ?
O1 C1 C3 114.4(2) . . ?
N1 C1 Zr1 64.76(14) . . ?
O1 C1 Zr1 49.93(12) . . ?
C3 C1 Zr1 161.85(18) . . ?
C24 C19 C20 120.9(2) . . ?
C24 C19 N2 121.1(2) . . ?
C20 C19 N2 118.0(2) . . ?
C31 C30 C29 118.9(3) . . ?
C31 C30 C35 118.1(3) . . ?
C29 C30 C35 123.0(2) . . ?
C58 C53 C54 118.6(3) . . ?
C58 C53 C52 120.7(2) . . ?
C54 C53 C52 120.7(3) . . ?
C51 C46 C47 119.4(3) . . ?
C51 C46 C45 120.7(3) . . ?
C47 C46 C45 119.8(3) . . ?
C42 C37 C38 120.7(2) . . ?
C42 C37 N3 120.9(2) . . ?
C38 C37 N3 118.4(2) . . ?
C39 C38 C37 118.5(3) . . ?
C39 C38 C43 120.7(2) . . ?
C37 C38 C43 120.7(2) . . ?
C12 C7 C8 121.4(3) . . ?
C12 C7 N1 119.2(3) . . ?
C8 C7 N1 119.3(3) . . ?
C4 C3 C5 110.1(3) . . ?
C4 C3 C6 108.1(3) . . ?
C5 C3 C6 108.5(3) . . ?
C4 C3 C1 108.1(2) . . ?
C5 C3 C1 115.2(3) . . ?
C6 C3 C1 106.6(2) . . ?
C33 C34 C29 119.5(3) . . ?
C33 C34 C36 120.0(2) . . ?
C29 C34 C36 120.4(2) . . ?
C21 C20 C19 118.8(3) . . ?
C21 C20 C25 120.8(2) . . ?
C19 C20 C25 120.4(2) . . ?
O2 C2 N2 113.7(2) . . ?
O2 C2 C15 115.0(2) . . ?
N2 C2 C15 131.2(2) . . ?
O2 C2 Zr1 53.37(12) . . ?
N2 C2 Zr1 61.42(14) . . ?
C15 C2 Zr1 163.09(17) . . ?
C53 C52 C28 113.2(2) . . ?
C46 C45 C27 117.1(2) . . ?
C18 C15 C2 116.1(2) . . ?
C18 C15 C17 108.2(3) . . ?
C2 C15 C17 107.7(3) . . ?
C18 C15 C16 109.1(3) . . ?
C2 C15 C16 105.4(2) . . ?
C17 C15 C16 110.2(3) . . ?
C53 C58 C57 121.4(3) . . ?
C37 C42 C41 118.5(3) . . ?
C37 C42 C44 122.2(2) . . ?
C41 C42 C44 119.2(3) . . ?
C56 C55 C54 121.0(3) . . ?
C9 C10 C11 119.5(3) . . ?
C40 C39 C38 121.3(3) . . ?
C7 C12 C11 118.1(3) . . ?
C7 C12 C14 121.8(3) . . ?
C11 C12 C14 120.0(4) . . ?
C9 C8 C7 118.0(4) . . ?
C9 C8 C13 118.9(3) . . ?
C7 C8 C13 123.1(3) . . ?
C46 C51 C50 120.4(3) . . ?
C19 C24 C23 118.6(3) . . ?
C19 C24 C26 121.5(2) . . ?
C23 C24 C26 119.9(3) . . ?
C53 C54 C55 119.6(3) . . ?
C22 C21 C20 120.7(3) . . ?
C56 C57 C58 119.6(3) . . ?
C32 C31 C30 121.6(3) . . ?
C46 C47 C48 119.6(3) . . ?
C32 C33 C34 121.0(3) . . ?
C40 C41 C42 121.1(3) . . ?
C39 C40 C41 119.7(3) . . ?
C55 C56 C57 119.7(3) . . ?
C22 C23 C24 121.1(3) . . ?
C10 C9 C8 121.6(4) . . ?
C31 C32 C33 119.4(3) . . ?
C48 C49 C50 120.4(3) . . ?
C49 C50 C51 119.9(4) . . ?
C23 C22 C21 119.9(3) . . ?
C49 C48 C47 120.2(4) . . ?
C10 C11 C12 121.4(4) . . ?
 
loop_
 _geom_torsion_atom_site_label_1
 _geom_torsion_atom_site_label_2
 _geom_torsion_atom_site_label_3
 _geom_torsion_atom_site_label_4
 _geom_torsion
 _geom_torsion_site_symmetry_1
 _geom_torsion_site_symmetry_2
 _geom_torsion_site_symmetry_3
 _geom_torsion_site_symmetry_4
 _geom_torsion_publ_flag
N3 Zr1 N2 C2 -59.20(17) . . . . ?
N4 Zr1 N2 C2 -142.00(15) . . . . ?
O1 Zr1 N2 C2 94.24(19) . . . . ?
O2 Zr1 N2 C2 7.13(14) . . . . ?
N1 Zr1 N2 C2 91.99(15) . . . . ?
C28 Zr1 N2 C2 -91.39(17) . . . . ?
C27 Zr1 N2 C2 -127.58(15) . . . . ?
C1 Zr1 N2 C2 89.42(16) . . . . ?
N3 Zr1 N2 C19 108.9(3) . . . . ?
N4 Zr1 N2 C19 26.1(3) . . . . ?
O1 Zr1 N2 C19 -97.7(3) . . . . ?
O2 Zr1 N2 C19 175.2(3) . . . . ?
N1 Zr1 N2 C19 -100.0(3) . . . . ?
C28 Zr1 N2 C19 76.7(3) . . . . ?
C27 Zr1 N2 C19 40.5(3) . . . . ?
C2 Zr1 N2 C19 168.1(4) . . . . ?
C1 Zr1 N2 C19 -102.5(3) . . . . ?
N3 Zr1 O1 C1 146.34(16) . . . . ?
N4 Zr1 O1 C1 -128.21(15) . . . . ?
O2 Zr1 O1 C1 61.31(17) . . . . ?
N2 Zr1 O1 C1 -8.8(2) . . . . ?
N1 Zr1 O1 C1 -6.04(15) . . . . ?
C28 Zr1 O1 C1 175.64(17) . . . . ?
C27 Zr1 O1 C1 -152.99(16) . . . . ?
C2 Zr1 O1 C1 41.4(2) . . . . ?
N3 Zr1 O2 C2 112.92(16) . . . . ?
N4 Zr1 O2 C2 39.86(18) . . . . ?
O1 Zr1 O2 C2 -153.19(14) . . . . ?
N2 Zr1 O2 C2 -7.28(14) . . . . ?
N1 Zr1 O2 C2 -103.18(15) . . . . ?
C28 Zr1 O2 C2 114.87(15) . . . . ?
C27 Zr1 O2 C2 90.49(17) . . . . ?
C1 Zr1 O2 C2 -128.42(15) . . . . ?
N3 Zr1 N1 C1 -43.4(2) . . . . ?
N4 Zr1 N1 C1 93.34(17) . . . . ?
O1 Zr1 N1 C1 5.97(15) . . . . ?
O2 Zr1 N1 C1 -117.99(16) . . . . ?
N2 Zr1 N1 C1 -175.40(16) . . . . ?
C28 Zr1 N1 C1 8.4(2) . . . . ?
C27 Zr1 N1 C1 50.91(19) . . . . ?
C2 Zr1 N1 C1 -145.97(16) . . . . ?
N3 Zr1 N1 C7 127.5(3) . . . . ?
N4 Zr1 N1 C7 -95.7(3) . . . . ?
O1 Zr1 N1 C7 177.0(4) . . . . ?
O2 Zr1 N1 C7 53.0(3) . . . . ?
N2 Zr1 N1 C7 -4.4(3) . . . . ?
C28 Zr1 N1 C7 179.4(3) . . . . ?
C27 Zr1 N1 C7 -138.1(3) . . . . ?
C2 Zr1 N1 C7 25.0(3) . . . . ?
C1 Zr1 N1 C7 171.0(4) . . . . ?
N3 Zr1 N4 C27 45.80(13) . . . . ?
O1 Zr1 N4 C27 -49.30(14) . . . . ?
O2 Zr1 N4 C27 118.44(14) . . . . ?
N2 Zr1 N4 C27 156.73(13) . . . . ?
N1 Zr1 N4 C27 -109.51(13) . . . . ?
C28 Zr1 N4 C27 19.29(12) . . . . ?
C2 Zr1 N4 C27 137.79(13) . . . . ?
C1 Zr1 N4 C27 -75.27(15) . . . . ?
N3 Zr1 N4 C29 -144.1(3) . . . . ?
O1 Zr1 N4 C29 120.8(3) . . . . ?
O2 Zr1 N4 C29 -71.5(3) . . . . ?
N2 Zr1 N4 C29 -33.2(3) . . . . ?
N1 Zr1 N4 C29 60.6(3) . . . . ?
C28 Zr1 N4 C29 -170.6(3) . . . . ?
C27 Zr1 N4 C29 170.1(4) . . . . ?
C2 Zr1 N4 C29 -52.1(3) . . . . ?
C1 Zr1 N4 C29 94.8(3) . . . . ?
N3 Zr1 C28 C27 -146.7(2) . . . . ?
N4 Zr1 C28 C27 -20.43(13) . . . . ?
O1 Zr1 C28 C27 95.25(14) . . . . ?
O2 Zr1 C28 C27 -150.25(13) . . . . ?
N2 Zr1 C28 C27 -81.88(16) . . . . ?
N1 Zr1 C28 C27 93.23(16) . . . . ?
C2 Zr1 C28 C27 -118.34(14) . . . . ?
C1 Zr1 C28 C27 97.41(14) . . . . ?
N4 Zr1 C28 N3 126.30(16) . . . . ?
O1 Zr1 C28 N3 -118.02(15) . . . . ?
O2 Zr1 C28 N3 -3.51(16) . . . . ?
N2 Zr1 C28 N3 64.85(17) . . . . ?
N1 Zr1 C28 N3 -120.04(15) . . . . ?
C27 Zr1 C28 N3 146.7(2) . . . . ?
C2 Zr1 C28 N3 28.39(17) . . . . ?
C1 Zr1 C28 N3 -115.86(14) . . . . ?
N3 Zr1 C28 C52 88.8(3) . . . . ?
N4 Zr1 C28 C52 -144.9(3) . . . . ?
O1 Zr1 C28 C52 -29.2(2) . . . . ?
O2 Zr1 C28 C52 85.3(3) . . . . ?
N2 Zr1 C28 C52 153.7(2) . . . . ?
N1 Zr1 C28 C52 -31.2(3) . . . . ?
C27 Zr1 C28 C52 -124.5(3) . . . . ?
C2 Zr1 C28 C52 117.2(2) . . . . ?
C1 Zr1 C28 C52 -27.1(3) . . . . ?
N3 C28 C27 N4 1.0(3) . . . . ?
C52 C28 C27 N4 172.0(2) . . . . ?
Zr1 C28 C27 N4 30.89(19) . . . . ?
N3 C28 C27 C45 -175.6(2) . . . . ?
C52 C28 C27 C45 -4.6(4) . . . . ?
Zr1 C28 C27 C45 -145.6(2) . . . . ?
N3 C28 C27 Zr1 -29.92(18) . . . . ?
C52 C28 C27 Zr1 141.1(2) . . . . ?
C29 N4 C27 C28 148.8(2) . . . . ?
Zr1 N4 C27 C28 -37.6(2) . . . . ?
C29 N4 C27 C45 -34.5(3) . . . . ?
Zr1 N4 C27 C45 139.10(19) . . . . ?
C29 N4 C27 Zr1 -173.6(2) . . . . ?
N3 Zr1 C27 C28 20.05(13) . . . . ?
N4 Zr1 C27 C28 146.1(2) . . . . ?
O1 Zr1 C27 C28 -80.57(14) . . . . ?
O2 Zr1 C27 C28 45.48(19) . . . . ?
N2 Zr1 C27 C28 119.16(14) . . . . ?
N1 Zr1 C27 C28 -116.62(14) . . . . ?
C2 Zr1 C27 C28 86.85(16) . . . . ?
C1 Zr1 C27 C28 -93.63(14) . . . . ?
N3 Zr1 C27 N4 -126.02(15) . . . . ?
O1 Zr1 C27 N4 133.36(14) . . . . ?
O2 Zr1 C27 N4 -100.58(15) . . . . ?
N2 Zr1 C27 N4 -26.91(15) . . . . ?
N1 Zr1 C27 N4 97.31(15) . . . . ?
C28 Zr1 C27 N4 -146.1(2) . . . . ?
C2 Zr1 C27 N4 -59.22(16) . . . . ?
C1 Zr1 C27 N4 120.30(13) . . . . ?
N3 Zr1 C27 C45 146.3(3) . . . . ?
N4 Zr1 C27 C45 -87.7(3) . . . . ?
O1 Zr1 C27 C45 45.7(3) . . . . ?
O2 Zr1 C27 C45 171.7(2) . . . . ?
N2 Zr1 C27 C45 -114.6(3) . . . . ?
N1 Zr1 C27 C45 9.6(3) . . . . ?
C28 Zr1 C27 C45 126.2(3) . . . . ?
C2 Zr1 C27 C45 -146.9(3) . . . . ?
C1 Zr1 C27 C45 32.6(3) . . . . ?
C27 C28 N3 C37 -157.9(2) . . . . ?
C52 C28 N3 C37 30.5(3) . . . . ?
Zr1 C28 N3 C37 164.9(3) . . . . ?
C27 C28 N3 Zr1 37.2(2) . . . . ?
C52 C28 N3 Zr1 -134.34(18) . . . . ?
N4 Zr1 N3 C28 -45.51(14) . . . . ?
O1 Zr1 N3 C28 61.25(14) . . . . ?
O2 Zr1 N3 C28 176.81(14) . . . . ?
N2 Zr1 N3 C28 -131.87(13) . . . . ?
N1 Zr1 N3 C28 100.62(17) . . . . ?
C27 Zr1 N3 C28 -18.91(13) . . . . ?
C2 Zr1 N3 C28 -156.85(14) . . . . ?
C1 Zr1 N3 C28 78.62(16) . . . . ?
N4 Zr1 N3 C37 155.9(3) . . . . ?
O1 Zr1 N3 C37 -97.3(3) . . . . ?
O2 Zr1 N3 C37 18.2(3) . . . . ?
N2 Zr1 N3 C37 69.6(3) . . . . ?
N1 Zr1 N3 C37 -58.0(3) . . . . ?
C28 Zr1 N3 C37 -158.6(3) . . . . ?
C27 Zr1 N3 C37 -177.5(3) . . . . ?
C2 Zr1 N3 C37 44.6(3) . . . . ?
C1 Zr1 N3 C37 -80.0(3) . . . . ?
C27 N4 C29 C34 131.2(2) . . . . ?
Zr1 N4 C29 C34 -37.3(4) . . . . ?
C27 N4 C29 C30 -51.0(3) . . . . ?
Zr1 N4 C29 C30 140.5(2) . . . . ?
C7 N1 C1 O1 177.4(2) . . . . ?
Zr1 N1 C1 O1 -8.9(2) . . . . ?
C7 N1 C1 C3 -3.2(5) . . . . ?
Zr1 N1 C1 C3 170.5(3) . . . . ?
C7 N1 C1 Zr1 -173.7(3) . . . . ?
Zr1 O1 C1 N1 10.5(3) . . . . ?
Zr1 O1 C1 C3 -169.01(18) . . . . ?
N3 Zr1 C1 N1 151.40(15) . . . . ?
N4 Zr1 C1 N1 -106.38(16) . . . . ?
O1 Zr1 C1 N1 -169.4(3) . . . . ?
O2 Zr1 C1 N1 63.90(16) . . . . ?
N2 Zr1 C1 N1 5.41(18) . . . . ?
C28 Zr1 C1 N1 -173.93(15) . . . . ?
C27 Zr1 C1 N1 -140.74(15) . . . . ?
C2 Zr1 C1 N1 38.86(18) . . . . ?
N3 Zr1 C1 O1 -39.20(18) . . . . ?
N4 Zr1 C1 O1 63.02(17) . . . . ?
O2 Zr1 C1 O1 -126.70(15) . . . . ?
N2 Zr1 C1 O1 174.81(14) . . . . ?
N1 Zr1 C1 O1 169.4(3) . . . . ?
C28 Zr1 C1 O1 -4.53(17) . . . . ?
C27 Zr1 C1 O1 28.66(17) . . . . ?
C2 Zr1 C1 O1 -151.74(15) . . . . ?
N3 Zr1 C1 C3 -5.3(7) . . . . ?
N4 Zr1 C1 C3 96.9(6) . . . . ?
O1 Zr1 C1 C3 33.9(6) . . . . ?
O2 Zr1 C1 C3 -92.8(6) . . . . ?
N2 Zr1 C1 C3 -151.3(6) . . . . ?
N1 Zr1 C1 C3 -156.7(7) . . . . ?
C28 Zr1 C1 C3 29.3(6) . . . . ?
C27 Zr1 C1 C3 62.5(6) . . . . ?
C2 Zr1 C1 C3 -117.9(6) . . . . ?
C2 N2 C19 C24 90.9(3) . . . . ?
Zr1 N2 C19 C24 -74.1(3) . . . . ?
C2 N2 C19 C20 -92.6(3) . . . . ?
Zr1 N2 C19 C20 102.4(3) . . . . ?
C34 C29 C30 C31 0.0(4) . . . . ?
N4 C29 C30 C31 -177.8(2) . . . . ?
C34 C29 C30 C35 177.5(2) . . . . ?
N4 C29 C30 C35 -0.3(4) . . . . ?
C28 N3 C37 C42 -105.2(3) . . . . ?
Zr1 N3 C37 C42 49.6(4) . . . . ?
C28 N3 C37 C38 76.1(3) . . . . ?
Zr1 N3 C37 C38 -129.1(3) . . . . ?
C42 C37 C38 C39 2.9(4) . . . . ?
N3 C37 C38 C39 -178.5(2) . . . . ?
C42 C37 C38 C43 -177.0(2) . . . . ?
N3 C37 C38 C43 1.7(4) . . . . ?
C1 N1 C7 C12 98.8(4) . . . . ?
Zr1 N1 C7 C12 -70.0(4) . . . . ?
C1 N1 C7 C8 -85.6(4) . . . . ?
Zr1 N1 C7 C8 105.6(4) . . . . ?
N1 C1 C3 C4 116.4(4) . . . . ?
O1 C1 C3 C4 -64.2(3) . . . . ?
Zr1 C1 C3 C4 -92.1(6) . . . . ?
N1 C1 C3 C5 -7.2(5) . . . . ?
O1 C1 C3 C5 172.2(3) . . . . ?
Zr1 C1 C3 C5 144.3(5) . . . . ?
N1 C1 C3 C6 -127.5(3) . . . . ?
O1 C1 C3 C6 51.8(3) . . . . ?
Zr1 C1 C3 C6 23.9(7) . . . . ?
C30 C29 C34 C33 -0.3(4) . . . . ?
N4 C29 C34 C33 177.6(2) . . . . ?
C30 C29 C34 C36 176.0(2) . . . . ?
N4 C29 C34 C36 -6.1(4) . . . . ?
C24 C19 C20 C21 -1.0(4) . . . . ?
N2 C19 C20 C21 -177.5(2) . . . . ?
C24 C19 C20 C25 179.1(2) . . . . ?
N2 C19 C20 C25 2.5(4) . . . . ?
Zr1 O2 C2 N2 12.1(2) . . . . ?
Zr1 O2 C2 C15 -165.6(2) . . . . ?
C19 N2 C2 O2 178.0(2) . . . . ?
Zr1 N2 C2 O2 -11.0(2) . . . . ?
C19 N2 C2 C15 -4.7(5) . . . . ?
Zr1 N2 C2 C15 166.2(3) . . . . ?
C19 N2 C2 Zr1 -171.0(3) . . . . ?
N3 Zr1 C2 O2 -66.32(15) . . . . ?
N4 Zr1 C2 O2 -151.16(14) . . . . ?
O1 Zr1 C2 O2 39.5(2) . . . . ?
N2 Zr1 C2 O2 167.4(2) . . . . ?
N1 Zr1 C2 O2 77.28(15) . . . . ?
C28 Zr1 C2 O2 -81.53(17) . . . . ?
C27 Zr1 C2 O2 -120.60(15) . . . . ?
C1 Zr1 C2 O2 59.92(16) . . . . ?
N3 Zr1 C2 N2 126.30(15) . . . . ?
N4 Zr1 C2 N2 41.46(16) . . . . ?
O1 Zr1 C2 N2 -127.88(16) . . . . ?
O2 Zr1 C2 N2 -167.4(2) . . . . ?
N1 Zr1 C2 N2 -90.10(15) . . . . ?
C28 Zr1 C2 N2 111.09(15) . . . . ?
C27 Zr1 C2 N2 72.03(17) . . . . ?
C1 Zr1 C2 N2 -107.46(16) . . . . ?
N3 Zr1 C2 C15 -15.8(7) . . . . ?
N4 Zr1 C2 C15 -100.6(7) . . . . ?
O1 Zr1 C2 C15 90.1(7) . . . . ?
O2 Zr1 C2 C15 50.6(7) . . . . ?
N2 Zr1 C2 C15 -142.1(8) . . . . ?
N1 Zr1 C2 C15 127.8(7) . . . . ?
C28 Zr1 C2 C15 -31.0(8) . . . . ?
C27 Zr1 C2 C15 -70.0(7) . . . . ?
C1 Zr1 C2 C15 110.5(7) . . . . ?
C58 C53 C52 C28 -61.6(3) . . . . ?
C54 C53 C52 C28 117.4(3) . . . . ?
C27 C28 C52 C53 99.5(3) . . . . ?
N3 C28 C52 C53 -89.4(3) . . . . ?
Zr1 C28 C52 C53 -152.8(2) . . . . ?
C51 C46 C45 C27 -66.8(3) . . . . ?
C47 C46 C45 C27 117.1(3) . . . . ?
C28 C27 C45 C46 126.5(3) . . . . ?
N4 C27 C45 C46 -50.1(3) . . . . ?
Zr1 C27 C45 C46 15.3(4) . . . . ?
O2 C2 C15 C18 -175.8(3) . . . . ?
N2 C2 C15 C18 6.9(5) . . . . ?
Zr1 C2 C15 C18 141.0(6) . . . . ?
O2 C2 C15 C17 -54.3(3) . . . . ?
N2 C2 C15 C17 128.4(3) . . . . ?
Zr1 C2 C15 C17 -97.5(7) . . . . ?
O2 C2 C15 C16 63.3(3) . . . . ?
N2 C2 C15 C16 -114.0(3) . . . . ?
Zr1 C2 C15 C16 20.2(9) . . . . ?
C54 C53 C58 C57 0.6(4) . . . . ?
C52 C53 C58 C57 179.6(2) . . . . ?
C38 C37 C42 C41 -2.2(4) . . . . ?
N3 C37 C42 C41 179.1(3) . . . . ?
C38 C37 C42 C44 179.1(3) . . . . ?
N3 C37 C42 C44 0.4(4) . . . . ?
C37 C38 C39 C40 -1.2(4) . . . . ?
C43 C38 C39 C40 178.6(3) . . . . ?
C8 C7 C12 C11 -1.7(5) . . . . ?
N1 C7 C12 C11 173.8(3) . . . . ?
C8 C7 C12 C14 174.7(3) . . . . ?
N1 C7 C12 C14 -9.8(5) . . . . ?
C12 C7 C8 C9 0.9(5) . . . . ?
N1 C7 C8 C9 -174.6(3) . . . . ?
C12 C7 C8 C13 -177.9(3) . . . . ?
N1 C7 C8 C13 6.6(5) . . . . ?
C47 C46 C51 C50 2.3(4) . . . . ?
C45 C46 C51 C50 -173.8(3) . . . . ?
C20 C19 C24 C23 -0.3(4) . . . . ?
N2 C19 C24 C23 176.1(2) . . . . ?
C20 C19 C24 C26 177.3(3) . . . . ?
N2 C19 C24 C26 -6.2(4) . . . . ?
C58 C53 C54 C55 -0.7(4) . . . . ?
C52 C53 C54 C55 -179.7(2) . . . . ?
C56 C55 C54 C53 0.6(4) . . . . ?
C19 C20 C21 C22 1.5(4) . . . . ?
C25 C20 C21 C22 -178.6(3) . . . . ?
C53 C58 C57 C56 -0.5(4) . . . . ?
C29 C30 C31 C32 0.4(5) . . . . ?
C35 C30 C31 C32 -177.2(3) . . . . ?
C51 C46 C47 C48 -2.7(4) . . . . ?
C45 C46 C47 C48 173.5(3) . . . . ?
C29 C34 C33 C32 0.3(4) . . . . ?
C36 C34 C33 C32 -176.0(3) . . . . ?
C37 C42 C41 C40 0.0(5) . . . . ?
C44 C42 C41 C40 178.8(3) . . . . ?
C38 C39 C40 C41 -0.9(5) . . . . ?
C42 C41 C40 C39 1.6(5) . . . . ?
C54 C55 C56 C57 -0.4(5) . . . . ?
C58 C57 C56 C55 0.4(5) . . . . ?
C19 C24 C23 C22 1.2(4) . . . . ?
C26 C24 C23 C22 -176.5(3) . . . . ?
C11 C10 C9 C8 -2.4(6) . . . . ?
C7 C8 C9 C10 1.2(5) . . . . ?
C13 C8 C9 C10 -179.9(3) . . . . ?
C30 C31 C32 C33 -0.4(5) . . . . ?
C34 C33 C32 C31 0.0(5) . . . . ?
C48 C49 C50 C51 0.5(6) . . . . ?
C46 C51 C50 C49 -1.2(5) . . . . ?
C24 C23 C22 C21 -0.7(5) . . . . ?
C20 C21 C22 C23 -0.6(5) . . . . ?
C50 C49 C48 C47 -0.9(6) . . . . ?
C46 C47 C48 C49 2.0(5) . . . . ?
C9 C10 C11 C12 1.5(6) . . . . ?
C7 C12 C11 C10 0.5(5) . . . . ?
C14 C12 C11 C10 -176.0(4) . . . . ?
 
_diffrn_measured_fraction_theta_max    0.984
_diffrn_reflns_theta_full              30.27
_diffrn_measured_fraction_theta_full   0.984
_refine_diff_density_max    0.647
_refine_diff_density_min   -0.901
_refine_diff_density_rms    0.106
